# Supplementary material for: Geography and ethnicity related variation in the Chinese human milk serum proteome
Source: Royal Society of Chemistry journal article supplement (doi:10.1039/c9fo01591d), 2019-01-01
Supplement: c9fo01591d4.xlsx [file c9fo01591d4.xlsx]

## Sheet: Sheet1
Ethinity	Sex（1-Boy,2-Girl）	Delivery mode (1-Natural, 2-Assisted delivery, 3 C-section）	Parity	Term 1, Preterm 2	Age	Lactation days
Bai-Yunnan	1	2	1	1	23.2799	42
Bai-Yunnan	1	2	1	1	21.8617	56
Bai-Yunnan	2	2	1	1	21.9767	57
Bai-Yunnan	2	3	2	1	28.0657	79
Bai-Yunnan	1	3	1	1	22.2943	80
Bai-Yunnan	2	3	1	1	31.551	91
Bai-Yunnan	1	3	1	1	27.6003	91
Bai-Yunnan	1	3	1	1	26.1191	93
Bai-Yunnan	1	2	2	1	28.2574	127
Bai-Yunnan	2	2	1	1	21.1198	128
Bai-Yunnan	1	3	2	1	26.3025	128
Bai-Yunnan	2	3	1	1	22.7652	129
Bai-Yunnan	2	2	2	1	29.1581	130
Bai-Yunnan	1	3	1	1	21.0951	152
Bai-Yunnan	1	3	1	1	22.6612	223
Bai-Yunnan	1	3	2	1	34.7379	228
Bai-Yunnan	2	3	2	1	28.4134	258
Bai-Yunnan	1	1	2	1	36.7474	286
Bai-Yunnan	1	1	1	1	24.7639	294
Bai-Yunnan	1	2	1	1	23.833	327
Bai-Yunnan	2	1	1	1	25.0376	328
Bai-Yunnan	1	2	1	1	20.9747	333
Han-Gansu	2	1	1	1	22.0041	53
Han-Gansu	2	1	2	1	24.1506	86
Han-Gansu	1	1	1	1	27.3785	89
Han-Gansu	1	1	2	1	24.1369	91
Han-Gansu	1	1	1	1	21.2841	97
Han-Gansu	1	1	2	1	28.3997	110
Han-Gansu	2	1	2	1	24.011	112
Han-Gansu	1	1	1	1	20.8843	123
Han-Gansu	1	1	2	1	26.2149	134
Han-Gansu	1	1	2	1	27.2471	143
Han-Gansu	2	1	1	1	20.0767	145
Han-Gansu	1	1	1	1	30.2396	156
Han-Gansu	2	1	2	1	26.653	175
Han-Gansu	1	1	1	1	22.078	193
Han-Gansu	1	1	3	1	31.3758	197
Han-Gansu	1	1	2	1	25.9904	214
Han-Gansu	2	1	1	1	21.7714	223
Han-Gansu	1	1	1	1	22.8665	234
Han-Gansu	1	1	2	1	25.1581	267
Han-Gansu	2	1	1	1	25.4538	270
Han-Gansu	1	1	2	1	27.0746	293
Han-Gansu	2	1	1	1	22.8775	294
Han-Yunnan	2	2	1	1	24.2327	55
Han-Yunnan	1	1	2	1	32.6982	63
Han-Yunnan	1	1	2	1	29.0979	63
Han-Yunnan	1	2	1	1	21.2567	66
Han-Yunnan	1	3	1	1	23.4552	89
Han-Yunnan	1	3	2	1	33.1554	89
Han-Yunnan	2	3	2	1	29.807	124
Han-Yunnan	2	3	1	1	21.4346	131
Han-Yunnan	1	2	2	1	25.0869	136
Han-Yunnan	1	2	2	1	25.4319	137
Han-Yunnan	2	2	1	1	23.321	153
Han-Yunnan	1	1	2	1	32.2765	185
Han-Yunnan	1	3	2	1	25.9329	186
Han-Yunnan	1	3	1	1	23.885	205
Han-Yunnan	1	3	1	1	23.885	205
Han-Yunnan	2	3	2	2	34.7926	215
Han-Yunnan	1	3	1	2	22.1218	224
Han-Yunnan	2	1	1	1	28.9665	286
Han-Yunnan	2	3	1	1	22.36	292
Han-Yunnan	1	3	2	1	35.1759	305
Han-Yunnan	1	3	1	1	26.9487	327
Han-Yunnan	1	3	1	1	26.9487	327
Mongolian-Inner Mongolian	2	3	1	1	21.3963	30
Mongolian-Inner Mongolian	1	3	2	1	29.4867	46
Mongolian-Inner Mongolian	2	1	2	1	34.0616	64
Mongolian-Inner Mongolian	1	2	1	1	20.8624	74
Mongolian-Inner Mongolian	1	3	1	1	22.8474	115
Mongolian-Inner Mongolian	1	3	1	1	24.6598	123
Mongolian-Inner Mongolian	1	3	1	1	31.4168	160
Mongolian-Inner Mongolian	2	3	1	1	25.0869	173
Mongolian-Inner Mongolian	1	3	1	1	24.5284	177
Mongolian-Inner Mongolian	2	1	1	1	22.6037	180
Mongolian-Inner Mongolian	2	3	1	1	24.0219	180
Mongolian-Inner Mongolian	1	3	1	1	21.9603	184
Mongolian-Inner Mongolian	1	3	1	1	28.1013	220
Mongolian-Inner Mongolian	2	1	1	2	25.4565	240
Mongolian-Inner Mongolian	1	3	2	1	33.7276	242
Mongolian-Inner Mongolian	1	3	2	1	34.0999	244
Mongolian-Inner Mongolian	2	1	1	1	19.8385	244
Mongolian-Inner Mongolian	2	1	1	1	24.3395	262
Mongolian-Inner Mongolian	1	2	1	1	25.2074	266
Mongolian-Inner Mongolian	1	3	1	1	23.9699	272
Mongolian-Inner Mongolian	2	1	3	1	38.4559	280
Mongolian-Inner Mongolian	1	3	1	1	21.7248	297
Tibetan-Gansu	1	1	2	1	28.2272	30
Tibetan-Gansu	1	1	1	1	21.9192	38
Tibetan-Gansu	1	1	2	1	13.2457	41
Tibetan-Gansu	1	1	1	1	29.6564	47
Tibetan-Gansu	2	1	1	1	21.4702	68
Tibetan-Gansu	1	1	1	1	25.7248	79
Tibetan-Gansu	1	1	2	1	25.2293	79
Tibetan-Gansu	2	1	1	1	22.5654	91
Tibetan-Gansu	1	1	1	1	24.6982	95
Tibetan-Gansu	2	1	1	1	28.6051	97
Tibetan-Gansu	2	1	2	1	27.5729	97
Tibetan-Gansu	2	1	2	1	23.4223	105
Tibetan-Gansu	2	1	2	1	31.8193	108
Tibetan-Gansu	2	3	1	1	25.473	142
Tibetan-Gansu	1	1	2	1	22.3682	148
Tibetan-Gansu	2	3	2	1	34.9268	155
Tibetan-Gansu	1	1	2	1	23.729	161
Tibetan-Gansu	1	1	1	1	21.3717	161
Tibetan-Gansu	2	1	2	1	31.3238	193
Tibetan-Gansu	1	1	2	1	27.0746	248
Tibetan-Gansu	1	1	2	1	21.5277	251
Tibetan-Gansu	2	1	2	1	23.0883	255
Uygur-Xinjiang	1	1		1	20.9747	63
Uygur-Xinjiang	1	1	1	1	25.18	77
Uygur-Xinjiang	2	1		1	27.5209	106
Uygur-Xinjiang	2			1	27.948	106
Uygur-Xinjiang	2	1	2	1	23.9288	119
Uygur-Xinjiang	2	3	2	1	28.5448	123
Uygur-Xinjiang	1	1	2	1	24.0329	128
Uygur-Xinjiang	1	1	3	2	32.8843	136
Uygur-Xinjiang	1	3	1	1	23.436	145
Uygur-Xinjiang	2	2	1	1	23.7016	174
Uygur-Xinjiang	2	2		1	19.9644	181
Uygur-Xinjiang	1	3	2	1	26.8309	192
Uygur-Xinjiang	2	1	2	1	33.7112	231
Uygur-Xinjiang	2	1	2	1	27.1348	246
Uygur-Xinjiang	2	1	2	1	33.1198	252
Uygur-Xinjiang	1	3	2	1	28.3532	254
Uygur-Xinjiang	1	3	2	1	32.5366	256
Uygur-Xinjiang	1	1	1	1	25.5469	265
Uygur-Xinjiang	1	1		1	28.0684	292
Uygur-Xinjiang	1	1	2	1	30.1821	317
Uygur-Xinjiang	2	3	2	1	27.7892	331
Uygur-Xinjiang	1	1	2	1	25.6454	386
