# Supplementary material for: Geography and ethnicity related variation in the Chinese human milk serum proteome
Source: Royal Society of Chemistry journal article supplement (doi:10.1039/c9fo01591d), 2019-01-01
Supplement: c9fo01591d5.xlsx [file c9fo01591d5.xlsx]

## Sheet: Sheet1
HanYN1	HanYN2	HanYN3	HanGS1	HanGS2	HanGS3	BaiYN1	BaiYN2	BaiYN3	MongolianIM1	MongolianIM2	MongolianIM3	TibetanGS1	TibetanGS2	TibetanGS3	UygurXJ1	UygurXJ2	UygurXJ3	Average Intensity	N: Peptides	N: Razor + unique peptides	N: Unique peptides	N: Sequence coverage [%]	N: Mol. weight [kDa]	N: Number of proteins	T: Uniprot ID	T: Protein name	T: Gene name	Biological function	T: Majority protein IDs
1.07002e+06	1.75361e+06	1.85347e+06	872261	1.73055e+06	1.11917e+06	1.25469e+06	1.86094e+06	1.74452e+06	801921	1.15527e+06	1.07626e+06	1.53446e+06	2.22427e+06	1.18693e+06	818260	1.67218e+06	1.02999e+06	1.39346e+06	16	16	16	26.9	71.957	4	P01042	Kininogen-1	KNG1	Blood coagulation	sp|P61604|CH10_HUMAN
1.1268e+06	1.23716e+06	1.21768e+06	954708	1.20233e+06	977610	1.29149e+06	1.33833e+06	1.25573e+06	817750	737202	844536	1.12836e+06	1.27432e+06	790004	772406	1.0803e+06	772138	1.04071e+06	10	10	10	41.7	38.298	2	P02749	Beta-2-glycoprotein 1	APOH	Blood coagulation	sp|P31946|1433B_HUMAN;sp|P61981|1433G_HUMAN;sp|P27348|1433T_HUMAN;sp|P31947|1433S_HUMAN
1.01701e+06	940195	923338	727456	538953	669071	964485	660913	908105	602207	346141	522510	1.58406e+06	951801	850293	779290	709577	680578	785822	15	15	15	20.9	94.972	1	P02671	Fibrinogen alpha chain	FGA	Blood coagulation	sp|P62258|1433E_HUMAN
553107	908105	1.10591e+06	338994	803423	538542	591779	884498	815995	309676	425117	492751	819509	1.1731e+06	706877	355355	725894	479277	674989	14	14	14	19	90.568	3	P00747	Plasminogen	PLG	Blood coagulation	sp|P63104|1433Z_HUMAN
NAN	549706	988170	NAN	336652	501573	NAN	787271	934672	NAN	263986	458258	NAN	409073	317831	NAN	755200	564768	572263	12	12	12	37.8	35.936	1	P08758	Annexin A5	ANXA5	Blood coagulation	sp|O43598|DNPH1_HUMAN
219689	550812	400433	140003	308348	240988	223699	509315	320619	103301	238082	183765	338360	710118	386980	160532	541349	254905	330095	7	7	7	15.5	55.928	2	P02675	Fibrinogen beta chain	FGB	Blood coagulation	sp|Q9BUT1|BDH2_HUMAN
242714	370291	174226	141515	237012	114922	268116	383429	127152	124294	187132	77285	389591	531607	122227	163406	355010	106000	227836	6	6	6	13.5	51.511	1	P02679	Fibrinogen gamma chain	FGG	Blood coagulation	sp|P25398|RS12_HUMAN
65504.2	220405	154334	63251	229526	75333.3	78325.8	235277	132387	58412.9	106789	70973.9	111710	371963	94472.1	55384.7	205745	65790.9	137064	3	3	3	18.8	21.258	1	P60953	Cell division control protein 42 homolog	CDC42	Blood coagulation	sp|P39019|RS19_HUMAN
NAN	NAN	91672.4	NAN	NAN	55665.7	NAN	NAN	59150.4	NAN	NAN	56914.2	NAN	NAN	40636.8	NAN	NAN	51379.3	59236.5	2	2	2	10.5	32.922	1	P52907	F-actin-capping protein subunit alpha-1	CAPZA1	Blood coagulation	sp|P60866|RS20_HUMAN
21761.6	NAN	68082.7	19458.3	NAN	53791.9	17467.7	NAN	52100.2	19976.3	NAN	49017.2	22733	NAN	46427.8	13530.2	NAN	32702.2	35935.2	2	2	2	7.5	36.978	1	Q03405	Urokinase plasminogen activator surface receptor	PLAUR	Blood coagulation	sp|P62857|RS28_HUMAN
NAN	NAN	50165.2	NAN	NAN	19554.3	NAN	NAN	28235.1	NAN	NAN	22022.6	NAN	NAN	21721	NAN	NAN	14969.1	26111.2	1	1	1	0.4	284.52	1	Q15652	Probable JmjC domain-containing histone demethylation protein 2C	JMJD1C	Blood coagulation	sp|Q9BRK5|CAB45_HUMAN
NAN	NAN	66115.5	NAN	NAN	13306.1	NAN	NAN	28520.3	NAN	NAN	17306.2	NAN	NAN	22558.8	NAN	NAN	12047.1	26642.3	3	3	3	16.9	15.388	5	P84243	Histone H3.3	H3F3A	Blood coagulation	sp|P08195|4F2_HUMAN
2.49827e+06	2.84935e+06	4.68917e+06	2.23215e+06	3.29992e+06	1.63425e+06	2.83025e+06	2.97529e+06	2.89052e+06	2.19137e+06	1.21271e+06	1.2443e+06	3.1517e+06	4.34101e+06	1.95346e+06	1.23888e+06	2.2497e+06	1.46564e+06	2.49704e+06	17	17	17	37.8	65.33	1	Q08380	Galectin-3-binding protein	LGALS3BP	Cell	sp|P49189|AL9A1_HUMAN
1.72421e+06	2.31567e+06	3.81777e+06	1.10109e+06	2.09454e+06	1.81684e+06	1.57301e+06	2.26001e+06	2.75916e+06	908168	1.5208e+06	2.61703e+06	1.99658e+06	2.60256e+06	1.8563e+06	908924	2.46303e+06	2.03416e+06	2.03798e+06	23	23	22	32.5	85.696	2	P06396	Gelsolin	GSN	Cell	sp|P05387|RLA2_HUMAN
1.51869e+06	1.32357e+06	3.34181e+06	1.29149e+06	1.41827e+06	1.7558e+06	1.90955e+06	1.58439e+06	2.63523e+06	1.38456e+06	1.1286e+06	1.66986e+06	2.10677e+06	1.98829e+06	1.84233e+06	1.93379e+06	2.46867e+06	2.06527e+06	1.87343e+06	12	12	8	60.3	22.11	1	Q06830	Peroxiredoxin-1	PRDX1	Cell	sp|P62906|RL10A_HUMAN
1.62962e+06	1.7142e+06	3.43719e+06	1.49664e+06	1.77428e+06	1.51785e+06	2.04816e+06	2.29045e+06	1.92804e+06	1.17759e+06	1.19551e+06	1.23596e+06	2.85132e+06	2.49741e+06	1.30743e+06	1.50611e+06	2.10021e+06	1.33379e+06	1.84777e+06	11	11	3	37.3	41.792	7	P63261	Actin, cytoplasmic 2	ACTG1	Cell	sp|P52209|6PGD_HUMAN
1.37891e+06	1.78303e+06	2.44228e+06	1.10178e+06	1.72504e+06	1.65443e+06	1.39217e+06	1.8445e+06	2.58512e+06	1.01279e+06	929696	1.48796e+06	1.61455e+06	2.45212e+06	1.96174e+06	791045	1.9287e+06	1.46371e+06	1.6571e+06	10	10	10	37.2	38.177	1	P02750	Leucine-rich alpha-2-glycoprotein	A2GL	Cell	sp|O95336|6PGL_HUMAN
1.92951e+06	1.80267e+06	1.93594e+06	1.45875e+06	1.73079e+06	1.55469e+06	1.86236e+06	1.52799e+06	1.97908e+06	932795	844771	1.37767e+06	3.39175e+06	2.29077e+06	1.66952e+06	1.09652e+06	1.57935e+06	1.12532e+06	1.65651e+06	12	12	12	56	34.814	1	P18065	Insulin-like growth factor-binding protein 2	IGFBP2	Cell	sp|Q13510|ASAH1_HUMAN
2.09207e+06	1.5125e+06	1.91551e+06	1.46168e+06	1.50632e+06	1.36399e+06	1.69858e+06	1.31324e+06	1.64756e+06	1.24784e+06	985571	1.57815e+06	2.27573e+06	1.63018e+06	1.14737e+06	1.1066e+06	1.42912e+06	1.11638e+06	1.46684e+06	9	9	9	45.5	26.855	1	Q92876	Kallikrein-6	KLK6	Cell	sp|Q92484|ASM3A_HUMAN
1.034e+06	1.26789e+06	1.60685e+06	1.11113e+06	1.36144e+06	1.32559e+06	1.29831e+06	1.37243e+06	1.16347e+06	1.27768e+06	1.31269e+06	1.12391e+06	1.70815e+06	2.052e+06	1.03651e+06	1.37214e+06	2.19486e+06	1.17857e+06	1.39786e+06	11	11	10	70.5	18.502	2	P23528	Cofilin-1	CFL1	Cell	sp|Q92485|ASM3B_HUMAN
580324	1.95712e+06	2.46918e+06	485361	1.74718e+06	2.10794e+06	711794	1.53638e+06	2.53192e+06	312414	1.00273e+06	2.166e+06	1.39942e+06	2.71722e+06	1.99312e+06	515388	1.64745e+06	1.35007e+06	1.56769e+06	23	23	23	51	53.879	1	Q02818	Nucleobindin-1	NUCB1	Cell	sp|P63261|ACTG_HUMAN;sp|P60709|ACTB_HUMAN
1.58264e+06	1.75812e+06	1.5845e+06	1.58242e+06	1.54835e+06	917151	1.69364e+06	1.75009e+06	1.32982e+06	1.01089e+06	884069	876746	1.86262e+06	1.67555e+06	945685	1.19064e+06	1.117e+06	822639	1.32647e+06	14	14	14	51	34.985	1	Q12841	Follistatin-related protein 1	FSTL1	Cell	sp|P63267|ACTH_HUMAN;sp|P68133|ACTS_HUMAN;sp|P68032|ACTC_HUMAN;sp|P62736|ACTA_HUMAN
1.03557e+06	825552	1.77896e+06	1.31142e+06	1.0104e+06	1.84284e+06	1.38562e+06	1.188e+06	1.11337e+06	1.09979e+06	851413	1.05171e+06	1.4953e+06	1.49882e+06	960416	1.48373e+06	1.89715e+06	1.40994e+06	1.30614e+06	7	7	7	59.3	15.054	2	P07737	Profilin-1	PFN1	Cell	sp|Q8N9N2|ASCC1_HUMAN
1.44016e+06	1.12868e+06	1.42112e+06	1.23733e+06	1.10959e+06	1.0485e+06	1.42162e+06	990159	1.49976e+06	1.15319e+06	747389	1.17359e+06	1.76214e+06	1.28221e+06	1.00872e+06	1.05207e+06	1.01821e+06	945685	1.17647e+06	13	13	13	15.3	101.13	1	Q08345	Epithelial discoidin domain-containing receptor 1	DDR1	Cell	sp|P07108|ACBP_HUMAN
796878	1.49706e+06	2.78704e+06	635794	1.09477e+06	1.91578e+06	773692	1.30897e+06	2.96028e+06	413893	473958	1.52555e+06	1.14348e+06	1.69776e+06	2.48739e+06	378885	712831	1.16549e+06	1.35133e+06	14	14	14	35.4	47.494	1	Q6WN34	Chordin-like protein 2	CHRDL2	Cell	sp|Q8N1Q8|ACO15_HUMAN
939413	1.54e+06	1.3571e+06	869183	1.39448e+06	901020	1.02949e+06	1.39381e+06	1.37633e+06	640927	793296	980325	1.37633e+06	2.22196e+06	793736	617124	1.0588e+06	720431	1.12143e+06	6	6	6	26.1	29.819	1	P15328	Folate receptor alpha	FOLR1	cell	sp|O75608|LYPA1_HUMAN
991051	806883	1.3885e+06	871959	787161	975106	1.20567e+06	893991	1.05763e+06	891824	612012	740377	1.39787e+06	1.29408e+06	757087	1.1889e+06	1.39014e+06	1.02693e+06	1.01683e+06	9	9	9	42.7	22.391	1	P37802	Transgelin-2	TAGLN2	Cell	sp|P00568|KAD1_HUMAN
579039	877537	1.56074e+06	672046	807498	1.03199e+06	1.05799e+06	1.57935e+06	844302	436978	521533	570632	807275	1.14856e+06	648254	557109	1.05163e+06	620254	870217	18	18	17	34.3	70.288	2	P13796	Plastin-2	LCP1	Cell	sp|Q01518|CAP1_HUMAN
831698	807666	981753	736538	845356	710217	905277	784003	1.02203e+06	683840	568460	790935	1.01567e+06	951735	653125	690748	838586	704090	805296	5	5	5	28.7	22.537	2	P05452	Tetranectin	CLEC3B	Cell	sp|Q9Y653|AGRG1_HUMAN
739915	702335	1.30002e+06	623401	743205	1.19991e+06	537945	438951	949363	578838	540862	1.01328e+06	992976	1.24853e+06	1.16153e+06	473334	850116	904963	838798	7	7	7	44.4	22.086	1	P30044	Peroxiredoxin-5, mitochondrial	PRDX5	Cell	sp|P84077|ARF1_HUMAN;sp|P61204|ARF3_HUMAN;sp|P84085|ARF5_HUMAN
319156	811201	1.65799e+06	305243	792087	703212	389672	942740	1.0378e+06	227357	493435	600831	394892	1.33222e+06	958687	227972	903021	561723	725887	13	13	13	29	50.184	3	P68104	Elongation factor 1-alpha 1	EEF1A1	Cell	sp|P18085|ARF4_HUMAN
1.371e+06	437705	1.51964e+06	941891	410807	408535	1.36257e+06	603377	911890	764099	190456	453361	1.55157e+06	692042	662702	591738	334791	422825	721177	11	11	11	36.4	54.305	2	P04004	Vitronectin	VTN	cell	sp|Q9UKK9|NUDT5_HUMAN
642484	678881	1.69964e+06	456261	513819	363023	871959	746095	762988	396621	329062	371088	1.01433e+06	1.07948e+06	613201	484454	712436	436554	678229	5	5	5	8.8	58.635	1	O00592	Podocalyxin	PODXL	cell	sp|P43652|AFAM_HUMAN
672325	430335	500774	707907	428163	578477	758768	449512	507377	709036	383775	507483	934089	644938	387947	1.03557e+06	745113	503698	600763	5	5	5	27.5	23.207	1	P52565	Rho GDP-dissociation inhibitor 1	ARHGDIA	cell	sp|Q99996|AKAP9_HUMAN
279812	627258	1.2154e+06	202239	543568	669535	401934	770321	775679	168256	437614	449730	375330	824866	483515	324487	766805	649378	569760	13	9	8	18.4	67.819	1	P26038	Moesin	MSN	cell	sp|P24298|ALAT1_HUMAN
741507	334559	1.06683e+06	527752	332524	638532	793076	290444	994216	442679	194660	719732	883763	381917	689791	492546	261400	549515	564349	7	7	7	12.8	97.44	1	Q14118	Dystroglycan	DAG1	Cell	sp|P14550|AK1A1_HUMAN
435949	871354	1.28292e+06	243979	817920	786943	431021	588956	1.13968e+06	116172	161179	458576	360790	1.0345e+06	1.00398e+06	168105	489246	437432	611338	1	1	1	0.7	223.88	1	Q2KJY2	Kinesin-like protein KIF26B	KIF26B	cell	sp|P30837|AL1B1_HUMAN
147760	645832	3.16901e+06	89351.2	694108	755305	185672	876321	1.6389e+06	92598.4	223126	744545	189745	898027	1.36778e+06	77135.1	460838	709282	753975	15	15	15	13.8	129.38	3	P07996	Thrombospondin-1	THBS1	Cell	sp|Q96C23|GALM_HUMAN
504257	557882	780587	421216	503559	470097	509174	454809	715653	303850	263182	405938	608248	573407	441361	345159	428787	416715	482331	5	5	5	21.2	28.048	1	O60259	Kallikrein-8	KLK8	Cell	sp|Q9BQI0|AIF1L_HUMAN
540487	396071	719233	491523	401711	569881	512858	336769	643999	376450	236094	503035	687500	503733	492922	387678	400322	355404	471481	11	11	11	28.2	51.018	1	O43493	Trans-Golgi network integral membrane protein 2	TGOLN2	Cell	sp|P51993|FUT6_HUMAN;sp|P21217|FUT3_HUMAN;sp|Q11128|FUT5_HUMAN
75046.6	1.15551e+06	1.21666e+06	54849.8	986596	671022	93637.6	1.24163e+06	966828	49467.7	783895	645385	104388	1.58747e+06	609050	66460.1	1.655e+06	810527	746964	17	17	11	27	69.412	1	P15311	Ezrin	EZR	Cell	sp|P02763|A1AG1_HUMAN
795113	341683	566533	684172	320819	296362	908168	330663	486844	593093	148850	241925	1.07291e+06	449138	329245	584604	283286	212824	461831	10	10	10	30.2	45.333	1	Q8NBJ4	Golgi membrane protein 1	GOLM1	Cell	sp|P19652|A1AG2_HUMAN
433689	476296	1.21557e+06	201847	436463	447243	307516	439895	719084	183485	221293	468114	408393	678129	571027	156945	439194	373695	455540	4	4	4	17.6	23.787	1	P20827	Ephrin-A1	EFNA1	cell	sp|P01011|AACT_HUMAN
446129	350584	395687	412204	309333	304588	472318	281544	459626	390564	185904	351825	639595	404870	313955	337540	276209	268973	362078	9	9	9	10.8	112.1	2	Q15375	Ephrin type-A receptor 7	EPHA7	Cell	sp|P01009|A1AT_HUMAN
165744	1.42546e+06	384600	88170	683130	236979	99837.9	717888	502966	66709.3	240171	210141	151378	834701	329519	72159.4	372686	276957	393733	3	3	3	16	23.306	1	Q6X4U4	Sclerostin domain-containing protein 1	SOSTDC1	Cell	sp|P04217|A1BG_HUMAN
377182	187665	417466	337470	181486	194000	449419	203307	294600	343941	122430	177887	555721	284723	190535	484286	265951	195811	287453	5	5	5	10.8	43.171	2	P54727	UV excision repair protein RAD23 homolog B	RAD23B	cell	sp|P08697|A2AP_HUMAN
280764	421157	204197	200133	343798	110470	305688	321375	213134	269645	300228	122142	344848	489992	132570	316402	344442	131837	268945	5	4	4	34.3	15.565	1	P29762	Cellular retinoic acid-binding protein 1	CRABP1	Cell	sp|P02765|FETUA_HUMAN
303051	285296	366639	220451	212603	241590	256447	260911	328083	239124	147178	197775	298527	294458	313564	133317	252723	215287	250822	2	2	2	2.7	99.961	1	Q02487	Desmocollin-2	DSC2	Cell	sp|P01023|A2MG_HUMAN
272954	119347	584037	254094	140977	297865	405882	182863	364182	182154	77044.3	241105	434350	178035	258625	243625	221263	287539	263117	5	5	5	49.5	11.74	1	P31949	Protein S100-A11	S100A11	Cell	sp|P49419|AL7A1_HUMAN
161704	231155	564182	126660	222524	285830	188944	197186	425707	94780.3	128972	261110	245200	303513	374992	109882	160221	226853	243983	9	9	9	20.9	46.804	1	Q6PCB0	von Willebrand factor A domain-containing protein 1	VWA1	cell	sp|P04745|AMY1_HUMAN;sp|P19961|AMY2B_HUMAN;sp|P04746|AMYP_HUMAN
157076	NAN	NAN	460072	NAN	NAN	108580	NAN	NAN	102673	NAN	NAN	338642	NAN	NAN	216679	NAN	NAN	245329	2	2	2	0.6	331.77	1	P15924	Desmoplakin	DSP	cell	sp|P06733|ENOA_HUMAN
259145	188656	321754	174021	151936	140635	278922	223963	229877	163667	101063	151179	267634	215063	150364	186964	173142	134617	191380	3	3	3	2.7	97.455	2	P12830	Cadherin-1	CDH1	cell	sp|P00709|LALBA_HUMAN
NAN	157523	544699	NAN	114081	163655	NAN	181965	357529	NAN	60142.6	134337	NAN	286843	381203	NAN	89655.2	140197	217652	6	6	6	29.5	32.444	1	O00560	Syntenin-1	SDCBP	cell	sp|P35475|IDUA_HUMAN
152855	149284	313325	152855	163746	196327	225286	263675	167755	128339	135000	137312	169803	197679	120929	204154	286406	163406	186781	4	4	4	43	10.438	1	Q9H299	SH3 domain-binding glutamic acid-rich-like protein 3	SH3BGRL3	Cell	sp|P54802|ANAG_HUMAN
246222	141869	213252	225411	100421	161536	260966	144519	213252	198063	80897.1	110731	313303	142441	151799	244826	133835	125306	174260	3	3	3	17.9	19.529	1	P49006	MARCKS-related protein	MARCKSL1	Cell	sp|P47710|CASA1_HUMAN
93016.6	232231	235098	88402.5	193517	172615	123222	293968	233457	55196.9	121374	139645	101668	274834	131564	97776.5	286843	176585	174000	4	4	4	8.7	61.174	3	Q9H223	EH domain-containing protein 4	EHD4	Cell	sp|Q9H4A4|AMPB_HUMAN
NAN	NAN	352851	NAN	NAN	98286.1	NAN	NAN	216304	NAN	NAN	100560	NAN	NAN	252373	NAN	NAN	79905.1	183380	2	2	2	2.9	77.737	1	Q9Y653	Adhesion G-protein coupled receptor G1	ADGRG1	Cell	sp|P15144|AMPN_HUMAN
243658	59224.2	NAN	227152	60209.4	NAN	268265	59723	NAN	216995	53029.2	NAN	318206	89680.1	NAN	329861	119819	NAN	163833	2	2	2	22	12.895	1	P58546	Myotrophin	MTPN	cell	sp|P05067|A4_HUMAN
128642	106058	315854	116438	105100	94997.4	218974	157840	173563	115178	75773.2	132002	189508	123051	111038	125846	115162	67678	137886	1	1	1	1.6	63.922	1	Q14956	Transmembrane glycoprotein NMB	GPNMB	cell	sp|P03950|ANGI_HUMAN
118186	213533	133049	128410	255082	72224.5	310149	333933	68770.4	70195.9	123838	32715.8	211442	372324	67476.6	51354.4	356935	49915.5	167726	2	2	2	33.3	4.8054	4	P63313	Thymosin beta-10	TMSB10	cell	sp|Q9BY76|ANGL4_HUMAN
102801	NAN	158234	81482.4	NAN	119338	113529	NAN	165997	90586	NAN	113789	117158	NAN	87871	107368	NAN	109388	114976	2	2	2	10	27.893	1	Q9P0L0	Vesicle-associated membrane protein-associated protein A	VAPA	Cell	sp|P12821|ACE_HUMAN
NAN	NAN	456767	NAN	NAN	52379	NAN	NAN	168478	NAN	NAN	47498.7	NAN	NAN	167163	NAN	NAN	58632	158486	2	2	2	2.4	97.201	1	O43490	Prominin-1	PROM1	Cell	sp|Q9BYF1|ACE2_HUMAN
159103	NAN	NAN	157501	NAN	NAN	129214	NAN	NAN	111393	NAN	NAN	108497	NAN	NAN	66423.2	NAN	NAN	114606	2	2	2	9.4	26.264	1	Q14512	Fibroblast growth factor-binding protein 1	FGFBP1	cell	sp|P01019|ANGT_HUMAN
NAN	110954	NAN	NAN	98204.4	NAN	NAN	97155	NAN	NAN	75359.4	NAN	NAN	129026	NAN	NAN	155915	NAN	111102	2	2	2	16.9	16.368	1	O60869	Endothelial differentiation-related factor 1	EDF1	Cell	sp|P04083|ANXA1_HUMAN
116551	77108.4	NAN	104403	91336.3	NAN	125977	75228.9	NAN	106789	69513.2	NAN	146415	113773	NAN	128223	165171	NAN	109449	2	2	2	23.5	7.4016	1	O00244	Copper transport protein ATOX1	ATOX1	Cell	sp|P07355|ANXA2_HUMAN;sp|A6NMY6|AXA2L_HUMAN
NAN	83269.5	NAN	NAN	69880.4	NAN	NAN	116599	NAN	NAN	53557.5	NAN	NAN	111563	NAN	NAN	175207	NAN	101679	3	3	3	11.9	35.882	1	P09525	Annexin A4	ANXA4	Cell	sp|P12429|ANXA3_HUMAN
99162	88807.9	299895	53546.3	95804.1	58259.3	111609	104482	185184	43294.6	39168.3	83813.8	160187	140382	162187	63089	80701.1	69258.3	108216	1	1	1	2.6	35.97	1	O95274	Ly6/PLAUR domain-containing protein 3	LYPD3	Cell	sp|P09525|ANXA4_HUMAN
NAN	NAN	202337	NAN	NAN	46592.2	NAN	NAN	121576	NAN	NAN	49344.4	NAN	NAN	118860	NAN	NAN	58526.4	99539.3	1	1	1	0.6	167.55	1	P08572	Collagen alpha-2(IV) chain	COL4A2	Cell	sp|P08758|ANXA5_HUMAN
69167.2	57981.3	215287	67205.9	53594.6	118268	102958	62328.3	200925	54607.1	27316.8	90843.8	122337	73823.9	136241	51265.5	51475.6	83581.7	92355.3	3	3	3	6.6	44.96	1	P13473	Lysosome-associated membrane glycoprotein 2	LAMP2	Cell	sp|O95994|AGR2_HUMAN
108957	69253.5	92771.9	103409	89580.7	68713.2	135647	78537.8	96792	73486.9	38279.9	56548.5	203575	107673	66543	75401.2	66806.5	50262.7	86663.6	2	2	2	8.4	25.733	1	Q96S96	Phosphatidylethanolamine-binding protein 4	PEBP4	Cell	sp|P03973|SLPI_HUMAN
NAN	80689.9	NAN	NAN	79540.4	NAN	NAN	123111	NAN	NAN	41181.2	NAN	NAN	116607	NAN	NAN	64759.3	NAN	84314.9	3	3	3	3.3	108.53	1	P12109	Collagen alpha-1(VI) chain	CO6A1	Cell	sp|P01008|ANT3_HUMAN
NAN	NAN	86932	NAN	NAN	95857.3	NAN	NAN	99217	NAN	NAN	57664.7	NAN	NAN	79067.7	NAN	NAN	63567.4	80384.3	1	1	1	2.1	71.689	1	O60216	Double-strand-break repair protein rad21 homolog	RAD21	Cell	sp|P02647|APOA1_HUMAN
70361.6	76020.5	162165	55357.8	65169.1	63062.7	111447	69696.6	124778	45497.5	43644.1	69720.7	172376	128241	82054.8	59491.7	57624.7	53346.3	84687.8	2	2	2	4.8	57.56	3	P13688	Carcinoembryonic antigen-related cell adhesion molecule 1	CEACAM1	cell	sp|P02652|APOA2_HUMAN
NAN	68637.1	186834	NAN	50328.9	62013.7	NAN	74901.1	160732	NAN	18999.8	59673.4	NAN	186072	167465	NAN	40586.2	59984.4	94685.7	1	1	1	4.5	22.109	1	Q7LBR1	Charged multivesicular body protein 1b	CHMP1B	cell	sp|P06727|APOA4_HUMAN
NAN	222832	35469.7	NAN	160365	21436.8	NAN	217537	23518.4	NAN	86667.3	18612.7	NAN	307111	20145.9	NAN	187912	21059.7	110222	4	4	4	5.8	72.313	1	Q9UNQ0	ATP-binding cassette sub-family G member 2	ABCG2	Cell	sp|P04114|APOB_HUMAN
80377.3	126502	52197.8	58827.4	115561	35671.9	74828.5	120669	47792.6	47995.1	72054.5	36240.1	82637	152421	33989.5	51400.7	119000	26791.7	73798.8	2	2	2	5.7	55.454	1	Q96NY8	Nectin-4	NECTIN4	Cell	sp|P05090|APOD_HUMAN
83819.6	32927.4	100951	66885.2	36996.5	60026	101893	38889.7	91399.6	98729.9	25778.8	77247.5	88115	45086.3	45861.6	127311	69436.2	75150.8	69569.8	2	2	2	11	18.795	1	Q969H8	Myeloid-derived growth factor	MYDGF	cell	sp|P02649|APOE_HUMAN
NAN	NAN	177014	NAN	NAN	46071.9	NAN	NAN	117736	NAN	NAN	24759.6	NAN	NAN	29967.3	NAN	NAN	33283	71471.9	2	2	2	1.2	240.85	1	P24821	Tenascin	TNC	Cell	sp|Q9ULZ3|ASC_HUMAN
54042.2	NAN	NAN	47951.9	NAN	NAN	65667.9	NAN	NAN	41892.4	NAN	NAN	64396.7	NAN	NAN	47167.3	NAN	NAN	53415.2	1	1	1	3.6	36.049	1	O14908	PDZ domain-containing protein GIPC1	GIPC1	Cell	sp|P04424|ARLY_HUMAN
NAN	58611.7	NAN	NAN	46453.5	NAN	NAN	54777.7	NAN	NAN	29657.3	NAN	NAN	94047.4	NAN	NAN	40275.1	NAN	53970.4	2	2	2	8.7	23.408	2	P11234	Ras-related protein Ral-B	RALB	Cell	sp|P15289|ARSA_HUMAN
69662.8	45658.6	123813	35676.8	33707.9	34879.7	74347.7	39016.6	69643.4	44977	21653.3	52248.4	80925.1	51536.3	44345.5	104049	42218.9	35514	54953.6	6	3	3	22.9	30.54	1	Q13162	Peroxiredoxin-4	PRDX4	Cell	sp|P17174|AATC_HUMAN
37393.5	NAN	129833	42654.2	NAN	47805.9	113623	NAN	30303.6	53464.7	NAN	21421.9	60468.7	NAN	56736.9	40639.6	NAN	17936.4	55898.9	3	3	3	5.3	57.279	1	Q6UX06	Olfactomedin-4	OLFM4	Cell	sp|Q15121|PEA15_HUMAN
103847	80600.4	41344.3	93119.8	65914.1	22268.2	132268	80182.5	26490.7	69720.7	22362.6	11317.8	128910	78472.5	25668.3	76751.1	61325.5	9618.53	60372.6	1	1	1	2.2	44.882	1	P11279	Lysosome-associated membrane glycoprotein 1	LAMP1	Cell	sp|Q7Z591|AKNA_HUMAN
NAN	40888.3	63229.1	NAN	34807.2	63536.6	NAN	39326.1	82408.2	NAN	20794.3	48476.6	NAN	57167.2	40964.9	NAN	45428.2	52805.5	49152.7	1	1	1	2.1	59.143	1	Q16625	Occludin	OCLN	cell	sp|Q9UNQ0|ABCG2_HUMAN
NAN	45139.4	NAN	NAN	37424.6	NAN	NAN	48265.3	NAN	NAN	20676.4	NAN	NAN	55116.6	NAN	NAN	54271.2	NAN	43482.3	1	1	1	4.4	22.237	1	O43399	Tumor protein D54	TPD52L2	Cell	sp|O75882|ATRN_HUMAN
92188.6	27602.3	42536.1	43150.8	19342.7	50833.8	40806.2	21575.4	128028	58526.4	26138.7	45608	47574.5	25931.2	42409.5	83425.5	35195.4	45592.2	46133.9	8	8	8	11.5	282.39	2	Q86YZ3	Hornerin	HRNR	cell	sp|Q04118|PRB3_HUMAN;sp|P10163|PRB4_HUMAN
142618	NAN	60885	107972	NAN	13602.6	181625	NAN	35523.8	86015	NAN	7808.34	141997	NAN	29579.3	29012.8	NAN	9961.17	63998.3	2	2	2	13.1	21.641	1	P31431	Syndecan-4	SDC4	Cell	sp|Q16620|NTRK2_HUMAN
NAN	33502.9	89742.3	NAN	27619.5	38540.8	NAN	37204.8	66409.4	NAN	21743.6	32752.1	NAN	61295.8	51801.3	NAN	28603.4	30029.6	43270.5	3	3	3	24.7	17.218	1	Q9H4G4	Golgi-associated plant pathogenesis-related protein 1	GLIPR2	Cell	sp|P15291|B4GT1_HUMAN
25027	51411.4	NAN	19843.8	39952.6	NAN	25769.9	48436.3	NAN	22766.1	25909.6	NAN	33115.1	53364.8	NAN	33717.3	66368	NAN	38241.3	2	2	2	11.6	24.327	1	P55327	Tumor protein D52	TPD52	cell	sp|P02749|APOH_HUMAN
30240.6	NAN	NAN	35420.6	NAN	NAN	35156.4	NAN	NAN	27604.2	NAN	NAN	29581.3	NAN	NAN	33144.9	NAN	NAN	32181.5	2	2	2	3.2	99.986	1	Q08554	Desmocollin-1	DSC1	cell	sp|P61769|B2MG_HUMAN
73278.4	13248.1	26422.9	56579.8	12944.9	19470.5	86523.2	13279.4	24735.6	53628	9728.49	18329.8	121517	14425.2	16331.8	55828	18113.8	18597.2	34100.2	2	2	2	12.3	21.627	1	Q9ULZ3	Apoptosis-associated speck-like protein containing a CARD	PYCARD	Cell	sp|P05814|CASB_HUMAN
NAN	21911.5	NAN	NAN	23066.3	NAN	NAN	26802.9	NAN	NAN	14954.6	NAN	NAN	31503	NAN	NAN	33085.2	NAN	25220.6	1	1	1	6.2	40.572	1	Q9UNZ2	NSFL1 cofactor p47	NSFL1C	Cell	sp|P16278|BGAL_HUMAN
21344.8	NAN	NAN	18691.6	NAN	NAN	17089.2	NAN	NAN	13558.4	NAN	NAN	28102.3	NAN	NAN	19720.4	NAN	NAN	19432.4	1	1	1	0.5	248.07	2	Q5D862	Filaggrin-2	FLG2	cell	sp|P15907|SIAT1_HUMAN
NAN	NAN	11983.8	NAN	NAN	13122.9	NAN	NAN	12841.3	NAN	NAN	9836.3	NAN	NAN	11124.9	NAN	NAN	10349	11543	1	1	1	4.5	24.074	1	O75629	Protein CREG1	CREG1	Cell	sp|P08236|BGLR_HUMAN
2194.23	2429.93	15337.8	2282.03	2009.75	17720.1	2687.22	2590.83	17522.2	2034.56	1509.86	13825.1	2633.2	2725.49	17416.9	2261.87	2661.27	17967.5	7389.15	1	1	1	6.9	22.449	1	Q16890	Tumor protein D53	TPD52L1	Cell	sp|P06865|HEXA_HUMAN
2.79342e+06	2.33404e+06	2.97694e+06	2.29936e+06	1.84988e+06	2.03995e+06	3.0416e+06	2.01047e+06	2.81382e+06	2.48153e+06	1.47604e+06	1.91472e+06	3.43434e+06	2.66241e+06	1.80629e+06	2.68111e+06	2.97261e+06	2.32597e+06	2.41889e+06	11	11	11	79.1	21.057	1	P30086	Phosphatidylethanolamine-binding protein 1	PEBP1	Cell	sp|P07686|HEXB_HUMAN
4.95344e+06	8.5821e+06	7.32298e+06	2.6921e+06	7.72712e+06	7.30524e+06	5.24023e+06	7.07059e+06	7.98024e+06	4.7061e+06	6.60488e+06	7.69025e+06	5.91768e+06	8.34453e+06	5.30676e+06	4.21821e+06	8.08827e+06	5.29097e+06	6.47578e+06	27	27	27	66.7	50.222	1	P80303	Nucleobindin-2	NUCB2	Cell	sp|O00462|MANBA_HUMAN
1.74994e+07	2.02105e+07	2.25543e+07	1.32869e+07	1.81014e+07	1.81052e+07	1.89409e+07	1.75626e+07	2.97854e+07	1.09619e+07	1.06378e+07	1.51173e+07	2.01797e+07	2.12742e+07	1.57582e+07	9.28841e+06	1.2813e+07	1.57582e+07	1.70786e+07	31	31	31	47.3	79.321	1	P19835	Bile salt-activated lipase	CEL	Enzyme	sp|P19835|CEL_HUMAN
1.01228e+07	7.14945e+06	1.60492e+07	7.51114e+06	7.35401e+06	7.50437e+06	1.16983e+07	6.32178e+06	9.77659e+06	5.82005e+06	3.28099e+06	6.75021e+06	1.79976e+07	1.62947e+07	1.22961e+07	4.86329e+06	8.03574e+06	6.69754e+06	9.14124e+06	51	51	51	47.3	146.42	2	P47989	Xanthine dehydrogenase/oxidase	XDH	Enzyme	sp|P43251|BTD_HUMAN
5.31044e+06	5.44236e+06	8.09781e+06	4.3335e+06	5.03688e+06	5.55825e+06	6.39184e+06	5.51948e+06	7.19269e+06	4.48632e+06	3.69284e+06	4.78405e+06	7.60017e+06	7.34892e+06	5.20945e+06	4.81065e+06	6.78163e+06	5.37301e+06	5.7447e+06	21	21	18	62	47.168	2	P06733	Alpha-enolase	ENO1	Enzyme	sp|Q10589|BST2_HUMAN
3.76104e+06	4.40405e+06	5.74072e+06	2.77701e+06	4.27917e+06	3.55101e+06	3.81592e+06	4.01119e+06	5.26645e+06	2.30654e+06	2.47483e+06	3.14537e+06	4.94761e+06	5.63897e+06	3.95049e+06	2.3292e+06	4.38942e+06	2.88932e+06	3.87749e+06	32	32	32	45.8	82.577	1	O00391	Sulfhydryl oxidase 1	QSOX1	Enzyme	sp|Q13410|BT1A1_HUMAN
4.15524e+06	4.51971e+06	4.03601e+06	3.63872e+06	3.66124e+06	3.0967e+06	4.9872e+06	4.18356e+06	4.9411e+06	4.01731e+06	2.90257e+06	2.97797e+06	5.18172e+06	3.94092e+06	3.43005e+06	3.01306e+06	2.99101e+06	2.80623e+06	3.78383e+06	23	23	15	61.1	57.767	3	P04745	Alpha-amylase 1	AMY1A	Enzyme	sp|P12830|CADH1_HUMAN
2.39933e+06	2.3568e+06	1.17952e+07	2.33113e+06	3.22887e+06	3.71904e+06	3.00535e+06	4.5047e+06	6.60671e+06	2.33275e+06	1.40886e+06	2.51164e+06	2.42945e+06	4.36455e+06	3.69463e+06	1.3058e+06	2.58799e+06	2.91023e+06	3.59375e+06	58	58	58	26	273.42	1	P49327	Fatty acid synthase	FASN	Enzyme	sp|P0DP25|CALM3_HUMAN;sp|P0DP24|CALM2_HUMAN;sp|P0DP23|CALM1_HUMAN
2.27668e+06	2.76165e+06	3.35481e+06	1.9195e+06	2.74163e+06	1.89229e+06	2.91709e+06	2.48808e+06	3.4066e+06	2.03106e+06	1.92456e+06	1.73295e+06	3.54905e+06	3.50699e+06	2.15089e+06	2.48274e+06	3.17011e+06	2.00894e+06	2.59052e+06	20	20	20	52.1	52.39	1	Q13228	Methanethiol oxidase	SELENBP1	Enzyme	sp|Q9NZT1|CALL5_HUMAN
1.84361e+06	1.74585e+06	3.76182e+06	1.70507e+06	2.09817e+06	2.68781e+06	1.97634e+06	1.93191e+06	2.81968e+06	2.10108e+06	1.73139e+06	2.53262e+06	2.34767e+06	2.63999e+06	1.97867e+06	2.44245e+06	3.2347e+06	2.78955e+06	2.38381e+06	15	15	13	47	39.42	1	P04075	Fructose-bisphosphate aldolase A	ALDOA	Enzyme	sp|P22676|CALB2_HUMAN
1.89294e+06	2.14122e+06	3.64731e+06	1.38591e+06	2.02347e+06	2.18288e+06	1.69835e+06	1.77945e+06	2.75229e+06	1.54685e+06	1.89452e+06	3.42317e+06	1.99977e+06	2.32532e+06	1.9832e+06	1.09979e+06	2.00671e+06	2.78935e+06	2.15762e+06	23	23	23	34.4	80.287	1	P22079	Lactoperoxidase	LPO	Enzyme	sp|P00915|CAH1_HUMAN
2.10472e+06	1.81156e+06	2.83281e+06	1.46097e+06	2.20783e+06	1.89688e+06	2.23215e+06	1.70235e+06	2.29252e+06	2.14048e+06	1.60417e+06	1.62398e+06	2.95495e+06	2.63158e+06	1.27477e+06	1.96596e+06	2.41317e+06	2.14107e+06	2.06983e+06	11	11	10	36.8	36.638	3	P07195	L-lactate dehydrogenase B chain	LDHB	Enzyme	sp|P00918|CAH2_HUMAN
2.15059e+06	1.66697e+06	2.78877e+06	1.7834e+06	1.7072e+06	1.88679e+06	2.37205e+06	1.86094e+06	2.3732e+06	1.82365e+06	1.27538e+06	1.60729e+06	2.81792e+06	2.32065e+06	1.50424e+06	1.99603e+06	2.85073e+06	1.83914e+06	2.0279e+06	15	15	15	56.7	36.053	2	P04406	Glyceraldehyde-3-phosphate dehydrogenase	GAPDH	Enzyme	sp|P23280|CAH6_HUMAN
2.14955e+06	1.06498e+06	2.78202e+06	1.44076e+06	1.48301e+06	1.70224e+06	2.2561e+06	1.49136e+06	2.12864e+06	2.56122e+06	1.43289e+06	2.10545e+06	1.93782e+06	1.64425e+06	1.07172e+06	3.34483e+06	2.09236e+06	1.67822e+06	1.89517e+06	25	25	25	48.6	57.116	1	P07237	Protein disulfide-isomerase	P4HB	Enzyme	sp|P22792|CPN2_HUMAN
1.61544e+06	1.80517e+06	1.89583e+06	1.30616e+06	1.98114e+06	1.28026e+06	1.70862e+06	1.83329e+06	1.78513e+06	1.24551e+06	1.51187e+06	1.51365e+06	1.96896e+06	2.1021e+06	1.15551e+06	1.46047e+06	2.43485e+06	1.33796e+06	1.66626e+06	10	10	10	47.2	23.742	1	P23284	Peptidyl-prolyl cis-trans isomerase B	PPIB	Enzyme	sp|Q9Y646|CBPQ_HUMAN
2.03543e+06	1.02693e+06	1.75422e+06	1.74609e+06	1.25373e+06	1.18602e+06	2.29761e+06	1.27273e+06	1.60997e+06	1.85836e+06	1.06824e+06	1.03049e+06	2.70651e+06	1.5921e+06	951141	2.6826e+06	1.93929e+06	1.2745e+06	1.60297e+06	16	16	16	41.6	36.426	1	P40925	Malate dehydrogenase, cytoplasmic	MDH1	Enzyme	sp|P13688|CEAM1_HUMAN;sp|P31997|CEAM8_HUMAN;sp|P06731|CEAM5_HUMAN
1.57007e+06	1.30218e+06	2.05385e+06	1.39603e+06	1.20391e+06	1.37224e+06	1.73632e+06	1.27071e+06	1.85991e+06	1.54171e+06	1.07791e+06	1.27053e+06	2.14761e+06	1.65374e+06	1.14928e+06	1.7085e+06	1.48806e+06	1.29247e+06	1.50147e+06	21	21	21	39.3	61.448	1	P36871	Phosphoglucomutase-1	PGM1	Enzyme	sp|P31944|CASPE_HUMAN
1.77994e+06	1.469e+06	2.2354e+06	1.42448e+06	1.65248e+06	1.29319e+06	2.15417e+06	1.95875e+06	1.68591e+06	1.18553e+06	910311	1.13338e+06	2.19684e+06	1.9283e+06	1.20441e+06	1.08917e+06	1.59045e+06	874016	1.52858e+06	16	16	16	52.2	44.552	1	P07339	Cathepsin D	CTSD	Enzyme	sp|P04040|CATA_HUMAN
1.49696e+06	1.63959e+06	1.92043e+06	1.15207e+06	1.65672e+06	1.34e+06	1.44556e+06	1.432e+06	1.99893e+06	916960	853896	1.20116e+06	1.90862e+06	2.13944e+06	1.53372e+06	836033	1.81005e+06	1.2138e+06	1.47053e+06	12	12	12	39.4	43.92	1	P15291	Beta-1,4-galactosyltransferase 1	B4GALT1	Enzyme	sp|P07858|CATB_HUMAN
1.62747e+06	1.27018e+06	1.45885e+06	1.34456e+06	1.33361e+06	1.01398e+06	1.55912e+06	1.17042e+06	1.20567e+06	1.02621e+06	845942	972474	2.04164e+06	1.57946e+06	862162	968035	1.21599e+06	793681	1.21541e+06	11	11	11	21.9	63.111	1	P07686	Beta-hexosaminidase subunit beta	HEXB	Enzyme	sp|P07339|CATD_HUMAN
675268	1.19601e+06	1.23502e+06	522981	1.21052e+06	1.006e+06	1.02579e+06	1.2214e+06	1.21111e+06	782700	1.0566e+06	881438	1.03953e+06	1.77883e+06	760453	1.38035e+06	2.30351e+06	1.26701e+06	1.16937e+06	8	8	8	51.5	18.012	7	P62937	Peptidyl-prolyl cis-trans isomerase A	PPIA	Enzyme	sp|P25774|CATS_HUMAN
1.5125e+06	849880	1.47645e+06	917787	960682	1.09857e+06	1.29624e+06	1.03809e+06	1.22998e+06	768241	568066	944899	1.56605e+06	1.20391e+06	997599	792911	1.03708e+06	696711	1.02607e+06	8	8	8	24.5	37.821	1	P07858	Cathepsin B	CTSB	Enzyme	sp|Q9UBR2|CATZ_HUMAN
680766	718785	1.71016e+06	609683	960549	1.10637e+06	904148	907979	1.42527e+06	712732	720730	951669	1.12641e+06	1.19229e+06	884192	859477	1.25156e+06	1.08593e+06	1.00753e+06	11	11	11	47.9	30.791	1	P60174	Triosephosphate isomerase	TPI1	Enzyme	sp|P11717|MPRI_HUMAN
1.11708e+06	809011	1.12602e+06	965890	694252	651633	1.25852e+06	783297	1.0187e+06	1.08142e+06	625912	703212	1.44326e+06	1.04792e+06	638444	1.46138e+06	1.35908e+06	825323	970193	10	9	9	52.5	21.892	1	P32119	Peroxiredoxin-2	PRDX2	Enzyme	sp|Q13740|CD166_HUMAN
764417	672698	1.50236e+06	652446	801976	1.0782e+06	956231	802365	1.18356e+06	720031	689791	931761	1.21852e+06	1.07993e+06	786234	880217	1.15391e+06	1.03989e+06	950007	12	12	12	29.7	44.614	2	P00558	Phosphoglycerate kinase 1	PGK1	Enzyme	sp|P13987|CD59_HUMAN
859835	1.13472e+06	815825	747545	1.11383e+06	670278	944637	1.15936e+06	814695	730285	776324	608121	1.16872e+06	1.60662e+06	547918	968169	1.93406e+06	712436	967856	8	8	8	49.7	19.891	1	Q99497	Protein/nucleic acid deglycase DJ-1	PARK7	Enzyme	sp|P08962|CD63_HUMAN
776271	899959	1.0928e+06	786180	980664	640882	934348	994423	855673	695938	997184	610444	1.3604e+06	1.32063e+06	489110	645698	1.06668e+06	530907	876584	15	15	15	35.7	46.659	1	O75874	Isocitrate dehydrogenase [NADP] cytoplasmic	IDH1	Enzyme	sp|P60033|CD81_HUMAN
1.23083e+06	849762	740171	942609	798205	510163	1.30128e+06	807275	643910	946603	697194	502966	1.7641e+06	1.19742e+06	475637	1.25313e+06	1.24853e+06	604633	899034	14	14	14	60.9	32.66	1	Q15181	Inorganic pyrophosphatase	PPA1	Enzyme	sp|P27701|CD82_HUMAN
1.03751e+06	774390	764046	906093	672512	549820	1.22981e+06	812552	717739	939999	554067	518110	1.39207e+06	1.02323e+06	499387	1.2783e+06	1.03701e+06	545379	836148	5	5	5	31.2	15.936	1	P00441	Superoxide dismutase [Cu-Zn]	SOD1	Enzyme	sp|P21926|CD9_HUMAN
962949	818090	1.44636e+06	739659	638532	655075	1.04959e+06	737304	1.1017e+06	693627	444246	712880	1.22233e+06	889170	683698	727960	564886	684836	812350	15	15	15	17.6	100.89	1	O00462	Beta-mannosidase	MANBA	Enzyme	sp|P60953|CDC42_HUMAN
761033	705702	1.09417e+06	772138	790497	868400	723182	632717	751806	688501	666941	831813	927701	876686	627519	577996	730690	585415	755992	11	11	11	24.9	53.688	1	P04066	Tissue alpha-L-fucosidase	FUCA1	Enzyme	sp|P43121|MUC18_HUMAN
921229	767177	856029	677330	745992	473531	1.00349e+06	747596	664680	784873	492615	458512	1.00363e+06	956231	493743	634737	654621	425559	696491	10	10	10	17.8	60.702	1	P06865	Beta-hexosaminidase subunit alpha	HEXA	Enzyme	sp|P29762|RABP1_HUMAN
918806	548678	943132	774819	487182	633199	1.07447e+06	553069	874864	782917	377312	663851	1.12868e+06	612988	592641	744184	505377	573765	698302	6	6	6	15.6	43.759	1	Q01459	Di-N-acetylchitobiase	CTBS	Enzyme	sp|P29373|RABP2_HUMAN
449637	842840	739095	392491	862043	577515	535156	821386	597550	439865	687214	530025	644580	1.09873e+06	459435	547652	1.13724e+06	574083	675699	10	10	10	41.9	32.118	1	P00491	Purine nucleoside phosphorylase	PNP	Enzyme	sp|O75503|CLN5_HUMAN
570988	749776	823723	522547	725794	436342	705458	686928	728869	503768	570513	459785	819679	1.0168e+06	455724	565670	989472	472842	660805	11	11	11	26.3	58.486	1	P49419	Alpha-aminoadipic semialdehyde dehydrogenase	ALDH7A1	Enzyme	sp|P00450|CERU_HUMAN
482243	423587	1.4164e+06	434170	831871	778210	710020	450510	783732	373384	664634	728566	785908	1.10491e+06	862880	268377	627954	452043	688068	11	11	11	22.6	56.94	1	Q16851	UTP--glucose-1-phosphate uridylyltransferase	UGP2	Enzyme	sp|Q7LBR1|CHM1B_HUMAN
956231	501503	1.02771e+06	740839	458226	652311	943590	439316	996217	657167	263748	624352	1.16323e+06	683082	703797	554412	446283	477950	666690	10	10	10	27.7	50.83	1	Q9HB40	Retinoid-inducible serine carboxypeptidase	SCPEP1	Enzyme	sp|P36222|CH3L1_HUMAN
494908	606648	759768	460008	657258	526072	594534	689218	660455	465558	483146	436312	647940	961415	449450	604172	1.00023e+06	509174	618315	6	6	6	54.3	11.737	1	P10599	Thioredoxin	TXN	Enzyme	sp|Q15782|CH3L2_HUMAN
1.05998e+06	523997	640616	828878	514960	642484	958355	481308	705751	677471	325726	485126	1.11352e+06	590427	518793	676111	516604	426356	625087	7	7	7	12.9	62.081	1	P15586	N-acetylglucosamine-6-sulfatase	GNS	Enzyme	sp|O00299|CLIC1_HUMAN
581371	577315	1.87207e+06	441361	601248	586918	708741	679917	1.19576e+06	306430	201483	450136	933506	1.27822e+06	906596	257533	397143	518110	700734	12	12	12	28.2	53.162	1	P06858	Lipoprotein lipase	LPL	Enzyme	sp|Q6WN34|CRDL2_HUMAN
551232	655983	955436	517967	553107	731602	626302	562347	955370	427333	344442	700391	675080	627954	706338	316841	456894	487486	605934	6	6	6	34.7	20.838	1	P17900	Ganglioside GM2 activator	GM2A	Enzyme	sp|P10909|CLUS_HUMAN
442157	721080	885050	342965	701703	826182	396099	630834	911511	206145	444801	767230	683177	903710	708791	190126	643241	548108	618279	9	9	9	30.2	37.495	1	P25774	Cathepsin S	CTSS	Enzyme	sp|O43405|COCH_HUMAN
821898	470195	631709	611461	506534	337891	930019	453486	555605	810302	331995	336582	965288	625522	338524	828304	583268	348597	568546	6	6	6	25.8	29.48	1	O00584	Ribonuclease T2	RNASET2	Enzyme	sp|P23528|COF1_HUMAN
576436	555451	829683	452450	551117	428549	734142	498661	726599	463015	362645	448671	803701	718187	474352	427303	480241	408677	550791	11	11	11	21.3	82.265	1	P54802	Alpha-N-acetylglucosaminidase	NAGLU	Enzyme	sp|P12109|CO6A1_HUMAN
350560	839459	892938	299605	700342	387275	420370	789347	631840	290605	447026	336932	510765	1.25957e+06	429590	251936	738071	325613	561840	9	9	9	6.4	149.71	1	P12821	Angiotensin-converting enzyme	ACE	Enzyme	sp|P08572|CO4A2_HUMAN
248227	753841	1.20091e+06	199040	723383	483180	308348	736129	894300	190615	537871	549553	349105	847762	613839	163395	731704	494256	575131	9	9	9	38.3	35.366	1	P23280	Carbonic anhydrase 6	CA6	Enzyme	sp|Q9BXJ1|C1QT1_HUMAN
694300	696276	459371	560129	685169	275063	674987	639640	421157	468796	485328	262144	832159	842256	290746	400933	654439	245966	523209	11	11	11	19.8	76.074	1	P16278	Beta-galactosidase	GLB1	Enzyme	sp|P00736|C1R_HUMAN
408422	524542	914548	289399	480874	328925	471076	479177	661738	381600	361842	431589	520883	667496	451323	337587	626476	481308	494728	5	5	5	18	44.839	1	Q8WVQ1	Soluble calcium-activated nucleotidase 1	CANT1	Enzyme	sp|Q9NZP8|C1RL_HUMAN
719333	486911	328834	645653	525489	266394	794947	503873	286187	674052	427925	218474	912396	683840	195390	952329	814638	258213	527973	10	10	10	22.2	52.384	1	P48637	Glutathione synthetase	GSS	Enzyme	sp|P06681|CO2_HUMAN
311960	702773	717142	244132	640749	520486	290283	632848	698984	209356	381256	566768	357306	623833	532824	166620	414496	470423	480605	6	6	6	48.3	16.84	1	P34096	Ribonuclease 4	RNASE4	Enzyme	sp|P01024|CO3_HUMAN
314391	620598	620125	284624	711695	448609	287081	458735	528447	245217	384547	449263	386685	774927	408960	188525	538094	366791	453113	9	9	9	23.9	51.887	1	Q9Y646	Carboxypeptidase Q	CPQ	Enzyme	sp|P0C0L4|CO4A_HUMAN
NAN	402603	860908	NAN	408026	380833	NAN	450948	680059	NAN	159004	226775	NAN	890219	594122	NAN	331466	243371	469028	9	9	9	15.5	61.409	5	P19440	Glutathione hydrolase 1 proenzyme	GGT1	Enzyme	sp|P0C0L5|CO4B_HUMAN
417437	568500	506815	322715	599791	272236	433839	593176	397998	265435	353929	234918	636059	875835	264059	301835	743462	209037	445861	5	5	5	10.1	54.966	4	P78324	Tyrosine-protein phosphatase non-receptor type substrate 1	SIRPA	Enzyme	sp|P02748|CO9_HUMAN
252583	429888	1.10178e+06	195892	424499	550621	272879	373539	884192	151609	256963	545001	366918	555412	684267	184224	359069	423059	456459	9	9	9	21	51.853	1	P53634	Dipeptidyl peptidase 1	CTSC	Enzyme	sp|P10643|CO7_HUMAN
261291	475307	417958	212485	519945	312869	335511	488737	350317	231941	432488	268935	394564	638444	271539	354789	891206	354862	408935	10	10	10	50	25.035	1	P30041	Peroxiredoxin-6	PRDX6	Enzyme	sp|P07357|CO8A_HUMAN
284526	437159	436070	229367	440261	285830	340619	455945	444770	286525	326495	274377	305074	631315	283758	361040	613201	340619	381907	3	3	3	29.2	17.861	2	P68036	Ubiquitin-conjugating enzyme E2 L3	UBE2L3	Enzyme	sp|P07360|CO8G_HUMAN
556183	363703	548184	309740	351241	338689	443754	323521	462310	309891	210696	297721	626606	510411	351265	298920	397474	301312	379143	7	7	7	21.5	49.411	1	Q99538	Legumain	LGMN	Enzyme	sp|P08174|DAF_HUMAN
504572	455819	362821	412119	424881	256003	518362	431769	356836	383031	287599	253232	602332	501086	256838	344800	381547	195485	377915	5	5	5	14.2	37.208	1	P20933	N(4)-(beta-N-acetylglucosaminyl)-L-asparaginase	AGA	Enzyme	sp|P00751|CFAB_HUMAN
459498	439682	404926	499664	438343	246854	462630	423265	323162	323431	263894	222123	546969	583632	251082	321598	501503	206417	379952	5	5	5	10.3	58.314	1	Q9HAT2	Sialate O-acetylesterase	SIAE	Enzyme	sp|P05156|CFAI_HUMAN
NAN	314064	571027	NAN	335720	290283	NAN	380886	441147	NAN	228732	238925	NAN	520919	367173	NAN	492615	307835	374111	7	7	7	15.9	53.165	1	P23381	Tryptophan--tRNA ligase, cytoplasmic	WARS	Enzyme	sp|Q14746|COG2_HUMAN
481508	368218	361842	435345	363400	292992	575238	499907	350754	429233	184582	193866	590141	519261	211852	457179	378832	227389	378825	6	6	6	33.4	31.554	1	P29966	Myristoylated alanine-rich C-kinase substrate	MARCKS	Enzyme	sp|O00244|ATOX1_HUMAN
318758	425471	474846	233102	369266	227704	453109	490740	329587	348259	350341	229447	416888	506043	215317	297411	702920	278419	373463	3	3	3	45.9	11.139	1	P04080	Cystatin-B	CSTB	Enzyme	sp|P08185|CBG_HUMAN
388862	388270	294846	388135	523018	233312	551729	588507	176132	299979	186498	145767	508963	1.37043e+06	131272	507237	671906	207090	421947	12	12	12	27.1	59.755	1	P04040	Catalase	CAT	Enzyme	sp|P19875|CXCL2_HUMAN;sp|P19876|CXCL3_HUMAN
302254	295951	472875	225068	290968	306770	366461	407771	483481	273219	229113	380622	310514	364712	252916	392110	556067	331787	349436	8	8	8	14.9	72.932	1	P13667	Protein disulfide-isomerase A4	PDIA4	Enzyme	sp|P04080|CYTB_HUMAN
153098	537014	767656	89879.2	588262	459212	145433	536121	650189	80160.3	427599	461797	245302	686119	491251	64777.3	542138	377051	420586	8	8	8	16.5	64.732	1	Q10471	Polypeptide N-acetylgalactosaminyltransferase 2	GALNT2	Enzyme	sp|P01034|CYTC_HUMAN
523417	264829	358199	401879	254252	287699	528045	243523	400100	428489	190853	282502	566808	331856	264829	380754	266264	251343	335425	7	7	6	18.5	53.588	1	P15289	Arylsulfatase A	ARSA	Enzyme	sp|Q15828|CYTM_HUMAN
235049	330456	445881	272368	325771	390348	305582	434110	273598	203237	247952	222956	325343	431171	215720	281778	509810	245370	321262	7	7	7	20.8	37.54	1	P37837	Transaldolase	TALDO1	Enzyme	sp|Q96DT6|ATG4C_HUMAN
NAN	204636	980121	NAN	161380	392627	NAN	186731	599126	NAN	173804	474484	NAN	235473	382951	NAN	181914	397667	364243	8	8	8	15.2	56.166	1	P28838	Cytosol aminopeptidase	LAP3	Enzyme	sp|P00167|CYB5_HUMAN
213592	413893	359442	185454	507026	263236	256696	548374	309054	146080	285019	245676	289439	538430	243540	165997	536307	207378	323591	6	6	6	20.1	33.868	1	Q9UBR2	Cathepsin Z	CTSZ	Enzyme	sp|P99999|CYC_HUMAN
211662	355379	423265	137208	306962	305391	257052	331765	442188	180495	226916	265822	257284	510376	287918	227483	437220	285850	308151	8	8	8	38.5	29.246	1	P00918	Carbonic anhydrase 2	CA2	Enzyme	sp|P21399|ACOC_HUMAN
122813	482878	890404	93023	341518	294335	166343	419468	532049	118309	257498	339276	140567	611969	438221	98381.5	385962	326314	349207	10	10	10	26.5	52.878	1	Q96KP4	Cytosolic non-specific dipeptidase	CNDP2	Enzyme	sp|Q9UKF7|PITC1_HUMAN
198255	335209	589119	128624	358894	306856	211574	277129	381045	112721	221616	296444	321754	603377	470945	112440	300103	230675	309325	13	13	13	30.3	55.52	1	P43490	Nicotinamide phosphoribosyltransferase	NAMPT	Enzyme	sp|P28838|AMPL_HUMAN
384760	386016	240037	268358	407997	157752	392301	398605	251570	197953	263492	146313	491864	549706	162920	200133	406135	123513	296745	4	4	4	9.4	54.465	1	P10619	Lysosomal protective protein	CTSA	Enzyme	sp|O75891|AL1L1_HUMAN
274986	322737	276803	232263	270506	197022	339794	277976	251013	275597	256767	223994	342893	402436	173226	301793	371010	178653	276146	10	10	10	41.1	31.121	2	O94760	N(G),N(G)-dimethylarginine dimethylaminohydrolase 1	DDAH1	Enzyme	sp|Q96KP4|CNDP2_HUMAN
NAN	217311	517895	NAN	231941	286664	NAN	261545	281427	NAN	209211	193705	NAN	306303	298527	NAN	287161	215526	275601	5	5	5	11.8	63.146	2	P06744	Glucose-6-phosphate isomerase	GPI	Enzyme	sp|P30046|DOPD_HUMAN;sp|A6NHG4|DDTL_HUMAN
157829	173985	540075	136109	175815	386524	210214	183599	472842	208227	193249	369240	258320	215257	297865	277014	275253	462919	284500	5	5	5	14.1	48.275	1	P14324	Farnesyl pyrophosphate synthase	FDPS	Enzyme	sp|O75618|DEDD_HUMAN
449450	289700	190496	355502	339535	130167	527679	296773	160766	388028	211603	104627	591164	405994	111100	454809	429590	126327	300815	7	7	7	24.3	34.793	1	Q9HC38	Glyoxalase domain-containing protein 4	GLOD4	Enzyme	sp|P51397|DAP1_HUMAN
88543.6	428846	537275	95877.2	419293	337610	78947.2	334698	298092	92163	454998	326834	117557	649514	305370	100261	510482	264389	314836	8	8	8	16.4	53.801	1	P49189	4-trimethylaminobutyraldehyde dehydrogenase	ALDH9A1	Enzyme	sp|Q13011|ECH1_HUMAN
180408	804426	180195	144349	781291	112378	200508	683698	163985	108152	435164	101787	284842	1.24689e+06	122007	123376	803869	91171.8	375770	11	11	11	7.6	212.88	2	P10586	Receptor-type tyrosine-protein phosphatase F	PTPRF	Enzyme	sp|O43583|DENR_HUMAN
244928	244945	NAN	195756	266283	NAN	271840	257230	NAN	197446	200995	NAN	313760	336209	NAN	168852	282032	NAN	248668	6	6	6	9.2	65.471	1	Q8NHP8	Putative phospholipase B-like 2	PLBD2	Enzyme	sp|O00115|DNS2A_HUMAN
271483	323566	304229	191688	325455	153513	315045	294641	257248	218277	180620	178245	355527	455124	165986	183167	252006	144079	252848	7	7	7	14.5	61.132	1	P43251	Biotinidase	BTD	Enzyme	sp|P81605|DCD_HUMAN
NAN	137284	530723	NAN	148479	252426	NAN	119786	400599	NAN	127338	296403	NAN	236388	347054	NAN	271916	321621	265835	4	4	2	30.3	17.149	1	P15531	Nucleoside diphosphate kinase A	NME1	Enzyme	sp|Q08554|DSC1_HUMAN
276496	257284	487655	177173	206116	197734	275845	225286	331926	183370	173732	199054	305688	316227	234430	161525	202491	157752	240782	5	5	5	5.9	105.32	1	P10253	Lysosomal alpha-glucosidase	GAA	Enzyme	sp|Q02487|DSC2_HUMAN
75171.6	608796	379226	51977.5	624395	192420	88623.4	584644	315679	66566.1	385347	205688	83188.7	885910	214423	43777.4	639861	199634	327656	4	4	4	11.9	39.58	1	O00115	Deoxyribonuclease-2-alpha	DNASE2	Enzyme	sp|P15924|DESP_HUMAN
223730	210243	NAN	189916	194068	NAN	302086	198159	NAN	187782	152780	NAN	319399	248692	NAN	234235	271426	NAN	228072	6	6	6	27.5	27.547	1	O95336	6-phosphogluconolactonase	PGLS	Enzyme	sp|P60981|DEST_HUMAN
NAN	211017	274948	NAN	233830	178554	NAN	179385	189337	NAN	197665	169956	NAN	447646	190496	NAN	297020	135290	225429	5	5	5	24.2	25.913	1	Q7Z4W1	L-xylulose reductase	DCXR	Enzyme	sp|P09417|DHPR_HUMAN
283679	188604	212117	220085	198778	135920	350949	199040	146009	265914	170475	129492	376476	298485	108392	332087	328720	150437	224234	5	5	5	43.9	13.941	1	Q9BRA2	Thioredoxin domain-containing protein 17	TXNDC17	Enzyme	sp|Q14195|DPYL3_HUMAN
322737	281544	183854	259415	297164	113011	339441	249227	158805	254129	163825	95155.5	399933	353463	114660	268005	247008	94465.5	227830	11	11	11	22.8	54.341	1	Q9UHL4	Dipeptidyl peptidase 2	DPP7	Enzyme	sp|Q01459|DIAC_HUMAN
235963	139075	291634	206460	139548	207968	265251	138757	280823	217823	118202	191117	294682	200550	174940	240487	257391	225380	211182	2	2	2	30.2	11.776	1	P35754	Glutaredoxin-1	GLRX	Enzyme	sp|P53634|CATC_HUMAN
189824	NAN	NAN	178839	NAN	NAN	205874	NAN	NAN	182533	NAN	NAN	244064	NAN	NAN	212293	NAN	NAN	204721	7	7	7	12.7	68.283	1	Q96G03	Phosphoglucomutase-2	PGM2	Enzyme	sp|Q9UHL4|DPP2_HUMAN
234674	NAN	NAN	153375	NAN	NAN	241439	NAN	NAN	197665	NAN	NAN	275482	NAN	NAN	158640	NAN	NAN	205320	2	2	2	4.4	60.556	1	P22792	Carboxypeptidase N subunit 2	CPN2	Enzyme	sp|Q9NY33|DPP3_HUMAN
30508	583592	457433	26305.9	554566	311852	32044.7	594081	327742	23924.5	385775	275043	37132.6	779884	262999	22112.9	780749	312263	339265	7	7	6	26.9	36.842	1	P09467	Fructose-1,6-bisphosphatase 1	FBP1	Enzyme	sp|Q13443|ADAM9_HUMAN
206517	262981	255312	159213	217673	113490	249192	247522	207234	186188	138921	132066	275807	311139	126642	162311	241707	125480	200758	1	1	1	0.3	350.68	1	Q13315	Serine-protein kinase ATM	ATM	Enzyme	sp|Q9UBS3|DNJB9_HUMAN
266615	121973	218337	218686	136676	154078	335744	144299	213267	334652	117492	146486	299833	167152	123342	389780	210025	160365	205423	5	5	5	7.2	82.588	1	Q9NY33	Dipeptidyl peptidase 3	DPP3	Enzyme	sp|O60216|RAD21_HUMAN
102730	276362	233279	98231.6	266098	167453	113963	270243	204764	96557.5	202983	164246	135244	404421	140023	136496	442495	167303	207068	5	5	5	26.1	21.007	1	O75223	Gamma-glutamylcyclotransferase	GGCT	Enzyme	sp|Q8IVF4|DYH10_HUMAN
157348	280123	283188	110440	244962	193436	130854	255152	263109	118769	131254	172376	140197	358472	207550	96030.2	250508	139451	198581	2	2	2	2.2	90.555	1	Q13443	Disintegrin and metalloproteinase domain-containing protein 9	ADAM9	Enzyme	sp|Q9NP97|DLRB1_HUMAN;sp|Q8TF09|DLRB2_HUMAN
NAN	238578	252653	NAN	186201	123650	NAN	262653	151095	NAN	201917	103337	NAN	337260	127833	NAN	269010	93236	195619	5	5	5	13.7	53.139	1	P52209	6-phosphogluconate dehydrogenase, decarboxylating	PGD	Enzyme	sp|Q5JU00|DRC5_HUMAN
271031	NAN	NAN	165091	NAN	NAN	236094	NAN	NAN	136468	NAN	NAN	260442	NAN	NAN	135779	NAN	NAN	186775	4	4	4	6.2	92.462	1	Q9BYF1	Angiotensin-converting enzyme 2	ACE2	Enzyme	sp|Q14118|DAG1_HUMAN
151557	174274	291493	108309	162378	228067	172364	172233	288238	142352	121753	217055	172783	224787	216289	126897	169662	173997	186055	3	3	3	7.3	51.26	1	Q92484	Acid sphingomyelinase-like phosphodiesterase 3a	SMPDL3A	Enzyme	sp|Q9BUP0|EFHD1_HUMAN
172304	NAN	NAN	145071	NAN	NAN	207449	NAN	NAN	161906	NAN	NAN	247402	NAN	NAN	142826	NAN	NAN	180931	2	2	2	0.4	452.98	1	Q99996	A-kinase anchor protein 9	AKAP9	Enzyme	sp|Q96C19|EFHD2_HUMAN
28174.5	281798	536605	63558.6	341731	735059	68380.6	572335	252864	14636.7	124890	144619	57937.1	448174	279425	35974.8	312761	184300	262062	4	4	4	21.4	22.988	1	P52566	Rho GDP-dissociation inhibitor 2	ARHGDIB	Enzyme	sp|Q12805|FBLN3_HUMAN
168443	103301	459689	151116	95830.7	298154	194095	95764.3	451698	137426	67771.9	272595	217763	116810	260009	134533	89904.1	258302	200280	6	6	6	13.4	62.216	2	Q96PD5	N-acetylmuramoyl-L-alanine amidase	PGLYRP2	Enzyme	sp|Q9H223|EHD4_HUMAN
100428	268842	NAN	96805.4	250978	NAN	129196	263291	NAN	78630.4	162547	NAN	161559	314217	NAN	76422	245625	NAN	186192	5	5	5	7	94.769	1	Q9Y5Y6	Suppressor of tumorigenicity 14 protein	ST14	Enzyme	sp|Q5VTE0|EF1A3_HUMAN;sp|P68104|EF1A1_HUMAN
176157	141221	NAN	128562	136496	NAN	215585	150395	NAN	176732	100310	NAN	187574	190972	NAN	200008	241222	NAN	169916	3	3	3	18	19.206	1	O95881	Thioredoxin domain-containing protein 12	TXNDC12	Enzyme	sp|P13639|EF2_HUMAN
85042.7	227058	213666	71899.8	271238	138853	85154.8	228257	163304	80818.6	196245	137303	119761	333286	103631	153747	474024	157523	185633	4	4	4	16.7	35.869	1	Q14914	Prostaglandin reductase 1	PTGR1	Enzyme	sp|Q9NZ08|ERAP1_HUMAN
176793	120653	NAN	145868	133882	NAN	217884	132773	NAN	185235	100797	NAN	199233	162255	NAN	227058	194593	NAN	165475	3	3	3	8.2	46.247	1	P17174	Aspartate aminotransferase, cytoplasmic	GOT1	Enzyme	sp|P11021|BIP_HUMAN
137693	NAN	NAN	130890	NAN	NAN	208083	NAN	NAN	146780	NAN	NAN	184339	NAN	NAN	137131	NAN	NAN	161445	3	3	3	7.1	39.641	1	O75695	Protein XRP2	RP2	Enzyme	sp|P30040|ERP29_HUMAN
195960	180358	156793	161100	189482	134067	236930	146192	164303	134086	98716.3	119049	260767	209226	118366	142283	124951	87330.6	156706	5	5	5	5.1	113.74	1	O00754	Lysosomal alpha-mannosidase	MAN2B1	Enzyme	sp|Q9BS26|ERP44_HUMAN
292890	45814	496075	237061	58855.9	171756	404646	69494	391540	206445	24675.6	220910	371113	73655.2	218216	222293	53279.8	197405	203720	7	7	7	22.4	41.92	1	Q99536	Synaptic vesicle membrane protein VAT-1 homolog	VAT1	Enzyme	sp|P14625|ENPL_HUMAN
NAN	142688	NAN	NAN	135047	NAN	NAN	130963	NAN	NAN	94531	NAN	NAN	201455	NAN	NAN	210010	NAN	152449	4	2	2	35.5	17.298	2	P22392	Nucleoside diphosphate kinase B	NME2	Enzyme	sp|O60869|EDF1_HUMAN
68556.2	163712	389078	49639.5	222663	202071	103287	202505	236061	51240.6	123231	146242	114644	278554	199137	49756.6	221708	133409	169820	4	4	4	5.9	67.877	1	P29401	Transketolase	TKT	Enzyme	sp|Q92817|EVPL_HUMAN
NAN	NAN	225834	NAN	NAN	120194	NAN	NAN	218913	NAN	NAN	100198	NAN	NAN	155742	NAN	NAN	102389	153878	1	1	1	6.1	28.319	1	Q9H8H3	Methyltransferase-like protein 7A	METTL7A	Enzyme	sp|Q15375|EPHA7_HUMAN
290424	284881	46472.8	236307	327901	37011.9	284960	287081	42248.1	239522	341612	31537.9	347102	407150	32688.6	250387	438404	29671.7	215585	11	11	11	24.6	53.082	1	P34896	Serine hydroxymethyltransferase, cytosolic	SHMT1	Enzyme	sp|P20827|EFNA1_HUMAN
141133	NAN	NAN	122634	NAN	NAN	145454	NAN	NAN	103753	NAN	NAN	202772	NAN	NAN	165928	NAN	NAN	148108	1	1	1	6	22.406	1	P61086	Ubiquitin-conjugating enzyme E2 K	UBE2K	Enzyme	sp|Q9Y2E5|MA2B2_HUMAN
430394	53967.4	142500	385534	74730	62164.4	601373	100407	136913	460934	57421.4	84350	516604	92009.8	71665.9	585943	90913.1	91424.9	212286	5	5	5	9	69.284	1	P09960	Leukotriene A-4 hydrolase	LTA4H	Enzyme	sp|Q08345|DDR1_HUMAN
168864	91564.5	319997	135807	84519.7	206875	153236	94034.3	306452	113191	54800.4	227594	210710	121332	206245	115529	85866	175693	159026	4	4	4	18.3	28.248	1	Q96FE7	Phosphoinositide-3-kinase-interacting protein 1	PIK3IP1	Enzyme	sp|Q96HE7|ERO1A_HUMAN
225068	206359	98081.9	175998	213563	55139.6	235407	195377	70137.6	171625	148623	49460.9	314021	300999	58445.3	270412	266209	55457.7	169725	4	4	4	18.5	20.777	1	Q04760	Lactoylglutathione lyase	GLO1	Enzyme	sp|P27105|STOM_HUMAN
715454	247282	153641	336303	75124.7	213370	173142	190061	103323	258535	30891	34271	198640	47762.8	304968	55089.9	285494	272444	175314	1	1	1	4	27.677	1	Q8N1Q8	Acyl-coenzyme A thioesterase THEM5	Acyl-coenzyme A thioesterase THEM5	Enzyme	sp|Q9H0W9|CK054_HUMAN
72999.6	347270	175328	71447.7	296732	69629	88789.4	465461	82619.8	56107.3	259235	58827.4	103861	469348	57457.2	73334.3	483046	73772.7	190133	5	5	5	18.3	27.566	1	P78417	Glutathione S-transferase omega-1	GSTO1	Enzyme	sp|P23588|IF4B_HUMAN
138998	184186	111416	112948	170203	94491.7	138239	185904	89369.8	140840	121147	116842	164497	248485	70713.6	146465	206617	87852.8	140601	4	2	2	20.1	39.455	1	P09972	Fructose-bisphosphate aldolase C	ALDOC	Enzyme	sp|Q9GZV4|IF5A2_HUMAN;sp|Q6IS14|IF5AL_HUMAN;sp|P63241|IF5A1_HUMAN
NAN	NAN	511296	NAN	NAN	64116.1	NAN	NAN	156858	NAN	NAN	78108.9	NAN	NAN	155096	NAN	NAN	83680.3	174859	3	3	3	9.6	35.385	1	Q8N474	Secreted frizzled-related protein 1	SFRP1	Enzyme	sp|P08294|SODE_HUMAN
NAN	223916	75631.5	NAN	264187	69919.1	NAN	189626	56583.7	NAN	248227	75836.2	NAN	395797	44020.9	NAN	362344	60792.3	172240	3	3	3	9.8	54.861	1	P00352	Retinal dehydrogenase 1	ALDH1A1	Enzyme	sp|P15311|EZRI_HUMAN
NAN	108512	NAN	NAN	118301	NAN	NAN	123470	NAN	NAN	143929	NAN	NAN	173299	NAN	NAN	122066	NAN	131596	4	4	4	5.8	72.595	1	Q9H4A4	Aminopeptidase B	RNPEP	Enzyme	sp|P52907|CAZA1_HUMAN
218853	185621	58526.4	207723	210127	46382.7	293642	165905	57032.6	164531	162795	43150.8	314609	289138	41129.9	222031	276094	44474.8	163701	3	3	3	15.8	22.222	1	P30085	UMP-CMP kinase	CMPK1	Enzyme	sp|P47756|CAPZB_HUMAN
NAN	NAN	201413	NAN	NAN	112051	NAN	NAN	162581	NAN	NAN	107576	NAN	NAN	90372.7	NAN	NAN	119000	132166	3	3	3	6.2	51.657	1	P04424	Argininosuccinate lyase	ASL	Enzyme	sp|P14324|FPPS_HUMAN
116907	93546.8	206990	117949	94563.8	162525	136364	102113	165744	89128.5	57349.8	115866	153236	122992	124838	141241	150823	132460	127514	2	2	2	25	11.951	1	P62942	Peptidyl-prolyl cis-trans isomerase FKBP1A	FKBP1A	Enzyme	sp|P49327|FAS_HUMAN
NAN	NAN	241824	NAN	NAN	92111.9	NAN	NAN	157108	NAN	NAN	100721	NAN	NAN	92457.3	NAN	NAN	85913.7	128356	2	2	2	4.2	56.782	1	P30101	Protein disulfide-isomerase A3	PDIA3	Enzyme	sp|Q01469|FABP5_HUMAN
NAN	73451.3	473695	NAN	74533.4	133687	NAN	119239	271106	NAN	23294.5	98812.1	NAN	182875	223095	NAN	68808.5	105457	154005	3	3	3	2.5	109.54	1	P15144	Aminopeptidase N	ANPEP	Enzyme	sp|O15540|FABP7_HUMAN
192714	83096.5	307239	152600	59220.1	100400	353831	135864	219050	114707	33255.4	69542.1	332018	150218	146161	114034	45086.3	66769.4	146064	4	4	4	12.1	43.5	1	Q15782	Chitinase-3-like protein 2	CHI3L2	Enzyme	sp|P05413|FABPH_HUMAN
104229	196545	NAN	69104.9	166920	NAN	94583.4	179896	NAN	73390.2	113828	NAN	121231	174081	NAN	62827.1	131636	NAN	125822	3	3	3	19	16.55	1	P03950	Angiogenin	ANG	Enzyme	sp|P02794|FRIH_HUMAN
139036	114453	NAN	117378	121038	NAN	151978	101780	NAN	104548	80846.6	NAN	171566	120060	NAN	93358.9	116462	NAN	117588	6	6	6	7.4	113.98	1	Q9Y2E5	Epididymis-specific alpha-mannosidase	MAN2B2	Enzyme	sp|Q9UGM5|FETUB_HUMAN
80488.8	105297	178603	67603	175255	95314	117313	123890	91520	84385.1	127939	128437	148747	226178	84098.9	112807	194054	43243.6	123805	5	5	5	9.5	61.963	4	Q14195	Dihydropyrimidinase-related protein 3	DPYSL3	Enzyme	sp|P02671|FIBA_HUMAN
NAN	99189.5	NAN	NAN	112948	NAN	NAN	203349	NAN	NAN	52150.7	NAN	NAN	160966	NAN	NAN	119124	NAN	124621	1	1	1	2.2	51.804	1	Q02790	Peptidyl-prolyl cis-trans isomerase FKBP4	FKBP4	Enzyme	sp|P02675|FIBB_HUMAN
104461	NAN	NAN	96765.2	NAN	NAN	135037	NAN	NAN	93229.6	NAN	NAN	140713	NAN	NAN	111046	NAN	NAN	115358	2	2	2	7.8	24.579	2	P00492	Hypoxanthine-guanine phosphoribosyltransferase	HPRT1	Enzyme	sp|P02679|FIBG_HUMAN
34848.3	107980	493195	53150.7	122413	188343	48587.6	132039	244504	27800.1	76036.3	202590	48165.1	185750	284132	38862.7	133391	143173	148830	6	6	6	7.8	95.337	1	P13639	Elongation factor 2	EEF2	Enzyme	sp|Q14512|FGFP1_HUMAN
194606	111239	128874	142826	112557	55089.9	261618	118531	126888	163010	68846.7	52768.9	274567	150677	75710.2	160021	92316.4	54599.5	126479	3	3	3	4.1	74.731	1	P08236	Beta-glucuronidase	GUSB	Enzyme	sp|Q5CZC0|FSIP2_HUMAN
NAN	141830	178814	NAN	112261	55093.7	NAN	146455	112870	NAN	119132	58798.8	NAN	214557	59011.2	NAN	180383	87252	122205	1	1	1	5.7	15.188	1	Q6ZSK4	Putative uncharacterized protein NTM-AS1	NTM-AS1	Enzyme	sp|P20930|FILA_HUMAN;CON__P20930
76152.3	80265.9	376033	50106.1	79128	225364	88851	65341	361341	56969.4	45340.1	219887	111339	83119.5	219856	62653.2	69662.8	213193	141674	2	2	2	10.8	22.763	1	P45877	Peptidyl-prolyl cis-trans isomerase C	PPIC	Enzyme	sp|Q5D862|FILA2_HUMAN;CON__Q5D862
73701.2	265398	130176	64889.6	214185	60750.1	77941.3	291917	85788.7	56501.4	178802	56815.6	97384.2	342846	66797.2	60205.2	258732	42936	138357	3	3	3	17.2	36.431	1	Q16651	Prostasin	PRSS8	Enzyme	sp|P30043|BLVRB_HUMAN
92604.8	139567	117614	87185.5	148181	85255.2	104432	147096	92739.7	83726.7	100679	68518.2	118563	212338	62549	114684	225896	56827.4	115638	2	2	2	8.3	24.669	1	O75608	Acyl-protein thioesterase 1	LYPLA1	Enzyme	sp|P15328|FOLR1_HUMAN
NAN	NAN	119380	NAN	NAN	101070	NAN	NAN	135140	NAN	NAN	97620.7	NAN	NAN	83871.9	NAN	NAN	101879	106494	1	1	1	6.4	31.236	1	Q13126	S-methyl-5'-thioadenosine phosphorylase	MTAP	Enzyme	sp|Q8NFU4|FDSCP_HUMAN
328470	102127	120728	206660	92329.2	51754.6	390158	111162	74332.2	159290	45117.5	44017.8	547728	124053	67908.3	108882	78750.4	42725.2	139278	4	4	4	17.7	25.552	1	P22352	Glutathione peroxidase 3	GPX3	Enzyme	sp|Q12841|FSTL1_HUMAN
126906	187665	84836.6	91977.9	228400	37976	115714	182495	64214	81043	166366	40479.4	174456	345278	47849	81606.7	219932	37779.1	128710	3	3	3	4.6	61.247	1	O14773	Tripeptidyl-peptidase 1	TPP1	Enzyme	sp|P09467|F16P1_HUMAN
36072.2	381520	115034	30177.8	309762	108309	37779.1	298837	78478	26575.3	227341	49122.6	54652.5	380886	104562	29896.7	293256	66727.8	152525	11	11	11	13.6	98.398	1	P21399	Cytoplasmic aconitate hydratase	ACO1	Enzyme	sp|O00757|F16P2_HUMAN
42840.9	NAN	401016	44357.8	NAN	219765	56212.4	NAN	206947	28980.6	NAN	119902	83171.4	NAN	213119	34228.3	NAN	126713	139492	4	4	4	11.2	51.901	1	Q01518	Adenylyl cyclase-associated protein 1	CAP1	Enzyme	sp|P04075|ALDOA_HUMAN
35251.6	90454.2	NAN	27803.9	135187	NAN	51063.3	92624.1	NAN	89462.8	261872	NAN	41453.3	165011	NAN	96390.3	446562	NAN	136171	1	1	1	3.4	28.87	1	P00915	Carbonic anhydrase 1	CA1	Enzyme	sp|P09972|ALDOC_HUMAN
28587.6	144981	321621	26627	145928	135169	41424.6	143431	203674	27956.6	82941.1	130040	54998.3	225161	160110	33577.3	125220	119272	124831	3	3	3	19.6	20.987	3	P62834	Ras-related protein Rap-1A	RAP1A	Enzyme	sp|P16930|FAAA_HUMAN
169662	116891	115762	106523	114382	68257.5	161660	83379.2	96745	86793.5	82049.1	62449.4	279405	133937	69066.6	91285.6	77338.5	66276	106600	3	3	3	5.6	59.716	1	P04062	Glucosylceramidase	GBA	Enzyme	sp|Q96GK7|FAH2A_HUMAN;sp|Q6P2I3|FAH2B_HUMAN
NAN	117264	117826	NAN	111108	74880.4	NAN	158904	94008.3	NAN	85338	56169.5	NAN	171007	47203.3	NAN	179958	67495.3	106764	2	2	2	5.5	35.816	1	Q13011	Delta(3,5)-Delta(2,4)-dienoyl-CoA isomerase, mitochondrial	ECH1	Enzyme	sp|P17931|LEG3_HUMAN
407291	19493.4	240187	311744	15934.9	142579	464011	19794.3	197323	333263	11343.7	119338	515817	25684.3	115209	328470	27146.9	110739	176357	5	5	5	38.1	12.712	2	P30046	D-dopachrome decarboxylase	DDT	Enzyme	sp|Q08380|LG3BP_HUMAN
110241	NAN	111031	92194.9	NAN	70376.2	119413	NAN	82682.8	109631	NAN	64544.2	145706	NAN	63934.2	132103	NAN	77666.2	97207.5	2	2	2	13.8	19.108	1	O43598	2'-deoxynucleoside 5'-phosphate N-hydrolase 1	DNPH1	Enzyme	sp|P31644|GBRA5_HUMAN
129026	90110	110210	106132	83321.4	88206.7	125707	75820.5	112292	98976.6	57728.7	81708.6	138969	86110.4	71725.6	83021.7	78641.3	57909	90975.9	5	5	5	11.1	54.066	1	Q9BTY2	Plasma alpha-L-fucosidase	FUCA2	Enzyme	sp|O75223|GGCT_HUMAN
147239	65576.9	113584	100282	55762.2	64468.2	197200	66917.7	83953.3	141026	51776.1	62544.7	190364	82745.9	60581.9	158212	93988.7	61363.8	97079.2	3	3	3	15.5	22.119	1	P30043	Flavin reductase (NADPH)	BLVRB	Enzyme	sp|P17900|SAP3_HUMAN
79788.9	62306.7	136723	98436.1	76735.2	118876	96825.5	65677	96370.2	110203	54899.3	85741.1	155365	117427	99464.9	63387	64795.2	61914.9	92067.5	2	2	2	6.4	29.931	1	Q9NV23	S-acyl fatty acid synthase thioesterase, medium chain	OLAH	Enzyme	sp|P51161|FABP6_HUMAN
NAN	NAN	181826	NAN	NAN	41127.1	NAN	NAN	172400	NAN	NAN	113663	NAN	NAN	69148	NAN	NAN	42924.1	103515	1	1	1	2.3	43.963	1	Q9NWT1	p21-activated protein kinase-interacting protein 1	PAK1IP1	Enzyme	sp|O60603|TLR2_HUMAN
57780.7	NAN	123993	56470.1	NAN	131664	59084.8	NAN	154634	50234.8	NAN	107711	72234.5	NAN	100958	46382.7	NAN	111757	92284	1	1	1	4	46.198	1	Q9H497	Torsin-3A	TOR3A	Enzyme	sp|O60547|GMDS_HUMAN
126204	46398.8	156695	125480	61508.6	36911.9	136676	49763.5	151221	101119	38166	73972.4	177345	75815.2	62147.1	149543	72994.5	86907.9	94274.5	4	4	4	10.7	54.636	1	P24298	Alanine aminotransferase 1	GPT	Enzyme	sp|P06396|GELS_HUMAN;CON__Q3SX14
NAN	92894.1	NAN	NAN	69822.3	NAN	NAN	90680.2	NAN	NAN	53683.8	NAN	NAN	101421	NAN	NAN	102973	NAN	85245.7	2	2	2	3.9	50.509	1	Q6P531	Glutathione hydrolase 6	GGT6	Enzyme	sp|P06744|G6PI_HUMAN
NAN	66391	153215	NAN	59532.9	88820.2	NAN	68894.4	116341	NAN	42977.7	79320.2	NAN	91386.9	78461.6	NAN	98136.4	94859.2	86528.1	2	1	1	5	36.743	1	O00757	Fructose-1,6-bisphosphatase isozyme 2	FBP2	Enzyme	sp|P04062|GLCM_HUMAN
128910	NAN	111617	107748	NAN	66801.8	136241	NAN	90711.6	57989.3	NAN	60209.4	285672	NAN	67993.1	45690.3	NAN	32743	96674.2	1	1	1	2.4	52.497	1	Q96DT6	Cysteine protease ATG4C	ATG4C	Enzyme	sp|Q9Y3R0|GRIP1_HUMAN
248244	27013.6	252601	212235	23373.7	77736.3	261908	29091.3	171875	184364	14947.3	87974.6	315898	37261.5	119272	144109	21644.3	73962.2	120898	4	4	4	12.7	50.813	1	Q92485	Acid sphingomyelinase-like phosphodiesterase 3b	SMPDL3B	Enzyme	sp|P35754|GLRX1_HUMAN
65645.1	NAN	121072	55492.3	NAN	88298.4	89147.1	NAN	102937	81601	NAN	81284.9	67043	NAN	91469.3	68092.1	NAN	62436.4	82624.8	3	3	3	13	35.503	1	P40926	Malate dehydrogenase, mitochondrial	MDH2	Enzyme	sp|P19440|GGT1_HUMAN;sp|A6NGU5|GGT3_HUMAN;sp|P36268|GGT2_HUMAN
73207.3	81975.2	NAN	66220.9	75255	NAN	89116.2	77596.3	NAN	64772.8	43234.6	NAN	120619	118802	NAN	71790.2	82334	NAN	81065.1	1	1	1	4.6	21.635	1	P00568	Adenylate kinase isoenzyme 1	AK1	Enzyme	sp|Q6P531|GGT6_HUMAN
NAN	69778.7	162108	NAN	80093.6	85658	NAN	131591	62905.6	NAN	67997.8	65160	NAN	83489.1	51436.3	NAN	84379.2	46193.4	82565.9	5	4	4	16.3	36.688	1	P00338	L-lactate dehydrogenase A chain	LDHA	Enzyme	sp|P22352|GPX3_HUMAN
NAN	161783	NAN	NAN	80104.7	NAN	NAN	87385.1	NAN	NAN	38418.1	NAN	NAN	64957.1	NAN	NAN	74698.9	NAN	84557.8	1	1	1	1.3	82.593	1	P46459	Vesicle-fusing ATPase	NSF	Enzyme	sp|P78417|GSTO1_HUMAN
NAN	87366.9	NAN	NAN	59661	NAN	NAN	87494.2	NAN	NAN	46728	NAN	NAN	99409.8	NAN	NAN	94590	NAN	79208.3	1	1	1	5.3	27.399	1	P60900	Proteasome subunit alpha type-6	PSMA6	Enzyme	sp|P09211|GSTP1_HUMAN
149906	58733.7	191781	93494.9	86116.4	73772.7	128820	109563	96590.9	48621.3	27892.7	53235.5	161268	93865	77081.7	51579.1	63321.2	41551.1	85722.8	4	4	4	13.4	44.659	1	Q13510	Acid ceramidase	ASAH1	Enzyme	sp|P48637|GSHB_HUMAN
52393.5	60826	136392	50672	73706.3	109313	58005.4	71566.7	146557	48823.9	50890.2	98887.5	69172	94308.5	78684.9	40800.5	84866.1	101837	80900.5	5	5	5	20.4	31.806	1	Q00169	Phosphatidylinositol transfer protein alpha isoform	PITPNA	Enzyme	sp|P04406|G3P_HUMAN
94393.5	52926.4	NAN	73573.6	51543.4	NAN	101583	66262.3	NAN	77860.3	40403.7	NAN	110892	73619.5	NAN	112253	103001	NAN	78538.1	4	4	4	10.3	41.564	1	Q15435	Protein phosphatase 1 regulatory subunit 7	PPP1R7	Enzyme	sp|Q9HC38|GLOD4_HUMAN
36464.4	25392.2	372427	43659.3	32390.9	208994	59516.4	39135.8	273181	31203.1	22449.6	150062	87088.8	63220.3	199247	51052.7	40814.7	151410	108897	4	4	4	20.3	21.45	3	P63000	Ras-related C3 botulinum toxin substrate 1	RAC1	Enzyme	sp|Q92896|GSLG1_HUMAN
NAN	55519.2	133132	NAN	55469.2	87718.9	NAN	59093	114152	NAN	45349.5	86062.7	NAN	69542.1	72104.4	NAN	74003.2	78076.5	77518.6	1	1	1	4.8	22.345	1	Q96IU4	Protein ABHD14B	ABHD14B	Enzyme	sp|Q8NBJ4|GOLM1_HUMAN
135996	49829.1	223529	118802	45368.4	40233.2	196613	46991.1	65978.1	121694	40141.3	54316.4	175134	55350.2	40166.4	146202	59462.8	43844.2	89626.8	3	3	3	15.4	25.851	1	P08294	Extracellular superoxide dismutase [Cu-Zn]	SOD3	Enzyme	sp|Q9H4G4|GAPR1_HUMAN
150583	81584.1	61807.7	141889	73085.6	45957.1	158585	83356.1	50784.5	110608	41401.6	47321.2	220528	90473	45737.8	100693	60809.1	29238.9	84932.9	5	5	5	12.8	54.163	1	Q9H3G5	Probable serine carboxypeptidase CPVL	CPVL	Enzyme	sp|Q9NZH0|GPC5B_HUMAN
NAN	63373.8	108603	NAN	66198	85717.4	NAN	59072.5	111169	NAN	42084.5	76543.9	NAN	75657.7	68513.5	NAN	64142.8	72666.4	74478.5	1	1	1	1.7	72.669	1	P35475	Alpha-L-iduronidase	IDUA	Enzyme	sp|P28799|GRN_HUMAN
NAN	83767.3	NAN	NAN	79424.7	NAN	NAN	69354.4	NAN	NAN	37302.9	NAN	NAN	93605.1	NAN	NAN	79966	NAN	73903.4	2	2	2	5	38.681	1	Q9NX62	Inositol monophosphatase 3	IMPAD1	Enzyme	sp|P30047|GFRP_HUMAN
NAN	76528	NAN	NAN	55855	NAN	NAN	72144.4	NAN	NAN	31461.5	NAN	NAN	175085	NAN	NAN	49474.6	NAN	76758.2	1	1	1	2.3	45.664	2	P63092	Guanine nucleotide-binding protein G(s) subunit alpha isoforms short	GNAS	Enzyme	sp|Q9NR31|SAR1A_HUMAN;sp|Q9Y6B6|SAR1B_HUMAN
87573.1	NAN	55785.4	72415	NAN	49515.8	88378	NAN	63646.8	68466	NAN	49224.9	112667	NAN	40102.4	63286.1	NAN	43496.1	64271.2	2	2	2	4.7	43.001	1	O95084	Serine protease 23	PRSS23	Enzyme	sp|Q9HAV0|GBB4_HUMAN;sp|P62879|GBB2_HUMAN;sp|P62873|GBB1_HUMAN
35042.1	NAN	155699	25183.7	NAN	82054.8	44011.7	NAN	137999	28647.1	NAN	91424.9	39748.1	NAN	82659.9	34034.3	NAN	80260.4	72883.9	3	3	3	10.1	37.393	1	P09668	Pro-cathepsin H	CTSH	Enzyme	sp|P63092|GNAS2_HUMAN;sp|Q5JWF2|GNAS1_HUMAN
88869.5	42465.4	NAN	68200.8	39473.6	NAN	105934	42793.4	NAN	94944.7	28724.6	NAN	105831	55580.8	NAN	78592.3	45677.6	NAN	64383.4	3	3	3	15.3	31.674	1	Q8NCW5	NAD(P)H-hydrate epimerase	NAXE	Enzyme	sp|P00738|HPT_HUMAN;sp|P00739|HPTR_HUMAN
58913.1	40698.8	NAN	55990.7	47584.4	NAN	73793.2	68884.9	NAN	60531.6	21212.1	NAN	61321.3	104280	NAN	95023.7	64822.2	NAN	63103.9	1	1	1	9.6	11.999	1	P61457	Pterin-4-alpha-carbinolamine dehydratase	PCBD1	Enzyme	sp|P48723|HSP13_HUMAN
27162	107219	121593	15140.2	74585.1	71810.1	26093.4	115489	105340	18860.8	57477.1	53836.6	26379	105530	64885.1	19079	112839	81245.5	69259	1	1	1	11.3	8.4661	1	Q969W0	Serine palmitoyltransferase small subunit A	SPTSSA	Enzyme	sp|P0DMV9|HS71B_HUMAN;sp|P0DMV8|HS71A_HUMAN
NAN	53324.1	74771.5	NAN	69311.2	49224.9	NAN	65695.2	70137.6	NAN	43001.5	45928.4	NAN	56274.7	41315.6	NAN	66778.7	46270.3	56836.1	3	3	3	11.4	37.765	1	Q96C23	Aldose 1-epimerase	GALM	Enzyme	sp|P17066|HSP76_HUMAN;sp|P48741|HSP77_HUMAN
34328	NAN	196014	27445.8	NAN	52893.4	37109.5	NAN	123273	21215	NAN	83552.8	50033.3	NAN	67739	32743	NAN	55677.2	67972.4	3	3	3	14.1	26.411	1	P28066	Proteasome subunit alpha type-5	PSMA5	Enzyme	sp|P11142|HSP7C_HUMAN
62848.9	NAN	NAN	40021.8	NAN	NAN	78125.2	NAN	NAN	45136.3	NAN	NAN	101421	NAN	NAN	33403.2	NAN	NAN	59621.6	1	1	1	1.9	52.025	1	Q15904	V-type proton ATPase subunit S1	ATP6AP1	Enzyme	sp|P04792|HSPB1_HUMAN
NAN	26296.8	152273	NAN	27260	106103	NAN	24060.9	132213	NAN	15055.5	100330	NAN	35583	103130	NAN	29192.3	102013	71125.8	1	1	1	0.5	250.79	1	Q9H4A3	Serine/threonine-protein kinase WNK1	WNK1	Enzyme	sp|P08238|HS90B_HUMAN
77800.9	52509.8	92714	61713.6	51668.6	39078.8	78652.2	53758.3	59101.2	58114.1	21617.3	24346	87585.2	98818.9	46059.1	70689.1	48061.7	35984.8	57674.9	3	3	3	3.7	89.837	1	O60603	GDP-mannose 4,6 dehydratase	TLR2	Enzyme	sp|Q9NRV9|HEBP1_HUMAN
36333.2	68880.1	NAN	30745.8	58340.1	NAN	46411.7	63620.3	NAN	26037.4	48238.6	NAN	74564.4	93074.6	NAN	38674.6	74414.7	NAN	56636.6	3	3	3	12.2	35.206	1	Q08257	Quinone oxidoreductase	CRYZ	Enzyme	sp|Q9Y5Z4|HEBP2_HUMAN
NAN	NAN	70069.5	NAN	NAN	54610.9	NAN	NAN	59922.1	NAN	NAN	41799.6	NAN	NAN	39994.1	NAN	NAN	47423	52303.2	1	1	1	3	38.946	1	Q9NX46	Poly(ADP-ribose) glycohydrolase ARH3	ADPRHL2	Enzyme	sp|P69905|HBA_HUMAN
81521.9	35386.2	93813	89562.1	27043.6	103309	131154	52158	42344.9	43109	12476.3	24907.6	120427	39054.5	43571.6	72550.6	20573.5	38663.9	58241.4	1	1	1	3.7	28.518	1	P08246	Neutrophil elastase	ELANE	Enzyme	sp|P68871|HBB_HUMAN
NAN	NAN	170286	NAN	NAN	23096.7	NAN	NAN	75710.2	NAN	NAN	29028.9	NAN	NAN	49791.1	NAN	NAN	26955.6	62478.1	2	2	2	1.6	106.87	1	Q14697	Neutral alpha-glucosidase AB	GANAB	Enzyme	sp|P02042|HBD_HUMAN
97438.2	NAN	74693.8	80293.7	NAN	20742.5	215033	NAN	29528.1	80260.4	NAN	13522.7	177014	NAN	15103.5	104671	NAN	11258.3	74738.2	2	2	2	9.9	24.75	1	P04179	Superoxide dismutase [Mn], mitochondrial	SOD2	Enzyme	sp|P02790|HEMO_HUMAN
46139	NAN	NAN	34271	NAN	NAN	65322.8	NAN	NAN	49718.7	NAN	NAN	58037.6	NAN	NAN	36835.3	NAN	NAN	48837.1	1	1	1	7	26.182	1	P15374	Ubiquitin carboxyl-terminal hydrolase isozyme L3	UCHL3	Enzyme	sp|P04196|HRG_HUMAN
33308.4	78006.1	70498.3	23749.3	84098.9	34373.3	43348.7	66649.2	60009.4	21093.3	50054.1	39000.4	53616.9	102488	44706.6	18547	72938.9	33626.2	52753.2	1	1	1	4.5	41.859	3	P51993	Alpha-(1,3)-fucosyltransferase 6	FUT6	Enzyme	sp|P16403|H12_HUMAN;sp|P10412|H14_HUMAN;sp|P16402|H13_HUMAN;sp|P22492|H1T_HUMAN;sp|Q02539|H11_HUMAN
31255	52346.3	102517	25768.1	51233.5	42562.6	42769.7	59756.2	69378.5	25115.7	35642.2	40896.8	47935.3	81358.2	49013.8	21635.3	51279.7	42589.2	49517.5	5	5	5	27	25.789	1	P09417	Dihydropteridine reductase	QDPR	Enzyme	sp|Q99878|H2A1J_HUMAN;sp|Q96KK5|H2A1H_HUMAN;sp|Q71UI9|H2AV_HUMAN;sp|P0C0S5|H2AZ_HUMAN;sp|Q9BTM1|H2AJ_HUMAN;sp|Q16777|H2A2C_HUMAN;sp|Q93077|H2A1C_HUMAN;sp|Q7L7L0|H2A3_HUMAN;sp|Q6FI13|H2A2A_HUMAN;sp|P20671|H2A1D_HUMAN;sp|P0C0S8|H2A1_HUMAN;sp|P04908|H2A1B_HUMAN;sp|Q96QV6|H2A1A_HUMAN;sp|P16104|H2AX_HUMAN;sp|Q8IUE6|H2A2B_HUMAN
44317.8	42799.3	104671	27771.2	45355.8	33836.7	61020.2	47301.6	62844.5	35890.1	33257.7	39958.1	69953.1	62609.8	41938.9	31987	44684.9	37760.8	48449.4	1	1	1	1.4	107.23	1	Q9NZ08	Endoplasmic reticulum aminopeptidase 1	ERAP1	Enzyme	sp|P62805|H4_HUMAN
NAN	41733	106198	NAN	48496.7	31374.4	NAN	47209.8	60939.9	NAN	24374.8	32623	NAN	75799.5	44456.3	NAN	47706.6	32543.9	49454.7	1	1	1	9.8	14.326	1	P03973	Antileukoproteinase	SLPI	Enzyme	sp|P17693|HLAG_HUMAN
36888.9	42359.6	NAN	35728.8	48068.4	NAN	48015.1	41568.4	NAN	32408.8	32777.1	NAN	49081.8	68210.2	NAN	41372.9	68956.6	NAN	46231.6	2	2	2	6	46.374	1	P16930	Fumarylacetoacetase	FAH	Enzyme	sp|P04233|HG2A_HUMAN
69527.7	NAN	NAN	58518.3	NAN	NAN	49132.8	NAN	NAN	24077.5	NAN	NAN	57254.4	NAN	NAN	42725.2	NAN	NAN	46341.7	1	1	1	4.9	34.193	1	P50897	Palmitoyl-protein thioesterase 1	PPT1	Enzyme	sp|P01903|DRA_HUMAN;sp|P01906|DQA2_HUMAN
NAN	NAN	56611.2	NAN	NAN	36303	NAN	NAN	54455.9	NAN	NAN	39249.9	NAN	NAN	40865.6	NAN	NAN	36937.5	44070.5	2	1	1	4.2	58.025	1	P34059	N-acetylgalactosamine-6-sulfatase	GALNS	Enzyme	sp|Q95IE3|2B1C_HUMAN;sp|Q5Y7A7|2B1D_HUMAN;sp|P20039|2B1B_HUMAN;sp|P01912|2B13_HUMAN;sp|P01911|2B1F_HUMAN;sp|P04440|DPB1_HUMAN
NAN	NAN	142975	NAN	NAN	27823.2	NAN	NAN	44616.8	NAN	NAN	29192.3	NAN	NAN	38639.8	NAN	NAN	26406.4	51608.9	2	2	2	3.2	72.968	1	P33908	Mannosyl-oligosaccharide 1,2-alpha-mannosidase IA	MAN1A1	Enzyme	sp|Q9GIY3|2B1E_HUMAN;sp|Q30134|2B18_HUMAN;sp|Q29974|2B1G_HUMAN;sp|P04229|2B11_HUMAN;sp|Q30167|2B1A_HUMAN;sp|P13762|DRB4_HUMAN;sp|Q9TQE0|2B19_HUMAN;sp|Q30154|DRB5_HUMAN;sp|P79483|DRB3_HUMAN;sp|P13761|2B17_HUMAN;sp|P13760|2B14_HUMAN
NAN	37228	106272	NAN	34001.2	43472	NAN	31825.6	66152.1	NAN	18276.5	33435.7	NAN	37567.6	42521.4	NAN	38388.9	40591.8	44144.4	3	3	3	17.8	22.174	1	P36969	Phospholipid hydroperoxide glutathione peroxidase	GPX4	Enzyme	sp|Q86YZ3|HORN_HUMAN;CON__Q86YZ3
32532.6	84625.2	35374	35743.7	34416.2	30552.4	52725	33691.6	44917.8	24653.4	23091.9	22367.2	54607.1	22657.5	45033.2	39580.4	58190.7	61863.5	41417.1	1	1	1	0.5	235.31	1	Q8NFU7	Methylcytosine dioxygenase TET1	TET1	Enzyme	sp|P00492|HPRT_HUMAN;sp|Q9NRG1|PRDC1_HUMAN
NAN	NAN	77984.5	NAN	NAN	27267.6	NAN	NAN	45529.1	NAN	NAN	24964.7	NAN	NAN	45271	NAN	NAN	17252.3	39711.5	2	2	2	4.2	45.987	1	Q8NFL0	UDP-GlcNAc:betaGal beta-1,3-N-acetylglucosaminyltransferase 7	B3GNT7	Enzyme	sp|Q9Y4L1|HYOU1_HUMAN
NAN	37463.6	NAN	NAN	29890.5	NAN	NAN	38790.1	NAN	NAN	14448.2	NAN	NAN	47862.2	NAN	NAN	45264.7	NAN	35619.9	1	1	1	5.7	34.596	2	Q96GK7	Fumarylacetoacetate hydrolase domain-containing protein 2A	FAHD2A	Enzyme	sp|Q9Y6R7|FCGBP_HUMAN
NAN	44712.8	34884.5	NAN	52717.7	20091.5	NAN	36350.8	19028.8	NAN	44836.9	18561.2	NAN	63686.5	23497.2	NAN	71924.7	15527.1	37151.7	2	2	2	4.3	41.949	1	O60547	GDP-mannose 4,6 dehydratase	GMDS	Enzyme	sp|P0DOX2|IGA2_HUMAN
19412.5	48624.6	NAN	17373.5	57119.7	NAN	24824.9	30972.5	NAN	10169.8	31127.5	NAN	41261.3	72666.4	NAN	29816	32916	NAN	36079.3	1	1	1	2.9	26.724	1	Q9BUT1	3-hydroxybutyrate dehydrogenase type 2	BDH2	Enzyme	sp|P0DOX3|IGD_HUMAN;sp|P01880|IGHD_HUMAN
NAN	21802.4	457274	NAN	13018.7	139955	NAN	7179.66	113560	NAN	3498.21	64768.3	NAN	7947.03	95063.2	NAN	6881.46	61794.9	82728.6	3	3	3	4.9	57.936	2	P14618	Pyruvate kinase PKM	PKM	Enzyme	sp|P0DOX5|IGG1_HUMAN;sp|P01857|IGHG1_HUMAN
55219.9	3249.72	253988	49354.7	5805.08	187873	42683.8	4060.1	209908	32568.7	2485.46	150865	70532.5	5873.48	146791	36723.1	3664.75	124467	78287.8	6	6	6	15.2	45.467	1	Q99519	Sialidase-1	NEU1	Enzyme	sp|P01876|IGHA1_HUMAN
25216.8	NAN	41652.1	44961.4	NAN	19645.3	36725.6	NAN	39266.2	29456.5	NAN	24696.2	31761.7	NAN	23412.6	38253.4	NAN	15763.5	31417.7	2	2	2	10	24.327	1	Q9UKK9	ADP-sugar pyrophosphatase	NUDT5	Enzyme	sp|P01877|IGHA2_HUMAN
39405.2	29401.5	27715.4	21548.5	46094.3	17859.4	40605.9	52451.6	23016.8	52539	34523.7	13344.9	32650.1	54891.7	11954	24159.5	64129.5	16124.9	33118.3	1	1	1	3.5	24.636	1	P22061	Protein-L-isoaspartate(D-aspartate) O-methyltransferase	PCMT1	Enzyme	sp|P01859|IGHG2_HUMAN
86992.3	24461.1	19936.2	71546.8	19562.5	17682.1	91456.6	21081.6	15343.1	69904.6	20390.4	12537.8	134878	30662.8	10004.1	94531	23002.5	15088.9	40710	3	3	3	16	36.573	1	P14550	Alcohol dehydrogenase [NADP(+)]	AKR1A1	Enzyme	sp|P01860|IGHG3_HUMAN
30381.4	NAN	NAN	28910.4	NAN	NAN	38293.2	NAN	NAN	21817.5	NAN	NAN	45950.7	NAN	NAN	17314.6	NAN	NAN	30457.3	2	2	2	5.1	35.117	1	Q9H0W9	Ester hydrolase C11orf5	C11orf54	Enzyme	sp|P01861|IGHG4_HUMAN
37868.2	NAN	52466.2	22992.9	NAN	18731.8	44023.9	NAN	33260	21990.6	NAN	17885.5	53124.9	NAN	24900.7	32690.9	NAN	17451.9	30865.4	2	2	2	5.6	39.731	1	P27169	Serum paraoxonase/arylesterase 1	PON1	Enzyme	sp|P01871|IGHM_HUMAN;sp|P0DOX6|IGM_HUMAN
22381.2	NAN	36845.5	26658.4	NAN	30514.3	35852.8	NAN	26284.1	20759.7	NAN	16663.5	48028.4	NAN	20415.8	19247.7	NAN	17252.3	27138.4	1	1	1	5.5	28.766	3	P15259	Phosphoglycerate mutase 2	PGAM2	Enzyme	sp|A0A0C4DH31|HV118_HUMAN
21325.6	NAN	51020.9	20748.2	NAN	21587.4	30560.9	NAN	34800	12619.8	NAN	22981.7	39547.5	NAN	26951.9	13749.6	NAN	13900	26224.4	1	1	1	2.5	46.604	1	P15907	Beta-galactoside alpha-2,6-sialyltransferase 1	ST6GAL1	Enzyme	sp|P23083|HV102_HUMAN
NAN	15384.6	104911	NAN	13562.2	106937	NAN	26923.9	29499.4	NAN	6326.1	8231.84	NAN	21967.8	65381.7	NAN	12536.1	13565.9	35435.6	2	2	2	16.2	22.588	1	P80188	Neutrophil gelatinase-associated lipocalin	LCN2	Enzyme	sp|A0A0C4DH29|HV103_HUMAN;sp|P0DP01|HV108_HUMAN;sp|A0A0B4J2H0|HV69D_HUMAN
NAN	20311.4	19797.1	NAN	20690.8	20377.6	NAN	22579.1	25848.6	NAN	14553.7	18629.5	NAN	18863.4	15162.3	NAN	25187.1	19463.7	20122	1	1	1	4.9	38.281	1	Q14376	UDP-glucose 4-epimerase	GALE	Enzyme	sp|A0A0A0MS14|HV145_HUMAN
17320.6	14567.8	34773.5	14780.4	13687.8	20431.4	17805.1	16092.5	31341.8	17461.6	10822.2	24243.3	17484.6	19093.6	18348.8	22532.2	25190.6	20706.6	19962.6	3	3	3	7.7	54.392	2	Q96HE7	ERO1-like protein alpha	ERO1A	Enzyme	sp|P01743|HV146_HUMAN
11506.8	16556.4	NAN	8612.4	12273.8	NAN	8490.3	12666.2	NAN	10781	9546.79	NAN	10109.3	15690.5	NAN	13122.9	17127.2	NAN	12270.6	1	1	1	6.2	27.679	1	P31944	Caspase-14	CASP14	Enzyme	sp|P01742|HV169_HUMAN
5649.47	NAN	25750.3	4928.05	NAN	27383.1	5202.9	NAN	20914.3	4666.74	NAN	18127.6	5602.29	NAN	19352.1	4617.83	NAN	14336.4	13716.5	2	2	2	13.8	23.356	1	P09211	Glutathione S-transferase P	GSTP1	Enzyme	sp|P01817|HV205_HUMAN
NAN	NAN	7361.58	NAN	NAN	5534.36	NAN	NAN	7728.11	NAN	NAN	5822	NAN	NAN	4608.88	NAN	NAN	5252.18	6051.18	1	1	1	2.3	98.828	1	O75891	Cytosolic 10-formyltetrahydrofolate dehydrogenase	ALDH1L1	Enzyme	sp|P01814|HV270_HUMAN
5482.43	NAN	NAN	4466.1	NAN	NAN	5344.72	NAN	NAN	5596.08	NAN	NAN	5647.9	NAN	NAN	5313.33	NAN	NAN	5273.63	1	1	1	1.5	57.206	1	P30837	Aldehyde dehydrogenase X, mitochondrial	ALDH1B1	Enzyme	sp|P01766|HV313_HUMAN
NAN	NAN	12319.9	NAN	NAN	2053.54	NAN	NAN	4553.94	NAN	NAN	1958.45	NAN	NAN	4282.09	NAN	NAN	1642.07	4468.33	1	1	1	2.6	29.676	1	P09237	Matrilysin	MMP7	Enzyme	sp|A0A0B4J1V0|HV315_HUMAN
5.15843e+06	3.60808e+06	5.38718e+06	3.86276e+06	4.3344e+06	5.26828e+06	3.98542e+06	3.75375e+06	4.80066e+06	2.46986e+06	1.78402e+06	3.40542e+06	6.67576e+06	5.35405e+06	4.80132e+06	2.46525e+06	3.50699e+06	2.48998e+06	3.99724e+06	28	28	28	57.1	58.112	1	P07602	Prosaposin	PSAP	Enzyme	sp|P01764|HV323_HUMAN
2.97688e+07	3.62832e+07	3.07482e+07	3.04028e+07	3.95041e+07	3.33319e+07	3.11775e+07	3.03312e+07	3.93838e+07	2.73095e+07	2.45803e+07	3.55095e+07	3.53131e+07	3.9721e+07	2.49615e+07	2.68888e+07	3.06546e+07	2.45888e+07	3.18053e+07	13	13	13	47.9	16.225	1	P00709	Alpha-lactalbumin	LALBA	Enzyme	sp|P0DP02|HVC33_HUMAN;sp|P01772|HV333_HUMAN
3.51209e+06	4.83003e+06	5.52637e+06	3.37674e+06	4.1134e+06	4.08527e+06	4.42425e+06	4.61085e+06	5.35628e+06	2.49966e+06	2.09933e+06	2.84875e+06	6.13104e+06	7.12866e+06	3.90638e+06	2.1618e+06	3.92837e+06	3.03992e+06	4.12159e+06	22	22	21	45.4	58.959	3	Q13410	Butyrophilin subfamily 1 member A1	BTN1A1	Immunity	sp|P0DP03|HV335_HUMAN;sp|P01768|HV330_HUMAN
5.2365e+07	6.5396e+07	9.00049e+07	4.04041e+07	6.30066e+07	4.97606e+07	5.6412e+07	5.70174e+07	8.11057e+07	3.19298e+07	3.31108e+07	4.74203e+07	8.44152e+07	8.62487e+07	6.37181e+07	3.27298e+07	4.99853e+07	4.09114e+07	5.72692e+07	66	66	62	86.1	78.181	1	P02788	Lactotransferrin	LTF	Immunity	sp|A0A0B4J1X8|HV343_HUMAN
1.65968e+07	1.62451e+07	2.92432e+07	1.40309e+07	1.61452e+07	1.56298e+07	1.71416e+07	1.47029e+07	2.43446e+07	1.19732e+07	9.49476e+06	1.54993e+07	2.23025e+07	2.10293e+07	1.69314e+07	1.09377e+07	1.57059e+07	1.34733e+07	1.67547e+07	39	39	39	61.1	83.283	1	P01833	Polymeric immunoglobulin receptor	PIGR	Immunity	sp|P0DP04|HV43D_HUMAN;sp|P01782|HV309_HUMAN
1.11011e+07	1.20189e+07	2.5722e+07	9.76914e+06	1.2069e+07	9.68151e+06	1.22808e+07	1.19243e+07	1.67238e+07	8.09893e+06	6.23172e+06	1.00759e+07	1.67064e+07	1.76052e+07	1.20397e+07	6.12637e+06	1.22103e+07	8.79956e+06	1.22402e+07	19	19	10	70.8	37.654	1	P01876	Immunoglobulin heavy constant alpha 1	IGHA1	Immunity	sp|A0A0A0MS15|HV349_HUMAN
6.7666e+06	6.95346e+06	1.57812e+07	5.46996e+06	6.16855e+06	6.20887e+06	7.40619e+06	7.23218e+06	1.05621e+07	4.93939e+06	3.39128e+06	6.83211e+06	8.95958e+06	8.10118e+06	7.27643e+06	3.55397e+06	6.80328e+06	6.2093e+06	7.16759e+06	7	7	3	53.7	23.379	2	P0DOX7	Immunoglobulin kappa light chain	IGK	Immunity	sp|P01780|HV307_HUMAN
4.1134e+06	6.41625e+06	2.27285e+07	2.90116e+06	7.19868e+06	5.96338e+06	5.45898e+06	7.72016e+06	1.21033e+07	2.04037e+06	3.15629e+06	5.42917e+06	9.46978e+06	1.25232e+07	1.01783e+07	2.31567e+06	6.9931e+06	4.85049e+06	7.49688e+06	75	75	75	52.7	187.15	3	P01024	Complement C3	C3	Immunity	sp|A0A0B4J1Y9|HV372_HUMAN
9.96059e+06	7.83445e+06	1.1078e+07	4.92264e+06	5.98119e+06	3.44053e+06	8.64539e+06	8.13889e+06	6.76989e+06	5.19143e+06	3.63292e+06	3.66175e+06	7.41492e+06	7.83553e+06	4.58154e+06	4.35699e+06	5.82691e+06	3.44292e+06	6.04447e+06	15	15	15	61.5	35.422	2	P10451	Osteopontin	SPP1	Immunity	sp|A0A0C4DH34|HV428_HUMAN
6.40071e+06	5.64914e+06	1.18493e+07	5.01563e+06	5.09094e+06	3.47264e+06	6.51891e+06	5.13844e+06	6.35649e+06	4.0162e+06	2.56726e+06	3.65009e+06	9.31291e+06	7.0062e+06	5.09482e+06	3.0252e+06	4.97236e+06	3.33233e+06	5.41582e+06	9	9	3	50.9	22.83	3	P0DOX8	Immunoglobulin lambda-1 light chain	IGL1	Immunity	sp|P01825|HV459_HUMAN;sp|P0DP08|HVD82_HUMAN;sp|P0DP06|HVD34_HUMAN;sp|A0A0C4DH41|HV461_HUMAN;sp|P06331|HV434_HUMAN;sp|P01824|HV439_HUMAN
6.13742e+06	5.10967e+06	4.8778e+06	5.28364e+06	5.53902e+06	4.55999e+06	5.48477e+06	4.2854e+06	5.10295e+06	4.81465e+06	3.80193e+06	4.62942e+06	6.54336e+06	6.28377e+06	3.55841e+06	4.12453e+06	5.23479e+06	3.79824e+06	4.88426e+06	16	16	16	55	34.258	1	P25311	Zinc-alpha-2-glycoprotein	AZGP1	Immunity	sp|A0A0J9YXX1|HV5X1_HUMAN
3.52258e+06	6.05628e+06	1.6115e+07	1.98568e+06	5.41189e+06	3.40542e+06	3.97742e+06	4.68105e+06	8.64479e+06	2.04391e+06	3.21703e+06	3.40518e+06	6.08236e+06	1.12998e+07	7.30575e+06	1.81118e+06	4.19401e+06	3.22507e+06	5.46246e+06	61	61	4	42.5	192.75	1	P0C0L5	Complement C4-B	C4B	Immunity	sp|A0A0C4DH38|HV551_HUMAN
4.35729e+06	4.09179e+06	6.93277e+06	2.48188e+06	2.76472e+06	2.8189e+06	5.88985e+06	5.55402e+06	6.29729e+06	3.12213e+06	2.08108e+06	2.89453e+06	4.83572e+06	4.31402e+06	3.57993e+06	3.2338e+06	3.81671e+06	3.69259e+06	4.02363e+06	21	21	21	53.9	45.205	2	P00738	Haptoglobin	HP	Immunity	sp|A0A0B4J1U7|HV601_HUMAN
4.55115e+06	5.25624e+06	8.17337e+06	3.19415e+06	4.84445e+06	2.85508e+06	3.7626e+06	4.34071e+06	5.02259e+06	2.55945e+06	1.93339e+06	3.39552e+06	4.62429e+06	4.61468e+06	3.53603e+06	1.74355e+06	3.58365e+06	2.47552e+06	3.87737e+06	19	12	3	62.9	48.462	7	P0DOX2	Immunoglobulin alpha-2 heavy chain	IGA2	Immunity	sp|P01591|IGJ_HUMAN
3.48783e+06	2.788e+06	5.45822e+06	2.46422e+06	3.61584e+06	2.89514e+06	3.86785e+06	2.53438e+06	3.45798e+06	2.61812e+06	1.71052e+06	3.24211e+06	5.11145e+06	4.64839e+06	3.87805e+06	1.92924e+06	4.12082e+06	3.61258e+06	3.40899e+06	13	13	6	41.4	48.986	2	P0DOX5	Immunoglobulin gamma-1 heavy chain	IGG1	Immunity	sp|P01834|IGKC_HUMAN
2.60798e+06	2.91124e+06	5.46201e+06	1.69505e+06	2.21565e+06	1.77735e+06	3.2484e+06	3.12993e+06	4.3191e+06	1.94064e+06	1.75751e+06	2.10706e+06	2.98025e+06	3.20013e+06	2.36155e+06	1.9235e+06	2.45876e+06	2.59895e+06	2.71101e+06	9	9	6	44.8	23.511	1	P02763	Alpha-1-acid glycoprotein 1	ORM1	Immunity	sp|P0DOX7|IGK_HUMAN
3.31597e+06	2.09207e+06	1.33552e+07	1.94819e+06	2.06799e+06	1.74368e+06	4.10258e+06	3.82625e+06	4.08414e+06	1.32936e+06	631972	1.77035e+06	5.47679e+06	5.08706e+06	3.91614e+06	1.11453e+06	1.33907e+06	1.62792e+06	3.26549e+06	17	17	17	34.7	52.494	1	P10909	Clusterin	CLU	Immunity	sp|P0DP09|KV113_HUMAN;sp|A0A0B4J2D9|KVD13_HUMAN
1.74694e+06	3.11759e+06	4.65387e+06	1.2449e+06	2.91669e+06	2.42222e+06	2.65264e+06	4.67424e+06	3.55249e+06	874622	1.65168e+06	1.99575e+06	3.16659e+06	4.42731e+06	3.03003e+06	1.22819e+06	2.73422e+06	2.03656e+06	2.72821e+06	26	26	26	33.1	85.532	2	P00751	Complement factor B	CFB	Immunity	sp|P04430|KV116_HUMAN
1.17416e+06	2.93047e+06	2.58351e+06	1.1829e+06	5.06173e+06	4.33199e+06	1.0953e+06	1.80117e+06	2.98314e+06	732414	2.24596e+06	3.38307e+06	1.58494e+06	4.33049e+06	3.14058e+06	1.48445e+06	5.34034e+06	2.86777e+06	2.76943e+06	8	8	8	61.5	16.537	1	P61626	Lysozyme C	LYZ	Immunity	sp|P01599|KV117_HUMAN
1.79307e+06	2.33404e+06	3.09048e+06	1.65489e+06	2.55324e+06	2.00074e+06	1.95184e+06	2.17487e+06	3.03549e+06	1.34866e+06	1.49074e+06	2.18076e+06	2.43519e+06	3.05852e+06	1.97867e+06	1.40117e+06	2.73821e+06	2.04108e+06	2.20403e+06	13	13	13	39.2	40.076	1	P08571	Monocyte differentiation antigen CD14	CD14	Immunity	sp|A0A075B6S5|KV127_HUMAN
2.11423e+06	1.61522e+06	2.55501e+06	1.46676e+06	1.93339e+06	1.41611e+06	2.5536e+06	2.18742e+06	2.33323e+06	2.65559e+06	1.62162e+06	1.99644e+06	2.01815e+06	2.09817e+06	1.201e+06	2.52596e+06	3.27758e+06	1.70637e+06	2.06833e+06	24	23	23	42.8	72.332	1	P11021	Endoplasmic reticulum chaperone BiP	HSPA5	Immunity	sp|P01594|KV133_HUMAN;sp|P01593|KVD33_HUMAN
2.41384e+06	2.8189e+06	7.24674e+06	1.2133e+06	2.29506e+06	1.39962e+06	2.14389e+06	2.36974e+06	3.54757e+06	851826	798759	1.53425e+06	3.71518e+06	3.9915e+06	3.25111e+06	645206	2.01172e+06	1.258e+06	2.4172e+06	18	18	18	48.6	49.439	2	P01871	Immunoglobulin heavy constant mu	IGHM	Immunity	sp|A0A0C4DH72|KV106_HUMAN
2.20722e+06	2.01815e+06	5.162e+06	1.97292e+06	2.08584e+06	1.64448e+06	2.25407e+06	1.69364e+06	2.71346e+06	1.42695e+06	1.00092e+06	1.94454e+06	3.41724e+06	2.71873e+06	1.91432e+06	1.22072e+06	1.98705e+06	1.34288e+06	2.14811e+06	7	3	2	88.7	11.265	2	P0DOY3	Immunoglobulin lambda constant 3	IGLC3	Immunity	sp|A0A0C4DH67|KV108_HUMAN;sp|A0A0C4DH69|KV109_HUMAN
1.49395e+06	2.31134e+06	2.80778e+06	1.14451e+06	2.06871e+06	1.80867e+06	1.68942e+06	2.02431e+06	3.32287e+06	1.30979e+06	1.57182e+06	1.86546e+06	2.21136e+06	2.75191e+06	2.23788e+06	1.21709e+06	2.10969e+06	1.70838e+06	2.00947e+06	33	33	33	27.3	163.29	3	P01023	Alpha-2-macroglobulin	A2M	Immunity	sp|A0A0C4DH68|KV224_HUMAN
1.82012e+06	1.87284e+06	2.97839e+06	1.52439e+06	1.77896e+06	973688	2.31567e+06	1.66617e+06	1.91551e+06	1.60718e+06	885173	1.23262e+06	2.42508e+06	2.3586e+06	1.24464e+06	1.3656e+06	1.66224e+06	974566	1.69302e+06	5	1	1	79.4	11.765	1	P01834	Immunoglobulin kappa constant	IGKC	Immunity	sp|A2NJV5|KV229_HUMAN;sp|A0A075B6S2|KVD29_HUMAN;sp|A0A0A0MRZ7|KVD26_HUMAN
1.49302e+06	1.34726e+06	3.60683e+06	1.35946e+06	1.36702e+06	1.45784e+06	1.65546e+06	1.1908e+06	2.43704e+06	1.00698e+06	715008	1.65053e+06	2.33485e+06	1.89006e+06	1.76814e+06	994423	1.22921e+06	1.25321e+06	1.60377e+06	7	7	7	63.5	18.098	1	P01591	Immunoglobulin J chain	JCHAIN	Immunity	sp|P04433|KV311_HUMAN;sp|A0A0A0MRZ8|KVD11_HUMAN
1.30897e+06	1.61265e+06	3.59236e+06	924491	1.33176e+06	1.44968e+06	1.71895e+06	1.74585e+06	2.77566e+06	925838	960216	1.38504e+06	1.82644e+06	1.94832e+06	1.7728e+06	730893	1.16953e+06	1.46452e+06	1.60794e+06	9	6	6	43.8	23.602	1	P19652	Alpha-1-acid glycoprotein 2	ORM2	Immunity	sp|P01624|KV315_HUMAN;sp|A0A0C4DH55|KVD07_HUMAN
1.64266e+06	2.13603e+06	2.11687e+06	1.24637e+06	1.72038e+06	1.01701e+06	1.79046e+06	1.82593e+06	1.74658e+06	1.04357e+06	925132	943720	2.50434e+06	2.81909e+06	1.31124e+06	994699	1.58308e+06	867137	1.56421e+06	15	15	15	31.6	65.75	2	P05156	Complement factor I	CFI	Immunity	sp|P01619|KV320_HUMAN
1.19411e+06	1.36456e+06	2.45025e+06	1.07291e+06	1.28354e+06	1.64186e+06	1.55815e+06	1.27353e+06	2.47827e+06	1.27671e+06	942152	1.61298e+06	1.54578e+06	1.59188e+06	1.17002e+06	1.04068e+06	1.43996e+06	1.64962e+06	1.4937e+06	6	6	6	4.8	122.1	1	P15941	Mucin-1	MUC1	Immunity	sp|A0A087WSY6|KVD15_HUMAN
1.20208e+06	1.77329e+06	2.84797e+06	713424	1.45612e+06	1.3969e+06	1.26088e+06	1.54299e+06	2.48119e+06	958022	1.2807e+06	1.616e+06	1.3167e+06	1.75897e+06	1.58681e+06	649964	1.63086e+06	1.81005e+06	1.53417e+06	9	4	4	37.1	35.9	1	P01859	Immunoglobulin heavy constant gamma 2	IGHG2	Immunity	sp|A0A0C4DH25|KVD20_HUMAN
2.47638e+06	1.98705e+06	6.34945e+06	587895	1.29462e+06	998290	1.26719e+06	2.21673e+06	2.34182e+06	574601	711843	1.29113e+06	2.12157e+06	3.09713e+06	2.45093e+06	619524	1.26289e+06	954774	1.7722e+06	15	15	15	46.2	42.625	1	P36222	Chitinase-3-like protein 1	CHI3L1	Immunity	sp|P06312|KV401_HUMAN
1.71336e+06	1.56085e+06	1.58549e+06	1.42883e+06	1.38802e+06	1.05433e+06	1.97087e+06	1.53085e+06	1.70696e+06	1.38236e+06	1.00712e+06	1.08352e+06	2.19167e+06	1.80567e+06	1.07641e+06	1.36389e+06	1.51606e+06	1.03078e+06	1.45198e+06	9	9	9	40.9	39.324	2	P02765	Alpha-2-HS-glycoprotein	AHSG	Immunity	sp|A0A0C4DH24|KV621_HUMAN
626867	2.03769e+06	3.73791e+06	522691	2.12025e+06	1.3178e+06	1.02387e+06	2.04703e+06	2.66019e+06	435164	735008	1.009e+06	2.60292e+06	5.29757e+06	2.82535e+06	307281	1.42764e+06	973620	1.82829e+06	16	16	16	47.3	43.122	1	Q08431	Lactadherin	MFGE8	Immunity	sp|A0A0A0MT36|KVD21_HUMAN
1.38947e+06	1.77317e+06	1.5207e+06	1.04047e+06	1.4003e+06	1.26114e+06	1.04249e+06	1.85091e+06	1.38102e+06	1.0972e+06	1.13921e+06	1.30272e+06	1.26491e+06	1.72074e+06	1.21422e+06	622192	1.86146e+06	1.00893e+06	1.32363e+06	4	4	4	41.2	13.714	1	P61769	Beta-2-microglobulin	B2M	Immunity	sp|P0DOY3|IGLC3_HUMAN;sp|P0DOY2|IGLC2_HUMAN
1.08879e+06	1.22521e+06	1.44596e+06	834180	1.06159e+06	711794	1.39207e+06	1.18816e+06	1.28728e+06	818487	790387	743875	1.3637e+06	1.41621e+06	844419	823894	1.06218e+06	866836	1.05154e+06	11	11	11	28.9	54.253	2	P04217	Alpha-1B-glycoprotein	A1BG	Immunity	sp|A0M8Q6|IGLC7_HUMAN
334559	1.07597e+06	2.00601e+06	265859	858406	784112	458894	1.12189e+06	1.42992e+06	243051	487621	684599	1.06469e+06	2.34166e+06	1.4003e+06	199275	913788	766699	947220	10	10	10	25.6	53.053	1	P16671	Platelet glycoprotein 4	CD36	Immunity	sp|P01703|LV140_HUMAN
570632	471599	1.71479e+06	591697	476494	844419	883640	627911	1.58472e+06	670232	309891	949758	1.14198e+06	1.1153e+06	922059	549439	482845	860908	835158	14	14	14	9	231.52	1	Q99102	Mucin-4	MUC4	Immunity	sp|P01700|LV147_HUMAN;sp|P01699|LV144_HUMAN
829510	1.10691e+06	827271	534118	1.01969e+06	455124	753632	1.00558e+06	637603	696662	778372	544397	922699	1.1492e+06	510163	568539	1.17857e+06	605892	782025	10	6	4	41.6	35.94	1	P01861	Immunoglobulin heavy constant gamma 4	IGHG4	Immunity	sp|P01706|LV211_HUMAN
964018	647625	1.42438e+06	763464	619223	318426	979713	530245	602458	532307	299480	402855	1.55728e+06	946472	436040	438191	525671	291614	665614	3	1	0	28.2	12.947	2	P0DP03	Immunoglobulin heavy variable 3-35	IGHV3-35	Immunity	sp|P01704|LV214_HUMAN
308968	1.11909e+06	943393	274586	1.12298e+06	355453	299480	860849	617937	173912	643999	400349	543605	1.51134e+06	517034	181788	1.14713e+06	307260	648247	3	2	2	23.1	12.943	1	P01780	Immunoglobulin heavy variable 3-7	IGHV3-7	Immunity	sp|A0A075B6J9|LV218_HUMAN
551844	639152	816221	460008	713177	323185	535156	502234	505447	325252	312392	354248	850705	915754	454777	354936	791703	256785	535949	4	4	1	34.8	12.441	1	A0A075B6K4	Immunoglobulin lambda variable 3-10	IGLV3-10	Immunity	sp|P01705|LV223_HUMAN
762988	291614	946866	679023	317347	489280	1.10629e+06	374291	840274	524143	135798	406191	1.38822e+06	609303	606144	399407	223080	338477	569161	3	3	3	23.4	14.177	1	P13987	CD59 glycoprotein	CD59	Immunity	sp|P01709|LV208_HUMAN
NAN	754102	758032	NAN	508328	314347	NAN	464301	540862	NAN	317589	294784	NAN	730437	364864	NAN	540862	374161	496889	5	5	5	31	16.06	1	P39019	40S ribosomal protein S19	RPS19	Immunity	sp|A0A075B6K4|LV310_HUMAN
687881	391269	720081	557959	290887	318228	798371	358149	661554	598503	203251	372789	802254	341446	397033	540637	304694	432548	475862	8	8	8	18	70.036	2	P00734	Prothrombin	F2	Immunity	sp|A0A075B6K2|LV312_HUMAN
805151	524397	364283	665371	536716	312436	747130	439590	314631	439377	234300	197638	1.03078e+06	708938	303934	484756	419671	171506	464438	13	13	13	24.6	63.544	1	P28799	Granulins	GRN	Immunity	sp|P01714|LV319_HUMAN
376685	522836	923466	394892	581049	465913	363224	503768	599625	326925	221754	260243	479776	650144	459212	157632	529584	257088	452772	6	3	2	65.1	11.253	1	A0M8Q6	Immunoglobulin lambda constant 7	IGLC7	Immunity	sp|P80748|LV321_HUMAN
359716	442740	1.09667e+06	294662	451010	334536	372867	392056	615842	253478	225083	374862	559625	660913	483850	156413	407122	405572	442782	3	3	2	35.3	12.557	1	P01619	Immunoglobulin kappa variable 3-20	IGKV3-20	Immunity	sp|P01717|LV325_HUMAN
436221	435466	631402	502756	373177	290202	525343	431021	444955	346405	249192	334466	576915	491387	336699	348186	379384	268563	409737	7	7	7	13.1	53.498	1	Q9NZP8	Complement C1r subcomponent-like protein	C1RL	Immunity	sp|A0A075B6K5|LV39_HUMAN
515424	244470	1.46027e+06	380517	261418	375746	603921	183167	774282	290343	146811	472482	965221	369087	481108	264774	227215	394072	464406	4	4	4	29.8	13.38	1	P06312	Immunoglobulin kappa variable 4-1	IGKV4-1	Immunity	sp|A0A075B6H9|LV469_HUMAN
251274	436766	856979	185557	385294	302547	388081	480774	572573	153417	139926	218853	1.46087e+06	1.0613e+06	610783	124070	314130	239356	466546	4	4	4	13.6	25.416	1	P21926	CD9 antigen	CD9	Immunity	sp|P01721|LV657_HUMAN
364687	506394	636235	328060	561140	256074	381467	470652	385775	276324	257016	236307	523997	653397	254517	210054	506921	215496	391754	2	2	1	21.6	12.936	6	P01825	Immunoglobulin heavy variable 4-59	IGHV4-59	Immunity	sp|P04211|LV743_HUMAN
270712	543040	780317	226068	476428	312457	372970	582541	484555	170676	228320	362243	369087	601581	383031	152600	366690	285514	394007	3	3	1	23.1	12.778	1	P01599	Immunoglobulin kappa variable 1-17	IGKV1-17	Immunity	sp|A0A075B6I0|LV861_HUMAN
336209	358323	699663	291816	308070	246717	404590	281368	489789	327038	228479	334142	466010	394427	334443	259702	361240	285019	357108	2	2	2	34.2	12.848	2	P01594	Immunoglobulin kappa variable 1-33	IGKV1-33	Immunity	sp|A0A0B4J1Y8|LV949_HUMAN
380569	356539	987759	251361	260442	289539	372634	218171	614435	230803	151232	344012	488670	401600	413549	208936	259199	306282	362068	3	3	1	25.8	13.085	7	A2NJV5	Immunoglobulin kappa variable 2-29	IGKV2-29	Immunity	sp|P0DOX8|IGL1_HUMAN;sp|B9A064|IGLL5_HUMAN;sp|P0CG04|IGLC1_HUMAN
300416	441545	788417	226476	466494	183625	317171	341305	324060	205988	251901	200939	480674	681286	273864	202828	443139	197186	354523	4	4	2	48.7	12.446	1	P80748	Immunoglobulin lambda variable 3-21	IGLV3-21	Immunity	sp|P15814|IGLL1_HUMAN
128019	543229	644714	115377	543681	315417	166435	461509	361040	106220	318073	255117	246307	1.01863e+06	483615	124277	479576	223265	376852	9	9	9	36.1	28.723	1	Q06323	Proteasome activator complex subunit 1	PSME1	Immunity	sp|O14498|ISLR_HUMAN
358720	345781	792417	252513	333286	228590	380569	279038	367275	245064	162547	220146	522329	475834	349831	178282	299210	204551	331604	4	4	2	47	12.674	1	A0A0C4DH38	Immunoglobulin heavy variable 5-51	IGHV5-51	Immunity	sp|Q969P0|IGSF8_HUMAN
NAN	NAN	1.09159e+06	NAN	NAN	139364	NAN	NAN	367937	NAN	NAN	224491	NAN	NAN	325185	NAN	NAN	189705	389712	6	6	6	10.2	80.118	1	P00736	Complement C1r subcomponent	C1R	Immunity	sp|Q15181|IPYR_HUMAN
164075	305434	794617	103732	359492	578116	176903	289499	704871	102531	188290	575837	228336	381150	554374	77343.9	337166	419497	363364	12	12	12	16.3	93.517	2	P10643	Complement component C7	C7	Immunity	sp|Q9NX62|IMPA3_HUMAN
260947	385989	675221	183294	352460	150719	356761	325027	397281	214616	275215	244030	423177	457686	261654	146618	313108	198530	315376	3	1	1	23.9	12.697	5	A0A0C4DH72	Immunoglobulin kappa variable 1-6	IGKV1-6	Immunity	sp|P18065|IBP2_HUMAN
216874	389618	662426	170156	391187	257266	341612	283797	407884	134430	169110	326223	318404	515710	303934	134608	368754	235293	318260	3	2	0	28.2	12.989	2	P0DP02	Immunoglobulin heavy variable 3-30-3	IGHV3-30-3	Immunity	sp|P19823|ITIH2_HUMAN
374628	399601	389294	343893	383828	129842	434501	392464	260099	291432	259720	145565	484521	487790	161167	246205	456894	105472	316017	1	1	1	7.7	13.124	1	A0A0C4DH34	Immunoglobulin heavy variable 4-28	IGHV4-28	Immunity	sp|Q14624|ITIH4_HUMAN
220956	301584	1.20608e+06	133706	240921	304694	231684	263437	648254	125959	150855	408818	296917	388135	484655	96376.9	245693	399296	348651	3	2	2	27	12.575	2	P04433	Immunoglobulin kappa variable 3-11	IGKV3-11	Immunity	sp|P05362|ICAM1_HUMAN
73736.9	471991	1.06824e+06	66423.2	426327	1.12493e+06	90241.3	626954	544548	35718.9	209836	339888	103588	529070	647805	57517	401517	465364	424115	4	4	4	43	13.242	1	P06702	Protein S100-A9	S100A9	Immunity	sp|O95998|I18BP_HUMAN
240537	225974	753109	200884	207896	518649	205119	162086	697290	120879	142223	520414	306962	249884	557263	137322	165871	451761	330799	3	3	3	37.4	11.389	3	P19875	C-X-C motif chemokine 2	CXCL2	Immunity	sp|O75874|IDHC_HUMAN
323207	265417	637559	267578	202421	296506	341257	206503	483951	189653	121517	277880	459403	301793	341660	165997	223358	264242	296864	3	3	2	26.5	12.659	1	P01742	Immunoglobulin heavy variable 1-69	IGHV1-69	Immunity	sp|Q92876|KLK6_HUMAN
322894	NAN	NAN	221631	NAN	NAN	372040	NAN	NAN	252531	NAN	NAN	348114	NAN	NAN	197748	NAN	NAN	278413	4	4	4	7.9	63.173	1	P02748	Complement C9	C9	Immunity	sp|O60259|KLK8_HUMAN
341446	639906	252986	252636	568263	72888.3	374343	547197	167977	253285	264352	99754.9	448298	834470	102311	221616	548184	78011.5	336852	2	2	2	25.4	13.017	2	P0DP04	Immunoglobulin heavy variable 3-43D	IGHV3-43D	Immunity	sp|P07498|CASK_HUMAN
438525	150062	666756	410238	196205	242042	457718	133160	369855	255684	85729.3	269850	682893	241992	353635	241121	140023	197296	299662	2	2	1	23.9	12.82	1	A0A0C4DH31	Immunoglobulin heavy variable 1-18	IGHV1-18	Immunity	sp|Q2KJY2|KI26B_HUMAN
NAN	293337	428995	NAN	302316	176695	NAN	376711	375694	NAN	123864	116818	NAN	576835	187795	NAN	268935	136024	280335	2	2	2	7.6	25.636	1	P08962	CD63 antigen	CD63	Immunity	sp|P01042|KNG1_HUMAN
578156	280764	892319	295767	206646	199413	406332	181436	526181	216784	74662.7	340855	467757	157228	336862	111223	113403	243338	297116	18	1	1	74.1	36.591	1	P01877	Immunoglobulin heavy constant alpha 2	IGHA2	Immunity	sp|O43278|SPIT1_HUMAN
363930	397942	467077	307878	350438	90404.1	457243	350195	176523	207449	175231	105377	521280	482343	119678	169615	329427	91355.2	282321	3	3	1	27	12.534	1	A0A087WSY6	Immunoglobulin kappa variable 3D-15	IGKV3D-15	Immunity	sp|Q08431|MFGM_HUMAN
203096	309547	446252	144299	268284	279115	182761	255418	373980	116309	146709	256785	278767	337938	283345	157141	209429	221017	251006	3	3	3	13.2	27.433	1	O75888	Tumor necrosis factor ligand superfamily member 13	TNFSF13	Immunity	sp|P22079|PERL_HUMAN
284921	275063	314347	255985	267801	102780	465590	418945	169110	224134	152262	110862	421274	333632	103001	286366	338102	100972	255307	4	4	4	15.6	26.152	1	P17931	Galectin-3	LGALS3	Immunity	sp|P02788|TRFL_HUMAN
161805	189837	528374	143979	179050	232714	231299	214274	376268	119000	115321	221431	476329	264572	300311	123350	199884	183625	241154	6	6	6	14.1	56.224	2	P0DOX3	Immunoglobulin delta heavy chain	IGD	Immunity	sp|Q04760|LGUL_HUMAN
200884	199620	277014	153907	125489	219780	154153	216995	399822	196736	104519	234463	236585	238694	174855	421420	231427	171494	220998	5	5	5	39.1	11.284	1	P81605	Dermcidin	DCD	Immunity	sp|Q14766|LTBP1_HUMAN
238512	148047	850705	239688	156804	235718	286684	125663	361165	170700	70944.3	267133	522728	216514	241138	112932	88740.2	174904	251189	1	1	1	11	12.412	1	A0A075B6J9	Immunoglobulin lambda variable 2-18	IGLV2-18	Immunity	sp|Q99538|LGMN_HUMAN
155128	327878	487080	117223	347632	190311	145888	285415	334165	71869.9	159832	187184	172472	402715	203448	62117	308263	149294	232517	3	3	2	26.1	13.203	1	A0A0B4J1Y9	Immunoglobulin heavy variable 3-72	IGHV3-72	Immunity	sp|P02750|A2GL_HUMAN
204778	203787	487621	179422	173383	230755	226241	141928	302358	142638	88176.1	290122	297123	236077	200230	109010	159290	191489	215274	3	3	3	24.8	12.283	2	P01700	Immunoglobulin lambda variable 1-47	IGLV1-47	Immunity	sp|P30740|ILEU_HUMAN
118843	280298	533305	125098	253021	276285	110172	191622	379989	79221.3	102559	226618	193276	268935	267801	90799.7	210229	194121	222550	2	2	1	20.2	13.056	1	A0A0A0MS15	Immunoglobulin heavy variable 3-49	IGHV3-49	Immunity	sp|P09960|LKHA4_HUMAN
154131	212573	348549	116607	202197	233490	142214	157076	248106	97215.6	107808	244216	248968	231059	287042	88820.2	234495	236864	202194	10	3	3	37.4	41.287	1	P01860	Immunoglobulin heavy constant gamma 3	IGHG3	Immunity	sp|Q14847|LASP1_HUMAN
166654	182306	423940	128892	298258	98333.8	239472	213978	264462	104823	137741	144149	276630	307985	131582	106228	169979	98634.2	195729	2	2	2	14.8	12.814	1	A0A075B6I0	Immunoglobulin lambda variable 8-61	IGLV8-61	Immunity	sp|P31025|LCN1_HUMAN
190166	203942	417843	113931	111633	86445.3	268414	227657	241975	110792	77908.9	132084	272123	255453	129106	118440	136354	116664	177692	5	5	5	10.9	57.825	1	P05362	Intercellular adhesion molecule 1	ICAM1	Immunity	sp|Q86X29|LSR_HUMAN
205375	332686	260857	143143	243641	76273.8	187405	204027	141124	108362	121088	94767.2	271483	326925	117069	98812.1	240054	67112.8	178519	3	3	1	21.4	12.451	1	P04211	Immunoglobulin lambda variable 7-43	IGLV7-43	Immunity	sp|P06858|LIPL_HUMAN
NAN	NAN	297411	NAN	NAN	100958	NAN	NAN	215645	NAN	NAN	128919	NAN	NAN	118613	NAN	NAN	105743	161215	1	1	1	13.7	12.618	1	P04430	Immunoglobulin kappa variable 1-16	IGKV1-16	Immunity	sp|P00338|LDHA_HUMAN
73762.5	208343	346910	76751.1	127559	129770	125637	229447	288258	66326.6	80382.8	146486	196014	295316	245642	42014.5	113947	102659	165968	2	2	1	6	30.139	11	Q9GIY3	HLA class II histocompatibility antigen, DRB1-14 beta chain	HLA-DRB1	Immunity	sp|P07195|LDHB_HUMAN
299252	82043.4	165045	243388	78728.6	107599	288618	81844.6	116680	249089	65024.7	115690	406163	122388	105340	308113	132442	129250	164556	3	3	3	18	17.068	1	Q9BQI0	Allograft inflammatory factor 1-like	AIF1L	Immunity	sp|Q14696|MESD_HUMAN
211119	132644	146364	156435	143302	80818.6	280473	135591	93229.6	237868	99292.7	78087.3	256038	223606	71003.4	207234	200494	77488.8	154116	2	2	2	17.4	12.476	1	P14174	Macrophage migration inhibitory factor	MIF	Immunity	sp|P51884|LUM_HUMAN
135713	NAN	NAN	122100	NAN	NAN	169110	NAN	NAN	83570.1	NAN	NAN	279270	NAN	NAN	108859	NAN	NAN	152582	1	1	1	3	33.515	1	P04233	HLA class II histocompatibility antigen gamma chain	HG2A	Immunity	sp|Q7Z4W1|DCXR_HUMAN
49991.7	282365	319864	31307.1	232989	86289.7	79226.7	371628	229288	61752.1	98729.9	73721.6	142243	702189	227168	43285.6	186201	86445.3	191452	3	3	3	18.2	25.809	1	P60033	CD81 antigen	CD81	Immunity	sp|O95274|LYPD3_HUMAN
170794	169157	174069	142302	167604	93930.1	214364	154902	153992	119711	94688.4	108670	224180	200800	100958	134570	144249	73207.3	145374	8	8	8	5.2	158.54	1	O75882	Attractin	ATRN	Immunity	sp|Q9Y6Y9|LY96_HUMAN
175657	110379	226084	165607	121189	87512.4	268414	85979.2	197323	114160	74631.7	89692.5	354518	167233	137913	140557	130727	90749.4	150745	4	2	2	40	12.332	1	A0A075B6K5	Immunoglobulin lambda variable 3-9	IGLV3-9	Immunity	sp|P10253|LYAG_HUMAN
NAN	133567	256696	NAN	140567	136676	NAN	146841	194472	NAN	61649.4	122507	NAN	238198	128499	NAN	110962	86763.5	146450	2	1	1	13.4	12.644	1	P01706	Immunoglobulin lambda variable 2-11	IGLV2-11	Immunity	sp|O00754|MA2B1_HUMAN
152600	146943	283718	126423	141476	71432.8	181902	145232	161805	112596	90278.8	88206.7	189482	197734	103753	114652	139955	81816.3	139847	3	3	3	9.1	45.997	1	O14498	Immunoglobulin superfamily containing leucine-rich repeat protein	ISLR	Immunity	sp|P10619|PPGB_HUMAN
225286	113631	293235	189626	101204	100087	200564	85355.7	177247	130800	49122.6	117557	277014	124458	128499	161660	103037	83506.4	143330	2	2	2	17	12.042	1	P01714	Immunoglobulin lambda variable 3-19	IGLV3-19	Immunity	sp|P11279|LAMP1_HUMAN
90976.1	183319	291715	89128.5	190919	130691	81037.4	111393	188826	56438.8	79700.4	119902	148757	207076	178467	62423.4	174286	115241	141725	2	1	1	16.8	12.926	1	A0A0B4J1V0	Immunoglobulin heavy variable 3-15	IGHV3-15	Immunity	sp|P13473|LAMP2_HUMAN
89729.8	137579	220726	80863.4	152685	187652	106331	107427	236257	71984.6	74781.8	147883	140499	184288	190113	57925.1	153077	103223	138429	1	1	1	17.1	12.566	1	P01721	Immunoglobulin lambda variable 6-57	IGLV6-57	Immunity	sp|P61626|LYSC_HUMAN
287519	123137	84636.9	255967	127241	78266.1	268098	102730	106242	236766	81867.3	68404.3	364056	133160	61117.6	218398	141075	69682.1	148285	4	4	4	7.5	65.033	1	Q969P0	Immunoglobulin superfamily member 8	IGSF8	Immunity	sp|P09603|CSF1_HUMAN
133446	176426	292931	77354.6	138959	72762.1	157785	146750	179846	93171.4	101337	102290	169227	218141	132460	46640.6	124778	98034.4	136994	3	3	2	29.1	12.711	1	A0A075B6S5	Immunoglobulin kappa variable 1-27	IGKV1-27	Immunity	sp|P22897|MRC1_HUMAN
90172.5	NAN	291513	79171.9	NAN	163247	106338	NAN	239025	49255.6	NAN	135939	185982	NAN	154227	50510.7	NAN	102353	141597	2	2	2	2.8	71.607	1	P43121	Cell surface glycoprotein MUC18	MCAM	Immunity	sp|P14174|MIF_HUMAN
94380.4	181776	206617	84883.7	116624	88912.6	109472	117459	162739	73486.9	92399.7	95937	143690	173395	100060	59105.3	150594	90266.3	120436	2	2	1	12.6	13.26	1	P01814	Immunoglobulin heavy variable 2-70	IGHV2-70	Immunity	sp|P40121|CAPG_HUMAN
100951	241556	312392	99678.9	165469	44647.8	103087	113364	107442	88974.2	91133.9	50507.1	168981	224522	91710.5	80891.5	155807	61979.3	129538	3	1	1	26.5	12.772	1	A0A0J9YXX1	Immunoglobulin heavy variable 5-10-1	IGHV5-10-1	Immunity	sp|P04156|PRIO_HUMAN
51511.3	NAN	401823	40339.3	NAN	134822	65626.9	NAN	328515	54376.7	NAN	188761	61790.6	NAN	230004	29880.2	NAN	154356	153663	2	2	2	0.7	572.01	1	Q9Y6R7	IgGFc-binding protein	FCGBP	Immunity	sp|P40925|MDHC_HUMAN
190496	86709.4	NAN	148582	87706.7	NAN	189903	85125.3	NAN	184889	45731.5	NAN	150125	106730	NAN	153215	72159.4	NAN	119170	2	2	2	26.5	12.569	2	P0DP09	Immunoglobulin kappa variable 1-13	IGKV1-13	Immunity	sp|P33908|MA1A1_HUMAN
53172.8	141417	325230	49905.1	122278	89450.4	98757.3	131901	230116	48915.4	80004.9	139926	90466.7	177998	147484	43435.9	105158	99285.8	124808	3	2	2	19.7	22.963	1	P15814	Immunoglobulin lambda-like polypeptide 1	IGLL1	Immunity	sp|P49006|MRP_HUMAN
106552	NAN	NAN	94132.2	NAN	NAN	130800	NAN	NAN	99796.4	NAN	NAN	134077	NAN	NAN	79755.7	NAN	NAN	107712	1	1	1	3.3	33.348	1	O75144	ICOS ligand	ICOSL	Immunity	sp|O15232|MATN3_HUMAN
83489.1	NAN	NAN	62901.2	NAN	NAN	157883	NAN	NAN	119736	NAN	NAN	82294	NAN	NAN	122413	NAN	NAN	109046	2	1	1	28.2	12.582	1	P01764	Immunoglobulin heavy variable 3-23	IGHV3-23	Immunity	sp|P09237|MMP7_HUMAN
55750.6	127241	314369	41522.3	120879	149139	44302.5	108927	222031	34483.1	68737	148984	80964.4	159600	189876	24802.5	111989	104309	120715	2	1	1	13.6	12.382	1	P01709	Immunoglobulin lambda variable 2-8	IGLV2-8	Immunity	sp|P55145|MANF_HUMAN
NAN	99265.2	137027	NAN	115650	329838	NAN	280784	80572.5	NAN	25689.7	46776.6	NAN	109040	80835.4	NAN	64125	80544.6	120846	2	2	2	16.3	10.575	1	P80511	Protein S100-A12	S100A12	Immunity	sp|P01033|TIMP1_HUMAN
NAN	227184	111031	NAN	107264	55327.2	NAN	143829	102830	NAN	60113.4	33909.5	NAN	208097	88023.4	NAN	109700	44231.9	107628	2	2	2	9.7	29.625	1	P27701	CD82 antigen	CD82	Immunity	sp|Q13228|SBP1_HUMAN
95466	111509	NAN	59996.9	93074.6	NAN	128161	97478.7	NAN	80902.7	60326.3	NAN	124830	129071	NAN	76703.2	86499.2	NAN	95322.9	59	2	2	41.1	192.78	2	P0C0L4	Complement C4-A	C4A	Immunity	sp|Q8NFU7|TET1_HUMAN
NAN	NAN	173912	NAN	NAN	75244.6	NAN	NAN	124380	NAN	NAN	65449.7	NAN	NAN	80355	NAN	NAN	70142.4	98247.4	1	1	1	9.4	13.508	1	A0A0A0MS14	Immunoglobulin heavy variable 1-45	IGHV1-45	Immunity	sp|Q9H8H3|MET7A_HUMAN
NAN	121072	118219	NAN	115369	72636.1	NAN	118309	95585.2	NAN	61321.3	61615.3	NAN	153162	74270.4	NAN	110012	50830.3	96033.4	2	2	2	3.8	59.582	1	Q6UX71	Plexin domain-containing protein 2	PLXDC2	Immunity	sp|P21741|MK_HUMAN
109131	120310	310063	66852.8	91020.3	82259.8	82786	70483.6	131810	54637.4	35713.9	94905.2	106722	94832.9	92688.3	53242.8	120302	90416.6	99943.9	2	1	1	16.7	13.079	1	A0A0C4DH68	Immunoglobulin kappa variable 2-24	IGKV2-24	Immunity	sp|P26038|MOES_HUMAN
NAN	NAN	158574	NAN	NAN	65196.2	NAN	NAN	113828	NAN	NAN	71166	NAN	NAN	80188.1	NAN	NAN	68323.8	92879.4	2	1	1	21.6	12.515	1	A0A0C4DH25	Immunoglobulin kappa variable 3D-20	IGKV3D-20	Immunity	sp|P08571|CD14_HUMAN
68846.7	116228	207363	66460.1	102837	88218.9	57294.1	63876.6	115321	46653.6	70964	83529.6	91958.8	106220	102987	46818.8	129071	62627.1	91672.3	2	2	2	16.3	13.024	1	A0A0B4J1Y8	Immunoglobulin lambda variable 9-49	IGLV9-49	Immunity	sp|P15941|MUC1_HUMAN
NAN	NAN	149833	NAN	NAN	50234.8	NAN	NAN	96236.7	NAN	NAN	64651.7	NAN	NAN	68413.8	NAN	NAN	112760	90355.1	1	1	1	10.5	12.43	1	A0A0C4DH24	Immunoglobulin kappa variable 6-21	IGKV6-21	Immunity	sp|Q8N307|MUC20_HUMAN
121973	59380.4	277976	71517.1	56380.2	71289.4	141319	97776.5	124088	59294.1	23818.6	70556.9	149263	108309	103753	88102.8	63369.5	61457.4	95744.2	2	2	2	5.3	30.878	1	Q7Z7D3	V-set domain-containing T-cell activation inhibitor 1	VTCN1	Immunity	sp|Q99102|MUC4_HUMAN
74921.9	NAN	138239	117826	NAN	113820	136989	NAN	59619.6	53206	NAN	39364.3	112503	NAN	52495.3	81352.6	NAN	55093.7	87318.9	2	1	1	7.9	26.697	1	Q96C19	EF-hand domain-containing protein D2	EFHD2	Immunity	sp|Q9HC84|MUC5B_HUMAN
77017.6	NAN	NAN	62975.4	NAN	NAN	104367	NAN	NAN	77601.7	NAN	NAN	94511.4	NAN	NAN	61487.3	NAN	NAN	80188.4	1	1	1	1.9	65.102	1	Q13740	CD166 antigen	ALCAM	Immunity	sp|Q8NI22|MCFD2_HUMAN
NAN	93611.6	132350	NAN	79089.6	49649.8	NAN	104323	93845.5	NAN	49611.9	46618	NAN	141231	58970.3	NAN	98442.9	53202.3	83412.2	3	3	3	24	21.225	1	P02794	Ferritin heavy chain	FTH1	Immunity	sp|P20138|CD33_HUMAN
76284.4	NAN	NAN	58550.7	NAN	NAN	108558	NAN	NAN	49957	NAN	NAN	128081	NAN	NAN	64254.1	NAN	NAN	81880.1	1	1	1	2.1	41.4	1	P08174	Complement decay-accelerating factor	CD55	Immunity	sp|Q969H8|MYDGF_HUMAN
NAN	70395.7	NAN	NAN	70900.1	NAN	NAN	78581.4	NAN	NAN	46479.3	NAN	NAN	98007.2	NAN	NAN	102566	NAN	77821.7	1	1	1	3.3	39.825	1	P20138	Myeloid cell surface antigen CD33	CD33	Immunity	sp|P52179|MYOM1_HUMAN
NAN	214527	33764	NAN	186498	27558.3	NAN	213193	35659.5	NAN	100477	27700	NAN	311722	26017.6	NAN	220987	22989.7	118424	3	3	3	15.2	23.354	1	O00161	Synaptosomal-associated protein 23	SNAP23	Immunity	sp|P58546|MTPN_HUMAN
129017	73471.6	61542.7	124544	70381.1	43123.9	133984	64714.4	87864.9	117199	57433.3	38677.3	158695	109131	36338.2	88506.8	74927.1	35185.7	80924.7	1	1	1	10.5	12.34	1	A0A0A0MT36	Immunoglobulin kappa variable 6D-21	IGKV6D-21	Immunity	sp|P29966|MARCS_HUMAN
71675.9	79199.3	100839	67743.7	78228.1	62440.7	64325.4	66363.4	122566	58190.7	39438	54523.9	132286	123128	121576	41158.4	64093.9	43073.1	77598.5	2	1	1	6	29.878	6	Q95IE3	HLA class II histocompatibility antigen, DRB1-12 beta chain	HLA-DRB1	Immunity	sp|P20933|ASPG_HUMAN
NAN	70239.7	123043	NAN	72485.3	62931.7	NAN	67974.2	89246	NAN	42341.9	58279.5	NAN	88310.7	73035	NAN	75057.1	58660.4	73467	3	3	3	6	42.054	1	Q9UGM5	Fetuin-B	FETUB	Immunity	sp|O94760|DDAH1_HUMAN
NAN	109852	73998.1	NAN	88592.7	47772.7	NAN	108542	63721.8	NAN	59714.8	55392.4	NAN	124830	41398.8	NAN	99004.1	37842	75888.4	2	2	2	4.1	65.163	1	P07357	Complement component C8 alpha chain	C8A	Immunity	sp|O14745|NHRF1_HUMAN
325749	NAN	39585.9	315329	NAN	20311.4	289439	NAN	29093.3	184058	NAN	18079.9	487519	NAN	23757.6	149294	NAN	16955.9	143039	1	1	1	9.3	13.077	1	A0A0B4J1X8	Immunoglobulin heavy variable 3-43	IGHV3-43	Immunity	sp|P34059|GALNS_HUMAN
NAN	69542.1	149533	NAN	58198.7	53579.7	NAN	82987.1	94047.4	NAN	29803.6	41075.8	NAN	92926.3	82488.2	NAN	64045.1	53143.3	72614.2	1	1	1	5.6	19.769	1	Q10589	Bone marrow stromal antigen 2	BST2	Immunity	sp|P15586|GNS_HUMAN
58713.3	50266.2	110310	50883.1	86020.9	64089.5	59117.6	52746.9	108249	40364.5	48939.1	99272.1	71269.6	49846.3	83599.1	55831.8	54815.6	105333	70056.2	2	2	2	3.5	59.482	1	O43405	Cochlin	COCH	Immunity	sp|Q96PD5|PGRP2_HUMAN
35234.5	64669.6	256251	30946.7	40840.1	101583	46598.6	61380.8	203815	30063	26051.9	94426.2	70679.3	86811.6	158245	23994.2	42412.4	73369.9	83067	2	2	2	11.4	28.607	2	P01903	HLA class II histocompatibility antigen, DR alpha chain	HLA-DRA	Immunity	sp|Q8NCW5|NNRE_HUMAN
75673.5	50584.2	210374	62997.2	51429.2	88974.2	60944.1	34787.9	138401	44437.8	20563.5	94080	109502	52564.5	110233	29503.5	45148.8	81420.2	75643.9	2	1	1	22.2	12.933	1	P01743	Immunoglobulin heavy variable 1-46	IGHV1-46	Immunity	sp|Q68D85|NR3L1_HUMAN
NAN	82791.8	113891	NAN	49787.6	41204.1	NAN	70929.6	80494.4	NAN	45337	49725.6	NAN	88826.3	41107.1	NAN	76655.4	50186.1	65911.4	1	1	1	7.4	13.481	1	A0A0B4J1U7	Immunoglobulin heavy variable 6-1	IGHV6-1	Immunity	sp|Q96NY8|NECT4_HUMAN
34903.9	67439.2	169814	40820.3	55797	79568	39206.4	59302.3	114628	22331.6	22811.9	102261	45906.2	73375	150604	26059.1	78663.1	108137	73925	1	1	1	6.7	13.231	1	P01817	Immunoglobulin heavy variable 2-5	IGHV2-5	Immunity	sp|Q9UMX5|NENF_HUMAN
NAN	NAN	110608	NAN	NAN	35337.2	NAN	NAN	90516.9	NAN	NAN	55269.7	NAN	NAN	56981.3	NAN	NAN	49777.3	66415.1	2	1	1	27	12.537	2	A0A0C4DH67	Immunoglobulin kappa variable 1-8	IGKV1-8	Immunity	sp|Q9NQX5|NPDC1_HUMAN
51901.9	111586	48068.4	47036.7	99547.7	47958.5	52677.5	93358.9	62280.8	48540.5	68622.8	49867.1	48851	107740	34244.9	44293.3	124406	43750.1	66637.1	2	2	2	4.8	50.827	1	Q68D85	Natural cytotoxicity triggering receptor 3 ligand 1	NCR3LG1	Immunity	sp|P41271|NBL1_HUMAN
64790.7	NAN	NAN	46550.2	NAN	NAN	88427	NAN	NAN	55388.5	NAN	NAN	75532	NAN	NAN	44598.3	NAN	NAN	62099.2	3	3	3	4.4	83.267	1	P06681	Complement C2	C2	Immunity	sp|O14786|NRP1_HUMAN
17260.7	NAN	402687	20731	NAN	79138.9	22379.7	NAN	186899	15793	NAN	112878	30058.8	NAN	138191	11881.3	NAN	139683	105484	3	2	1	26.8	12.011	1	P01717	Immunoglobulin lambda variable 3-25	IGLV3-25	Immunity	sp|Q14697|GANAB_HUMAN
85830.3	110271	59392.8	91895.1	102467	22756.6	96096.7	73742.1	33333.8	57925.1	43097	26899.7	120828	110862	29075.2	49337.6	92926.3	17419.3	66960.3	1	1	1	8.4	12.773	1	A0A075B6H9	Immunoglobulin lambda variable 4-69	IGLV4-69	Immunity	sp|P08246|ELNE_HUMAN
NAN	58437.2	92310	NAN	54808	40305.8	NAN	111640	59864	NAN	31159.8	37153.2	NAN	82117.4	44607.5	NAN	63567.4	38682.7	59554.5	3	1	1	27	12.496	2	P01624	Immunoglobulin kappa variable 3-15	IGKV3-15	Immunity	sp|P80188|NGAL_HUMAN
NAN	46724.8	79391.7	NAN	58843.7	59839.1	NAN	36403.8	78870.6	NAN	23591.8	70161.9	NAN	64606.9	65891.3	NAN	33663.6	50672	55721.7	1	1	1	6.3	25.518	1	Q9UBS3	DnaJ homolog subfamily B member 9	DNAJB9	Immunity	sp|P61916|NPC2_HUMAN
NAN	NAN	80779.4	NAN	NAN	45437.6	NAN	NAN	62753.1	NAN	NAN	45258.5	NAN	NAN	56505.4	NAN	NAN	29873.9	53434.7	1	1	1	3	38.224	1	P17693	HLA class I histocompatibility antigen, alpha chain G	HLA-G	Immunity	sp|Q9UNZ2|NSF1C_HUMAN
35949.9	43261.6	123658	36215	51148.3	88592.7	41487.8	49601.6	118440	17989.9	14186.2	53172.8	81873	101922	138574	21557.5	38176.6	34969.3	62048.6	2	2	2	13.1	13.527	2	P0DJI9	Serum amyloid A-2 protein	SAA2	Immunity	sp|Q02818|NUCB1_HUMAN
65445.2	NAN	72520.4	46308.8	NAN	43604.8	69335.2	NAN	53840.3	38285.2	NAN	34064.9	90322.6	NAN	48557.3	27867.6	NAN	40656.5	51396.7	2	1	1	22.2	13.008	3	A0A0C4DH29	Immunoglobulin heavy variable 1-3	IGHV1-3	Immunity	sp|P80303|NUCB2_HUMAN
NAN	52455.3	71422.9	NAN	48332.3	39759.2	NAN	47213.1	62709.7	NAN	28439.3	24935.3	NAN	83802.2	46043.2	NAN	62185.9	37279.6	50381.5	2	1	1	20.5	13.085	1	P23083	Immunoglobulin heavy variable 1-2	IGHV1-2	Immunity	sp|P15531|NDKA_HUMAN
NAN	37889.2	175462	NAN	29752	66547.6	NAN	22703.1	99217	NAN	12195.8	53881.4	NAN	27613.8	91001.3	NAN	27099.9	54136	58124.9	1	1	1	13.6	12.301	1	P01703	Immunoglobulin lambda variable 1-40	IGLV1-40	Immunity	sp|P22392|NDKB_HUMAN;sp|O60361|NDK8_HUMAN
89165.6	57465.2	48702.2	82763.1	60084.3	21913	88641.8	44874.2	35378.9	50552.7	20586.3	18219.6	138028	68437.5	29571.1	44440.9	38474.1	19034.1	51009.8	1	1	1	9.5	12.506	1	P01766	Immunoglobulin heavy variable 3-13	IGHV3-13	Immunity	sp|Q9H173|SIL1_HUMAN
45693.5	NAN	NAN	36240.1	NAN	NAN	59409.3	NAN	NAN	27684.7	NAN	NAN	130628	NAN	NAN	19140	NAN	NAN	54620.3	1	1	1	10.6	9.7002	1	Q8NFU4	Follicular dendritic cell secreted peptide	FDCSP	Immunity	sp|Q16625|OCLN_HUMAN
34098	21112.4	80695.5	32009.2	22737.7	63894.3	44057.5	15657.9	91901.4	19743.6	20134.8	75296.8	52455.3	33665.9	66033	43472	22674.8	55181.6	44748.4	2	2	2	7.7	34.516	1	Q9NQX5	Neural proliferation differentiation and control protein 1	NPDC1	Immunity	sp|Q6UX06|OLFM4_HUMAN
NAN	36124.8	NAN	NAN	34242.5	NAN	NAN	46527.6	NAN	NAN	18019.9	NAN	NAN	67191.9	NAN	NAN	39258	NAN	40227.4	2	1	1	16.5	12.387	1	A0A075B6K2	Immunoglobulin lambda variable 3-12	IGLV3-12	Immunity	sp|Q8NGS4|O13F1_HUMAN
60305.4	29677.9	50262.7	46514.7	26881	34843.5	77881.9	25281.6	45798.1	37135.2	15395.3	31570.7	85818.4	31671.6	36062.2	50549.2	30662.8	27103.7	40183	1	1	1	5.9	22.277	1	P07360	Complement component C8 gamma chain	C8G	Immunity	sp|Q99650|OSMR_HUMAN
26196.7	33575	133188	25535.2	37215.1	44262.6	27404	26697.2	74080.2	16003.5	19665.8	45535.4	45475.4	53327.8	48956.1	15943.7	27898.5	37821	41916.7	2	2	1	7.1	11.893	1	P01705	Immunoglobulin lambda variable 2-23	IGLV2-23	Immunity	sp|P10451|OSTP_HUMAN
102980	NAN	35999.8	80689.9	NAN	13843.3	82145.8	NAN	22921.3	47370.5	NAN	17019.5	147270	NAN	14658	44471.7	NAN	13410.7	47254.5	2	2	2	12.5	18.545	1	Q9Y6Y9	Lymphocyte antigen 96	LY96	Immunity	sp|Q9NWT1|PK1IP_HUMAN
138066	7982.92	98081.9	87944.2	5378.17	49629.1	129950	10140.9	93871.5	72747	3191.68	54709.4	170936	8135.98	59681.7	69672.4	7144.91	50672	57639.4	2	2	2	2.8	71.981	1	Q8N307	Mucin-20	MUC20	Immunity	sp|P40926|MDHM_HUMAN
8892.05	20840.5	189810	9936.35	20830.4	164075	16102.5	28005.1	63180.9	3693.06	4149.72	39784	17873.1	28370.4	96116.7	12162.9	21817.5	65631.5	47198.8	4	4	4	36.6	10.834	1	P05109	Protein S100-A8	S100A8	Immunity	sp|P43490|NAMPT_HUMAN
27525.9	NAN	NAN	25956.4	NAN	NAN	28117.9	NAN	NAN	18043.6	NAN	NAN	38041.9	NAN	NAN	21040.8	NAN	NAN	26240.1	1	1	1	10.9	11.305	2	Q86SG5	Protein S100-A7A	S100A7A	Immunity	sp|Q71DI3|H32_HUMAN;sp|Q16695|H31T_HUMAN;sp|P84243|H33_HUMAN;sp|P68431|H31_HUMAN;sp|Q6NXT2|H3C_HUMAN
NAN	NAN	62190.2	NAN	NAN	15238.1	NAN	NAN	17367.5	NAN	NAN	10152.9	NAN	NAN	17581.9	NAN	NAN	10004.1	22089.1	2	1	1	13.3	12.597	1	P01704	Immunoglobulin lambda variable 2-14	IGLV2-14	Immunity	sp|P50897|PPT1_HUMAN
NAN	17360.2	NAN	NAN	10222.8	NAN	NAN	40755.3	NAN	NAN	5236.55	NAN	NAN	15843.5	NAN	NAN	20475.3	NAN	18315.6	1	1	1	3.8	38.714	1	P04083	Annexin A1	ANXA1	Immunity	sp|P12272|PTHR_HUMAN
47311.4	10013.8	10673.2	33930.6	9999.91	3990.07	56603.4	10073.7	8040.67	22929.2	6076.82	6897.7	88906.4	13767.7	7565.4	29952.7	8174.42	3851.75	19496.9	2	2	2	5.3	31.742	1	Q9BXJ1	Complement C1q tumor necrosis factor-related protein 1	C1QTNF1	Immunity	sp|Q9BRP8|PYM1_HUMAN
12710.2	15005.5	19956.9	11269.2	7573.27	7439.55	27577.4	15870.9	13695.4	8617.18	2318.38	4777.04	9952.89	7082.29	5838.17	7008.06	7652.95	4322.05	10350.4	1	1	1	0.2	596.33	1	Q9HC84	Mucin-5B	MUC5B	Immunity	sp|O14908|GIPC1_HUMAN
2843.59	1737.5	NAN	2979.18	1709.9	NAN	3040.52	7281.9	NAN	2535.93	755.758	NAN	4879.1	1781.9	NAN	7100.97	1586.68	NAN	3217.21	1	1	1	3.2	30.98	2	Q04118	Basic salivary proline-rich protein 3	PRB3	Immunity	sp|P62937|PPIA_HUMAN
2.30986e+07	2.46486e+07	2.67697e+07	1.63978e+07	2.11551e+07	1.82982e+07	2.20244e+07	1.97028e+07	2.71604e+07	1.7225e+07	1.53411e+07	2.32608e+07	2.62843e+07	2.5069e+07	1.84779e+07	1.2131e+07	1.68075e+07	1.89856e+07	2.05729e+07	63	63	63	49	166.01	1	P22897	Macrophage mannose receptor 1	MRC1	Immunity	sp|P23284|PPIB_HUMAN
1.11314e+06	1.09462e+06	967096	988239	1.16913e+06	736334	1.11987e+06	1.09303e+06	905089	1.08698e+06	1.02323e+06	691179	1.36219e+06	1.7155e+06	577315	1.46249e+06	2.08715e+06	812439	1.11129e+06	11	11	11	42.8	31.54	2	P22676	Calretinin	CALB2	Other	sp|P45877|PPIC_HUMAN
577435	167465	464011	491694	165240	254993	654394	204735	331833	491080	100337	202253	763728	220436	209255	730994	254799	233976	349484	7	7	7	38.3	16.837	5	P0DP25	Calmodulin-3	CALM3	Other	sp|P62942|FKB1A_HUMAN
225146	378727	307835	183332	339347	174069	298713	410721	280084	232585	351728	183434	298465	489110	184122	268991	722231	239855	314315	6	6	5	26.8	26.927	1	Q9BUP0	EF-hand domain-containing protein D1	EFHD1	Other	sp|Q02790|FKBP4_HUMAN
NAN	NAN	299625	NAN	NAN	244928	NAN	NAN	286704	NAN	NAN	334003	NAN	NAN	106198	NAN	NAN	426859	283053	1	1	1	0.3	514.83	1	Q8IVF4	Dynein heavy chain 10, axonemal	DNAH10	Other	sp|Q99541|PLIN2_HUMAN
394099	172018	361992	317655	136752	162030	488737	166101	298775	303135	96973.3	168303	547235	192513	191635	356119	142777	158618	250669	7	7	7	25.4	38.429	2	P51884	Lumican	LUM	Other	sp|O60664|PLIN3_HUMAN
68049.6	250404	347608	67495.3	184876	165779	87397.2	470978	374006	64732.4	138824	168747	86433.3	226869	119861	67528.1	571582	179584	210159	8	8	8	23.9	38.604	2	P07355	Annexin A2	ANXA2	Other	sp|Q06830|PRDX1_HUMAN
63920.9	283679	347439	43085.1	283345	190311	84783.7	247780	295541	56807.7	182964	212735	81799.3	367351	202800	65069.8	245796	192941	199072	6	6	6	14	51.927	1	P48723	Heat shock 70 kDa protein 13	HSPA13	Other	sp|P32119|PRDX2_HUMAN
NAN	135150	290303	NAN	145736	138229	NAN	160521	223823	NAN	117427	118703	NAN	217884	166886	NAN	212220	111262	169845	4	4	4	23	24.831	1	P62906	60S ribosomal protein L10a	RPL10A	Other	sp|Q13162|PRDX4_HUMAN
178208	142579	281798	122898	124588	117908	217657	134664	241372	157185	105092	151127	224274	167477	134272	201316	140626	157359	166011	1	1	1	7.8	19.116	1	O60888	Protein CutA	CUTA	Other	sp|P30044|PRDX5_HUMAN
194633	539327	83379.2	149057	467174	40457	209342	451073	60523.2	134935	296711	42630.5	253004	673118	40679.1	106981	394838	31391.8	233801	4	4	4	10.9	41.496	1	O75503	Ceroid-lipofuscinosis neuronal protein 5	CLN5	Other	sp|P30041|PRDX6_HUMAN
113254	124959	343369	101330	147025	161783	184876	183586	215615	102987	85539.3	134963	123009	185737	149315	122311	230195	127514	160242	4	4	4	40.2	10.932	1	P61604	10 kDa heat shock protein, mitochondrial	HSPE1	Other	sp|P30086|PEBP1_HUMAN
NAN	151399	434923	NAN	139528	102823	NAN	147443	173997	NAN	103037	99768.7	NAN	177985	91469.3	NAN	202983	152622	164832	9	2	2	11.3	68.563	1	P35241	Radixin	RDX	other	sp|Q96S96|PEBP4_HUMAN
232811	184863	119074	188539	187834	75375.1	227325	152505	111262	173707	115553	90579.7	284960	248279	77876.5	167558	172675	70708.7	155804	5	5	5	15.7	41.806	1	Q9BRK5	45 kDa calcium-binding protein	SDF4	Other	sp|Q00169|PIPNA_HUMAN
49550.1	383642	296629	37390.9	306048	115971	70762.6	349274	236405	39988.6	215884	149667	76868.2	448019	140918	31185.8	275826	88427	191936	4	4	4	4.6	103.13	1	O14786	Neuropilin-1	NRP1	Other	sp|P36871|PGM1_HUMAN
141231	95837.3	257837	118481	68059.1	301271	80188.1	82248.4	288798	128624	61100.6	228162	80773.8	85072.2	241975	117459	182179	422883	167115	1	1	1	0.6	187.62	1	P52179	Myomesin-1	MYOM1	Other	sp|Q96G03|PGM2_HUMAN
69798.1	111633	570908	71244.9	97600.4	280784	90016.4	136534	295193	56345	70468.9	185866	120703	152041	219247	56705.5	113474	239655	168731	8	1	1	24.5	41.876	4	P63267	Actin, gamma-enteric smooth muscle	ACTG2	other	sp|P00558|PGK1_HUMAN
150802	NAN	NAN	88635.7	NAN	NAN	160198	NAN	NAN	152115	NAN	NAN	96698.1	NAN	NAN	95717.8	NAN	NAN	118673	1	1	1	0.3	780.6	1	Q5CZC0	Fibrous sheath-interacting protein 2	FSIP2	Other	sp|P15259|PGAM2_HUMAN;sp|Q8N0Y7|PGAM4_HUMAN;sp|P18669|PGAM1_HUMAN
134850	NAN	NAN	99921	NAN	NAN	152431	NAN	NAN	109373	NAN	NAN	202702	NAN	NAN	56874.7	NAN	NAN	124260	1	1	1	8.2	22.976	1	A6NJ08	Putative methyl-CpG-binding domain protein 3-like 5	MBD3L5	Other	sp|Q96FE7|P3IP1_HUMAN
234935	101218	80745.8	200050	87252	84660.4	217823	91348.9	91386.9	194526	75610.6	68837.2	277072	126169	63704.2	176903	102752	77483.4	124561	5	5	5	37	15.85	1	P09455	Retinol-binding protein 1	RBP1	other	sp|P36969|GPX4_HUMAN
129393	77698.5	225505	148273	79314.7	159622	144920	69498.8	209588	95380.1	31995.9	131874	212927	120511	167825	88678.7	42891.4	107778	124370	4	4	4	9.1	54.64	1	Q12805	EGF-containing fibulin-like extracellular matrix protein 1	EFEMP1	Other	sp|P55058|PLTP_HUMAN
NAN	135309	NAN	NAN	66220.9	NAN	NAN	133197	NAN	NAN	125341	NAN	NAN	79435.7	NAN	NAN	134486	NAN	112332	1	1	1	2.6	55.632	1	Q5JU00	Dynein regulatory complex subunit 5	TCTE1	Other	sp|P36955|PEDF_HUMAN
105757	NAN	NAN	79034.8	NAN	NAN	132167	NAN	NAN	83465.9	NAN	NAN	169650	NAN	NAN	61037.2	NAN	NAN	105071	1	1	1	1.8	91.998	1	Q16620	BDNF/NT-3 growth factors receptor	NTRK2	Other	sp|Q9BTY2|FUCO2_HUMAN
106338	78098.1	NAN	83246.4	81448.5	NAN	120678	87773.6	NAN	123899	53139.6	NAN	107614	119347	NAN	118424	104078	NAN	97976.7	2	2	2	12.2	18.856	1	Q9UMX5	Neudesin	NENF	Other	sp|P05155|IC1_HUMAN
NAN	131154	96363.6	NAN	123102	67434.5	NAN	155753	71531.9	NAN	76078.4	54531.4	NAN	174685	51425.6	NAN	192247	56933.9	104270	3	3	3	13	31.35	1	P47756	F-actin-capping protein subunit beta	CAPZB	Other	sp|P05154|IPSP_HUMAN
58587.3	111888	132810	47383.6	121038	109738	60063.5	136203	128259	46965.1	84508	94485.2	63373.8	140052	91469.3	53490.7	187834	104780	100844	2	2	2	15.7	11.164	1	P51397	Death-associated protein 1	DAP1	Other	sp|P00747|PLMN_HUMAN
21797.9	210710	123950	20414.4	237983	103739	21849.3	205403	123924	18553.5	200022	107643	35855.3	401656	100979	21772.2	333471	95380.1	139018	3	2	2	14.5	18.506	1	P60981	Destrin	DSTN	Other	sp|Q8NC51|PAIRB_HUMAN
14510.4	237275	305434	12555.2	207004	209472	12413.3	205289	292201	10091.1	130004	192140	15844.6	265362	200925	10091.8	222925	157621	158038	7	7	7	11.6	71.438	1	Q86X29	Lipolysis-stimulated lipoprotein receptor	LSR	Other	sp|Q14651|PLSI_HUMAN
107681	90529.5	NAN	97343.7	84262.3	NAN	119686	97134.8	NAN	87658.1	47663.6	NAN	124890	96879.2	NAN	102702	82373.9	NAN	93738.5	2	2	2	7.5	23.01	1	P02753	Retinol-binding protein 4	RBP4	Other	sp|P13796|PLSL_HUMAN
NAN	85456.3	110287	NAN	77365.4	67243.2	NAN	105787	97790	NAN	69720.7	69239.1	NAN	133947	60393.3	NAN	163089	81369.5	93473.9	1	1	1	0.4	228.52	1	Q5TZA2	Rootletin	CROCC	Other	sp|P16671|CD36_HUMAN
86427.3	NAN	NAN	84983.8	NAN	NAN	86451.3	NAN	NAN	64975.1	NAN	NAN	108670	NAN	NAN	69162.4	NAN	NAN	82848.6	2	2	2	5.3	48.864	1	Q6P4E1	Protein CASC4	CASC4	Other	sp|Q6UX71|PXDC2_HUMAN
61675.1	NAN	195296	64710	NAN	58802.9	85646.1	NAN	116624	55403.9	NAN	68889.7	86391.4	NAN	71760.4	65517.8	NAN	62475.4	84683.3	3	3	3	29.8	12.774	1	O75368	SH3 domain-binding glutamic acid-rich-like protein	SH3BGRL	Other	sp|O00592|PODXL_HUMAN
60030.2	221800	87524.5	45230.2	201679	40865.6	65331.9	176940	66042.2	39742.6	104700	25330.7	79910.6	235554	59880.6	54320.2	157195	28856.3	99464.9	4	4	4	8.2	52.816	1	O15232	Matrilin-3	MATN3	OTHER	sp|Q9NX46|ARHL2_HUMAN
118992	35374	379489	97283	40871.3	68508.7	253408	61058.3	120177	60602.9	12919.8	65169.1	282423	92765.5	87451.8	66713.9	29969.3	55889.9	106475	3	3	3	15.4	22.739	1	Q96DA0	Zymogen granule protein 16 homolog B	ZG16B	Other	sp|Q15365|PCBP1_HUMAN;sp|Q15366|PCBP2_HUMAN;sp|P57721|PCBP3_HUMAN
NAN	NAN	149678	NAN	NAN	64907.6	NAN	NAN	100679	NAN	NAN	52886.1	NAN	NAN	79149.9	NAN	NAN	45500.7	82133.5	2	1	1	11.7	20.511	1	P18085	ADP-ribosylation factor 4	ARF4	other	sp|P11940|PABP1_HUMAN;sp|Q9H361|PABP3_HUMAN
88102.8	205617	46585.7	63668.8	168198	20138.9	122932	182710	33551.7	69914.3	135939	18695.5	147924	277822	25202.9	67546.8	198008	18027.4	106028	2	2	2	16.1	21.768	3	P61586	Transforming protein RhoA	RHOA	Other	sp|Q9H074|PAIP1_HUMAN
NAN	32193.9	143660	NAN	34428.1	110792	NAN	40325.4	134058	NAN	26490.7	119463	NAN	52360.8	109267	NAN	49863.6	104991	79824.5	4	1	1	6.2	71.027	2	P17066	Heat shock 70 kDa protein 6	HSPA6	Other	sp|P01833|PIGR_HUMAN
50203.5	86015	76932.2	42814.1	86565.2	84584.2	48285.4	78783.2	108002	43868.6	39775.7	60901.9	37142.9	92316.4	60213.5	44613.7	122779	66023.9	69389.2	1	1	1	0.4	231.6	1	Q92817	Envoplakin	EVPL	Other	sp|Q10471|GALT2_HUMAN
NAN	62718.4	NAN	NAN	64804.2	NAN	NAN	60842.8	NAN	NAN	46864.2	NAN	NAN	75208.1	NAN	NAN	77725.5	NAN	64693.9	1	1	1	8.2	20.7	1	P55145	Mesencephalic astrocyte-derived neurotrophic factor	MANF	Other	sp|Q15652|JHD2C_HUMAN
55619.4	NAN	NAN	44672.5	NAN	NAN	75166.4	NAN	NAN	57218.7	NAN	NAN	67701.5	NAN	NAN	80645.1	NAN	NAN	65080.9	3	3	3	3.1	124.57	1	P54289	Voltage-dependent calcium channel subunit alpha-2/delta-1	CACNA2D1	Other	sp|Q9H3G5|CPVL_HUMAN
53276.1	106552	54244.9	39817.1	84139.8	29228.7	45513.3	118260	52183.3	50890.2	61696.5	25791.4	44440.9	131993	30154.8	65836.5	173395	37367.6	67735.5	4	4	4	37.7	15.892	1	Q9NZT1	Calmodulin-like protein 5	CALML5	Other	sp|O00507|USP9Y_HUMAN
69311.2	NAN	NAN	57286.2	NAN	NAN	74008.3	NAN	NAN	33269.2	NAN	NAN	93865	NAN	NAN	49334.2	NAN	NAN	61552.6	4	4	4	5.5	86.942	1	P05067	Amyloid-beta A4 protein	APP	Other	sp|P09668|CATH_HUMAN
NAN	NAN	139712	NAN	NAN	36955.5	NAN	NAN	73870	NAN	NAN	45842.6	NAN	NAN	49034.2	NAN	NAN	40317	64288.6	1	1	1	0.3	564.56	1	Q92736	Ryanodine receptor 2	RYR2	Other	sp|P01133|EGF_HUMAN
NAN	28986.6	181549	NAN	28756.5	68575.2	NAN	54478.5	105078	NAN	18959.1	58843.7	NAN	34497.4	69373.6	NAN	45064.4	48530.4	61891	3	3	3	10.5	32.95	5	P06753	Tropomyosin alpha-3 chain	TPM3	other	sp|P07737|PROF1_HUMAN
NAN	59698.2	NAN	NAN	51343.7	NAN	NAN	60176	NAN	NAN	25383.4	NAN	NAN	79496.3	NAN	NAN	40930.8	NAN	52838.1	1	1	1	0.5	186.79	1	Q14766	Latent-transforming growth factor beta-binding protein 1	LTBP1	other	sp|P12273|PIP_HUMAN
NAN	NAN	148768	NAN	NAN	12505.7	NAN	NAN	86086.5	NAN	NAN	26810.3	NAN	NAN	53743.4	NAN	NAN	37158.4	60845.3	1	1	1	5.6	52.145	1	P31644	Gamma-aminobutyric acid receptor subunit alpha-5	GABRA5	other	sp|O43490|PROM1_HUMAN
51414.9	NAN	NAN	40563.7	NAN	NAN	54505	NAN	NAN	36102.2	NAN	NAN	62458.1	NAN	NAN	34816.9	NAN	NAN	45689.2	1	1	1	5.4	22.655	1	Q9BRP8	Partner of Y14 and mago	PYM1	other	sp|P07602|SAP_HUMAN
NAN	24268.5	89611.7	NAN	24627.8	62354.2	NAN	22371.9	97878.2	NAN	17478.6	71131.5	NAN	35008.1	63409	NAN	26912.7	56681.9	49311.2	2	2	2	39.3	9.6981	1	P30047	GTP cyclohydrolase 1 feedback regulatory protein	GCHFR	other	sp|Q14914|PTGR1_HUMAN
38319.7	NAN	NAN	26280.4	NAN	NAN	69715.9	NAN	NAN	20383.3	NAN	NAN	50137.4	NAN	NAN	31492	NAN	NAN	39601.8	1	1	1	1.5	109.74	1	Q8NAT2	Tudor domain-containing protein 5	TDRD5	Other	sp|Q16651|PRSS8_HUMAN
NAN	25954.6	NAN	NAN	27163.8	NAN	NAN	37899.7	NAN	NAN	27850.2	NAN	NAN	38097.3	NAN	NAN	58986.6	NAN	35992	1	1	1	9.7	19.979	1	O95994	Anterior gradient protein 2 homolog	AGR2	other	sp|Q06323|PSME1_HUMAN
34708.5	NAN	NAN	29526	NAN	NAN	31272.3	NAN	NAN	16758.4	NAN	NAN	45500.7	NAN	NAN	17965	NAN	NAN	28204.5	2	2	2	1.9	134.55	1	Q92896	Golgi apparatus protein 1	GLG1	other	sp|P28066|PSA5_HUMAN
NAN	93384.8	14951.5	NAN	95519	7310.22	NAN	91748.7	6992.05	NAN	40891.1	9999.91	NAN	179000	8261	NAN	58498	3617.81	50847.8	2	2	2	5	45.391	2	Q6UX73	UPF0764 protein C16orf89	C16orf89	other	sp|P60900|PSA6_HUMAN
18576.6	14551.7	89425.6	19482.6	14098	38642.5	22327	16186.5	45595.4	15055.5	7299.59	27524	28141.3	23242.9	61274.5	17296.6	15197	30777.7	28595.2	1	1	1	3.6	27.661	1	P04156	Major prion protein	PRNP	other	sp|Q96IU4|ABHEB_HUMAN
NAN	16972.4	33799.2	NAN	13513.4	19966.6	NAN	26834.5	23660.6	NAN	8010.63	15049.2	NAN	19997.1	16791	NAN	18858.1	15366.5	19068.3	1	1	1	9.7	15.33	1	P00167	Cytochrome b5	CYB5A	other	sp|P02760|AMBP_HUMAN
NAN	11790.2	NAN	NAN	10227	NAN	NAN	10441.9	NAN	NAN	5878.37	NAN	NAN	13776.3	NAN	NAN	10578.2	NAN	10448.7	2	1	1	3.3	70.253	1	Q14651	Plastin-1	PLS1	other	sp|Q6P4E1|CASC4_HUMAN
1611.62	2273.03	526.19	2831.2	1401.83	79.0942	720.598	1993.52	175.2	2216.86	1212.44	NAN	1068.23	1973.44	NAN	1290.22	1786.47	NAN	1396.31	2	2	2	2.1	435.16	2	P20930	Filaggrin	FLG	other	sp|O75629|CREG1_HUMAN
1.0817e+07	9.2704e+06	2.11668e+07	5.40926e+06	6.71427e+06	4.82467e+06	1.1964e+07	1.12101e+07	1.42524e+07	4.90561e+06	3.10078e+06	5.41902e+06	1.46805e+07	1.63433e+07	8.95772e+06	5.40776e+06	8.28173e+06	4.28719e+06	9.18798e+06	16	16	16	45.4	47.65	1	P01011	Alpha-1-antichymotrypsin	SERPINA3	Protease inhibitor	sp|O60888|CUTA_HUMAN
3.98017e+06	3.56211e+06	5.93617e+06	2.90317e+06	3.79692e+06	2.98459e+06	4.85016e+06	3.80879e+06	4.67845e+06	3.54241e+06	1.89886e+06	2.81831e+06	4.50626e+06	4.02651e+06	3.4611e+06	3.73791e+06	3.09734e+06	2.71515e+06	3.66613e+06	17	17	17	50.7	46.736	2	P01009	Alpha-1-antitrypsin	SERPINA1	Protease inhibitor	sp|O75144|ICOSL_HUMAN
1.4629e+06	2.12436e+06	3.08898e+06	1.21658e+06	2.10502e+06	2.43823e+06	1.83075e+06	2.05414e+06	2.87633e+06	1.47645e+06	1.61802e+06	2.32194e+06	2.0343e+06	2.60942e+06	1.7374e+06	1.60062e+06	2.72836e+06	2.32468e+06	2.12856e+06	22	22	22	53.7	50.663	2	P50395	Rab GDP dissociation inhibitor beta	GDI2	Protease inhibitor	sp|P07237|PDIA1_HUMAN
2.283e+06	2.59805e+06	2.18985e+06	1.72289e+06	2.26629e+06	1.47758e+06	2.22134e+06	2.24752e+06	2.15372e+06	1.76361e+06	1.64665e+06	1.75995e+06	2.50938e+06	2.80856e+06	1.35025e+06	1.54353e+06	2.29395e+06	1.67427e+06	2.01338e+06	6	6	6	47.9	15.799	1	P01034	Cystatin-C	CST3	Protease inhibitor	sp|P30101|PDIA3_HUMAN
1.73945e+06	2.11276e+06	2.30718e+06	1.35091e+06	2.05357e+06	1.72552e+06	1.89491e+06	1.95454e+06	2.34052e+06	1.42546e+06	1.3621e+06	1.71824e+06	2.3107e+06	2.58208e+06	1.62713e+06	1.16033e+06	1.82859e+06	1.42952e+06	1.83436e+06	17	17	17	37.3	52.602	2	P01008	Antithrombin-III	SERPINC1	Protease inhibitor	sp|P13667|PDIA4_HUMAN
1.33314e+06	1.45794e+06	1.78538e+06	1.18241e+06	1.52059e+06	1.12758e+06	1.45976e+06	1.40166e+06	1.73548e+06	961215	831467	1.19031e+06	1.78464e+06	2.01061e+06	1.12977e+06	1.0627e+06	1.44877e+06	1.13724e+06	1.36632e+06	12	12	12	23.8	58.397	1	O43278	Kunitz-type protease inhibitor 1	SPINT1	Protease inhibitor	sp|Q9H098|F107B_HUMAN
886032	893805	1.42546e+06	583754	797376	510093	1.28853e+06	984683	1.00677e+06	793296	440902	406107	1.19834e+06	1.25983e+06	711350	562736	717938	443600	824975	10	10	10	21.8	55.154	2	P05155	Plasma protease C1 inhibitor	SERPING1	Protease inhibitor	sp|P58499|FAM3B_HUMAN
831179	564416	733888	567555	552150	449045	836497	533711	677894	513534	294009	414870	1.15423e+06	876929	536084	577836	496144	431290	600593	8	8	8	16.3	54.565	2	P08697	Alpha-2-antiplasmin	SERPINF2	Protease inhibitor	sp|Q92520|FAM3C_HUMAN
871777	624092	441759	639019	480841	233992	1.05083e+06	611715	379069	582824	414324	238743	1.24559e+06	712930	282306	584280	510623	214215	543950	14	14	14	16.6	103.36	2	Q14624	Inter-alpha-trypsin inhibitor heavy chain H4	ITIH4	Protease inhibitor	sp|Q13438|OS9_HUMAN
514211	340006	822069	419003	301521	690940	377156	279076	840856	348331	234235	677049	516568	362419	606816	290424	326834	645698	475235	7	7	7	45.4	23.171	1	P01033	Metalloproteinase inhibitor 1	TIMP1	Protease inhibitor	sp|Q15435|PP1R7_HUMAN
1.05799e+06	457940	486540	741712	607784	226413	906847	173130	488907	619180	143630	308840	1.52598e+06	474090	303135	590714	494428	171768	513002	7	7	7	20	45.674	1	P05154	Plasma serine protease inhibitor	SERPINA5	Protease inhibitor	sp|P23297|S10A1_HUMAN
657577	289419	496970	503349	275291	278284	872140	316665	474978	532713	198888	287400	839866	351508	304229	574959	288098	312306	423357	7	7	7	18.5	45.14	1	P08185	Corticosteroid-binding globulin	SERPINA6	Protease inhibitor	sp|P31949|S10AB_HUMAN
477288	578076	298796	396181	512609	191449	455124	538057	288338	389483	327401	188578	518757	618923	176756	296259	492956	151515	377603	6	6	6	22.7	38.999	1	P02760	Protein AMBP	AMBP	Protease inhibitor	sp|P80511|S10AC_HUMAN
303850	423793	644938	204324	379568	279405	361817	436282	507483	242883	285573	295705	400405	423089	297514	207205	390591	224460	353237	5	5	5	12.7	46.312	2	P36955	Pigment epithelium-derived factor	SERPINF1	Protease inhibitor	sp|Q99584|S10AD_HUMAN
243422	339582	625218	172615	324644	284112	342015	386658	498074	224678	236405	300457	296033	435285	297040	193302	307686	347030	330049	7	7	7	16.4	46.324	2	P05543	Thyroxine-binding globulin	SERPINA7	Protease inhibitor	sp|P06703|S10A6_HUMAN
84233.1	256127	382049	59789.3	279968	165652	98846.3	452827	190972	38940.9	71422.9	93897.6	115971	398494	190945	43526.3	212544	70249.5	183660	2	2	2	25.8	12.993	1	Q14508	WAP four-disulfide core domain protein 2	WFDC2	Protease inhibitor	sp|Q86SG5|S1A7A_HUMAN;sp|P31151|S10A7_HUMAN
104823	NAN	221355	31118.8	NAN	104852	45922.1	NAN	174807	28518.3	NAN	123094	63163.3	NAN	118950	27594.6	NAN	107271	95149.6	2	2	2	20.8	16.511	1	Q15828	Cystatin-M	CST6	Protease inhibitor	sp|P05109|S10A8_HUMAN
NAN	64867.1	188695	NAN	53231.8	73962.2	NAN	67215.2	156370	NAN	22027.2	78391	NAN	78974.5	113836	NAN	44422.4	91513.7	86125.5	2	2	2	6.7	45.214	1	Q9BY76	Angiopoietin-related protein 4	ANGPTL4	Protease inhibitor	sp|P06702|S10A9_HUMAN
NAN	103847	67299.1	NAN	77065.6	48439.6	NAN	154441	57913	NAN	52462.5	34952.3	NAN	91984.3	39479.1	NAN	147249	34430.5	75797	2	2	2	7.4	36.375	1	P12429	Annexin A3	ANXA3	Protease inhibitor	sp|P25815|S100P_HUMAN
146232	28264.4	NAN	140149	26591.9	NAN	222987	36313	NAN	131618	16398.8	NAN	173876	36507.4	NAN	117183	30560.9	NAN	87313.6	3	3	3	10.6	42.741	1	P30740	Leukocyte elastase inhibitor	SERPINB1	Protease inhibitor	sp|O75695|XRP2_HUMAN
37148.1	61555.5	NAN	24413.6	68210.2	NAN	46708.6	69836.8	NAN	22460.5	36057.2	NAN	55777.7	84942.6	NAN	23069.5	53121.2	NAN	49650.3	1	1	1	1	106.46	1	P19823	Inter-alpha-trypsin inhibitor heavy chain H2	ITIH2	Protease inhibitor	sp|Q99497|PARK7_HUMAN
35017.8	NAN	NAN	31341.8	NAN	NAN	35386.2	NAN	NAN	21333	NAN	NAN	44917.8	NAN	NAN	24142.7	NAN	NAN	31424.3	1	1	1	1.1	106.46	1	O95980	Reversion-inducing cysteine-rich protein with Kazal motifs	RECK	Protease inhibitor	sp|P22061|PIMT_HUMAN
12688.2	NAN	NAN	12556.1	NAN	NAN	16354.5	NAN	NAN	9261.31	NAN	NAN	18566.3	NAN	NAN	10679.1	NAN	NAN	13483.5	2	2	2	4.2	59.578	1	P04196	Histidine-rich glycoprotein	HRG	Protease inhibitor	sp|P00734|THRB_HUMAN
1.54932e+06	2.64182e+06	3.64908e+06	1.15103e+06	2.89775e+06	2.35272e+06	1.95251e+06	3.19459e+06	2.86023e+06	1.41062e+06	2.35354e+06	1.97265e+06	2.00268e+06	4.05031e+06	2.00796e+06	1.59763e+06	4.2502e+06	2.31664e+06	2.50953e+06	26	26	21	44.7	70.897	4	P11142	Heat shock cognate 71 kDa protein	HSPA8	Protein synthesis	sp|P61457|PHS_HUMAN
323140	504537	738122	276209	469869	410209	558540	663345	330823	240637	361516	280084	507553	636632	264242	378544	770054	395248	458010	7	7	7	21.8	38.498	1	P40121	Macrophage-capping protein	CAPG	Protein synthesis	sp|P00491|PNPH_HUMAN
270225	245796	796989	264114	360840	294417	404758	478912	515781	251396	211119	206145	308092	390591	191276	248985	485496	302799	350441	7	7	0	10.9	83.263	1	P08238	Heat shock protein HSP 90-beta	HSP90AB1	Protein synthesis	sp|A6NJ08|MB3L5_HUMAN
NAN	333841	332133	NAN	317457	261853	NAN	360965	309483	NAN	226963	253970	NAN	364182	183969	NAN	347728	241473	294501	1	1	1	0.7	145.83	1	O75533	Splicing factor 3B subunit 1	SF3B1	Protein synthesis	sp|Q8NHP8|PLBL2_HUMAN
245353	NAN	418219	235261	NAN	216709	307878	NAN	335488	194755	NAN	229956	277841	NAN	189968	236126	NAN	199068	258297	5	5	5	26.8	22.782	1	P04792	Heat shock protein beta-1	HSPB1	Protein synthesis	sp|Q9HBR0|S38AA_HUMAN
208545	196082	600124	170664	161805	266782	233328	199316	438586	177370	98327	258302	238396	226523	312025	173768	182977	248193	246033	5	5	5	7.1	111.33	1	Q9Y4L1	Hypoxia up-regulated protein 1	HYOU1	Protein synthesis	sp|Q6ZSK4|NTAS1_HUMAN
356910	132589	206560	315898	148088	183956	400183	151085	196613	327560	112659	157032	451448	203194	119388	546022	277341	183828	241967	3	3	3	33.3	12.855	1	O75347	Tubulin-specific chaperone A	TBCA	Protein synthesis	sp|P14618|KPYM_HUMAN
79910.6	153300	405376	62505.7	137169	181184	94197.4	160665	261400	57099.9	117941	176621	119720	262417	257105	70186.2	215287	186524	171688	6	6	6	10.5	70.67	2	P11940	Polyadenylate-binding protein 1	PABPC1	Protein synthesis	sp|Q08257|QOR_HUMAN
NAN	NAN	238743	NAN	NAN	110900	NAN	NAN	188095	NAN	NAN	106493	NAN	NAN	121374	NAN	NAN	127426	148839	4	4	4	57.4	11.665	1	P05387	60S acidic ribosomal protein P2	RPLP2	Protein synthesis	sp|P50395|GDIB_HUMAN
NAN	147771	221263	NAN	117134	152347	NAN	202885	124518	NAN	65987.3	108783	NAN	251832	124036	NAN	136648	81279.3	144540	4	1	1	5.6	70.051	2	P0DMV9	Heat shock 70 kDa protein 1B	HSPA1B	Protein synthesis	sp|P35241|RADI_HUMAN
NAN	116648	1.08292e+06	NAN	42778.6	71264.7	NAN	233976	226068	NAN	18210.7	73813.6	NAN	116099	197173	NAN	58138.2	79717	193068	4	4	4	36.9	11.367	1	P62805	Histone H4	HIST1H4A	Protein synthesis	sp|P63000|RAC1_HUMAN;sp|P60763|RAC3_HUMAN;sp|P15153|RAC2_HUMAN
NAN	63224.7	696131	NAN	63991.8	72792.4	NAN	40454.1	350025	NAN	39143.9	137522	NAN	161279	254287	NAN	33738.3	87694.6	166690	1	1	1	2.5	45.509	1	Q8N9N2	Activating signal cointegrator 1 complex subunit 1	ASCC1	Protein synthesis	sp|P62491|RB11A_HUMAN;sp|Q15907|RB11B_HUMAN
NAN	167175	186821	NAN	116067	40030.2	NAN	211823	80606	NAN	90341.4	33103.6	NAN	227199	59615.5	NAN	153290	36497.2	116881	2	2	2	12.5	13.936	15	Q99878	Histone H2A type 1-J	HIST1H2AJ	Protein synthesis	sp|P61106|RAB14_HUMAN
46123	244352	100770	51286.8	245608	44920.9	49027.4	246581	66931.6	27702	126721	40130.2	75678.7	427955	70708.7	38935.5	283306	38736.3	128197	4	4	4	12.1	37.497	4	Q15365	Poly(rC)-binding protein 1	PCBP1	Protein synthesis	sp|Q9NP72|RAB18_HUMAN
36871	108753	248055	27109.3	92746.2	107264	64714.4	117753	182495	18943.3	42218.9	78298.7	380992	186304	137312	15396.3	87658.1	94452.4	117086	2	2	2	6	44.794	1	Q9NZH0	G-protein coupled receptor family C group 5 member B	GPRC5B	Protein synthesis	sp|P62820|RAB1A_HUMAN
NAN	78586.8	118909	NAN	73599.1	162176	NAN	228463	68894.4	NAN	35912.5	47630.6	NAN	99162	68508.7	NAN	51725.9	50612.3	90348.4	2	2	2	9.4	21.364	5	P16403	Histone H1.2	HIST1H1C	Protein synthesis	sp|P61019|RAB2A_HUMAN;sp|Q8WUD1|RAB2B_HUMAN
68158.2	102021	95102.8	50040.2	117761	52466.2	84332.4	104251	73471.6	66046.8	67565.5	61406.3	73977.6	170144	42218.9	70132.7	109426	53387	81985.3	3	3	3	6.7	46.971	1	Q9BS26	Endoplasmic reticulum resident protein 44	ERP44	Protein synthesis	sp|P20339|RAB5A_HUMAN;sp|P51148|RAB5C_HUMAN
NAN	20941.8	514282	NAN	19225.1	171946	NAN	24598.8	320286	NAN	11440.8	185634	NAN	36194.9	237012	NAN	15843.5	145031	141870	3	3	2	15.5	20.697	3	P84077	ADP-ribosylation factor 1	ARF1	Protein synthesis	sp|P61020|RAB5B_HUMAN
144489	29524	NAN	115329	27625.3	NAN	164588	34662.8	NAN	131591	20221.5	NAN	179348	40724.2	NAN	163496	45944.4	NAN	86641.3	3	3	3	16.2	26.076	1	Q14696	LRP chaperone MESD	MESD	Protein synthesis	sp|Q9NRW1|RAB6B_HUMAN;sp|P20340|RAB6A_HUMAN;sp|Q14964|RB39A_HUMAN
NAN	43768.3	NAN	NAN	42456.6	NAN	NAN	40580.5	NAN	NAN	40102.4	NAN	NAN	63695.3	NAN	NAN	62401.8	NAN	48834.2	2	2	2	3.3	53.524	1	Q9H074	Polyadenylate-binding protein-interacting protein 1	PAIP1	Protein synthesis	sp|P51149|RAB7A_HUMAN
31640.8	47716.5	174928	28092.6	39114.1	50950.2	30886.7	42885.4	106781	20663.5	20782.8	66179.6	39833.6	62679.2	76358.4	20087.4	54675.2	54637.4	55132.5	1	1	1	0.6	155.14	1	Q7Z591	AT-hook-containing transcription factor	AKNA	Protein synthesis	sp|P11234|RALB_HUMAN;sp|P11233|RALA_HUMAN
69744.9	32319.1	38556.9	65522.4	32666	23247.7	117191	27840.5	35862.8	66889.9	29030.9	31878.6	98504.4	46389.2	29375	109426	75401.2	32840.8	52526	2	2	2	30.4	7.8409	1	P62857	40S ribosomal protein S28	RPS28	Protein synthesis	sp|P62834|RAP1A_HUMAN;sp|P61224|RAP1B_HUMAN;sp|A6NIZ1|RP1BL_HUMAN
19106.8	153758	28593.5	18262.5	134888	16394.2	21080.2	147208	26120.6	15588.6	95883.8	13336.6	26575.3	193973	21327.1	16145	176035	15943.7	65947.8	4	4	4	15.7	44.965	1	Q8NC51	Plasminogen activator inhibitor 1 RNA-binding protein	SERBP1	Protein synthesis	sp|P10586|PTPRF_HUMAN
21542.5	20081.8	200397	20379.1	19687.6	85414.9	26968.7	20966.5	148222	17552.6	7906.37	72435	30169.4	25563.5	109867	18568.9	14379.2	53706.2	52486.2	2	2	2	2.8	75.561	1	Q13438	Protein OS-9	OS9	Protein synthesis	sp|P00352|AL1A1_HUMAN
NAN	9556.06	176047	NAN	10020	89283.1	NAN	9727.14	138076	NAN	7000.29	97330.2	NAN	13790.6	103912	NAN	12403.8	88943.4	63007.4	2	2	2	15.2	14.515	1	P25398	40S ribosomal protein S12	RS12	Protein synthesis	sp|Q9HB40|RISC_HUMAN
17474.9	61470.2	53405.5	15081.6	56286.4	21834.2	27398.3	60188.5	33468.1	12766.7	30786.3	20526.5	37419.4	93891	28405.8	13684.9	61880.6	27094.3	38564	1	1	1	7.8	16.793	3	P63241	Eukaryotic translation initiation factor 5A-1	EIF5A	Protein synthesis	sp|P09455|RET1_HUMAN
27550.7	NAN	NAN	21367	NAN	NAN	43357.7	NAN	NAN	21049.5	NAN	NAN	27533.5	NAN	NAN	17586.7	NAN	NAN	26178.9	1	1	1	1.7	84.87	1	P02786	Transferrin receptor protein 1	TFRC	Protein synthesis	sp|P02753|RET4_HUMAN
19683.5	NAN	21736	15614.5	NAN	16320.5	22632.4	NAN	19834.2	16535.7	NAN	14236.4	23459.7	NAN	13008.8	26771.3	NAN	14956.7	18646	2	2	2	3.6	69.15	1	P23588	Eukaryotic translation initiation factor 4B	EIF4B	Protein synthesis	sp|O95980|RECK_HUMAN
14526.5	NAN	NAN	13238	NAN	NAN	16248.3	NAN	NAN	12525.7	NAN	NAN	21731.5	NAN	NAN	17455.6	NAN	NAN	16239.8	1	1	1	8.1	22.092	1	O43583	Density-regulated protein	DENR	Protein synthesis	sp|P52565|GDIR1_HUMAN
NAN	15047.1	NAN	NAN	13212.4	NAN	NAN	14171.5	NAN	NAN	7377.42	NAN	NAN	20738.2	NAN	NAN	14792.7	NAN	14223.2	1	1	1	9.2	13.373	1	P60866	40S ribosomal protein S20	RPS20	Protein synthesis	sp|P52566|GDIR2_HUMAN
NAN	14259.1	NAN	NAN	14310.6	NAN	NAN	10293.9	NAN	NAN	8031.2	NAN	NAN	26068.1	NAN	NAN	12795.1	NAN	14293	1	1	1	8.1	10.112	1	P49458	Signal recognition particle 9 kDa protein	SRP9	protein synthesis	sp|P34096|RNAS4_HUMAN
718685	554835	506850	533341	537088	292322	877841	637162	465558	777132	511048	360066	734346	793076	214840	1.01623e+06	1.20826e+06	412604	613683	8	8	8	34.5	28.993	1	P30040	Endoplasmic reticulum resident protein 29	ERP29	Protein synthesis	sp|O00584|RNT2_HUMAN
42606.9	80154.7	337493	42483.1	86956.1	138613	57560.8	83119.5	247574	30079.6	46760.4	134449	87834.5	101470	187886	21787.3	66129.2	134198	110856	5	5	5	11.5	52.084	1	Q9H173	Nucleotide exchange factor SIL1	SIL1	Protein synthesis	sp|Q9P2E9|RRBP1_HUMAN
479111	1.16001e+06	1.54406e+06	479742	1.36267e+06	978492	631271	1.26027e+06	1.39797e+06	476990	947916	852299	925132	2.15835e+06	983864	575637	2.42021e+06	925774	1.12239e+06	5	5	5	43	14.728	4	P62987	Ubiquitin-60S ribosomal protein L40	UBA52	Signaling	sp|Q5TZA2|CROCC_HUMAN
1.14586e+06	951009	1.51082e+06	938567	1.03321e+06	741250	1.20893e+06	827328	1.08157e+06	867077	642261	735110	1.62747e+06	1.30688e+06	737253	918678	871234	614733	977258	18	18	18	14.7	133.99	1	P01133	Pro-epidermal growth factor	EGF	Signaling	sp|Q92736|RYR2_HUMAN
1.00712e+06	1.13511e+06	1.08978e+06	701897	1.00308e+06	665187	897654	989541	1.04662e+06	702140	730133	872624	1.00509e+06	1.22436e+06	639950	631621	1.13157e+06	697484	891991	8	8	8	31.9	25.982	1	P58499	Protein FAM3B	FAM3B	Signaling	sp|Q9NV23|SAST_HUMAN
716844	701897	497936	639019	677424	341731	783677	652989	468017	603670	524652	330479	945882	952395	281466	1.07701e+06	1.24378e+06	431679	656100	13	13	13	41.1	38.868	1	O14745	Na(+)/H(+) exchange regulatory cofactor NHE-RF1	SLC9A3R1	Signaling	sp|Q6X4U4|SOSD1_HUMAN
574441	407884	1.18471e+06	438920	355429	735212	532640	362419	1.17124e+06	433749	270337	855258	692666	462566	760822	379463	359666	756982	597645	6	6	6	6.9	110.51	1	Q99650	Oncostatin-M-specific receptor subunit beta	OSMR	Signaling	sp|Q8N474|SFRP1_HUMAN
586268	213474	2.55254e+06	408847	274624	215690	690317	448454	646908	350949	140489	269701	1.0966e+06	690269	562854	970521	838063	341754	630120	4	4	4	34.2	16.572	1	P12273	Prolactin-inducible protein	PIP	Signaling	sp|P49908|SEPP1_HUMAN
738532	317919	929761	448267	166228	376424	899523	152897	1.45118e+06	1.09873e+06	313260	724035	283463	144399	614861	1.04459e+06	400377	958554	607321	1	1	1	1.4	152.98	2	Q07890	Son of sevenless homolog 2	SOS2	Signaling	sp|Q9NPR2|SEM4B_HUMAN
246888	647760	1.05572e+06	215466	550965	605178	244877	582541	904274	211427	421859	708840	292890	685264	582703	186136	645251	579561	536513	4	4	4	21.6	24.68	1	Q92520	Protein FAM3C	FAM3C	Signaling	sp|P34896|GLYC_HUMAN
587366	428311	658078	450011	419846	238198	760032	402883	511474	440750	318448	275520	803701	592600	327106	479377	354223	254799	453845	8	8	8	18.1	53.154	1	P01019	Angiotensinogen	AGT	Signaling	sp|Q969W0|SPTSA_HUMAN
378124	306197	218186	328174	292120	170901	406022	294294	217597	290182	207062	148181	477023	412976	130718	435889	415129	184377	290296	3	3	1	16.3	16.495	1	Q13404	Ubiquitin-conjugating enzyme E2 variant 1	UBE2V1	Signaling	sp|O95084|PRS23_HUMAN
337119	339582	194202	288218	308647	148902	375408	352289	174976	329199	249331	158070	448951	477023	123333	405601	478348	145989	294004	2	2	2	23.4	10.546	1	P23297	Protein S100-A1	S100A1	Signaling	sp|Q9H4A3|WNK1_HUMAN
417987	138009	358994	441208	160332	445943	405404	93449.5	487384	414583	109593	578557	444400	141319	243456	415907	135506	269327	310787	1	1	1	4.1	36.794	1	O75618	Death effector domain-containing protein	DEDD	Signaling	sp|Q13315|ATM_HUMAN
164121	279250	482477	159445	333563	293093	167767	275501	449263	117769	202085	319023	234252	376581	279560	141751	294886	242126	273435	4	4	4	4.2	92.192	1	Q9NPR2	Semaphorin-4B	SEMA4B	Signaling	sp|P02787|TRFE_HUMAN
316841	336699	283109	277802	289861	168210	386980	311139	223033	305011	153811	128303	396044	449200	145514	245200	216844	117549	260842	3	3	3	6	60.179	1	P09603	Macrophage colony-stimulating factor 1	CSF1	Signaling	sp|P02768|ALBU_HUMAN;CON__P02768-1
154591	346429	304757	156131	316402	237110	152146	224149	325252	79955	162547	208285	202983	350171	294846	57925.1	175450	159412	220821	3	3	3	14.7	20.194	1	P12272	Parathyroid hormone-related protein	PTHLH	Signaling	sp|P0DJI9|SAA2_HUMAN;sp|P0DJI8|SAA1_HUMAN
99004.1	241272	312306	119281	265638	170996	107517	232215	259991	55719.7	100122	169697	180295	408195	246598	65495.1	184582	140178	191770	4	4	4	18.2	27.621	1	P52823	Stanniocalcin-1	STC1	Signaling	sp|P27169|PON1_HUMAN
328743	77172.5	358199	294070	84889.6	136090	402241	99155.1	245813	206918	41307	116180	568815	133335	148510	188839	79960.5	129950	194791	6	4	4	26.7	29.174	1	P62258	14-3-3 protein epsilon	YWHAE	Signaling	sp|O75368|SH3L1_HUMAN
237983	100442	124363	208343	109753	104229	266172	108768	128464	222601	95452.8	101421	317369	140782	90135	340100	192994	103123	162030	3	3	3	25.2	15.558	1	Q9H098	Protein FAM107B	FAM107B	Signaling	sp|Q9H299|SH3L3_HUMAN
308990	242967	116551	257623	230355	33705.6	362922	407828	61893.5	234447	111664	20879.5	479144	426652	42023.2	214482	266338	33568	208414	8	8	6	36.7	27.745	1	P63104	14-3-3 protein zeta/delta	YWHAZ	Signaling	sp|Q9HAT2|SIAE_HUMAN
138258	NAN	NAN	126108	NAN	NAN	158838	NAN	NAN	87330.6	NAN	NAN	218792	NAN	NAN	133456	NAN	NAN	144905	2	2	2	9.9	17.138	2	P61088	Ubiquitin-conjugating enzyme E2 N	UBE2N	Signaling	sp|Q99519|NEUR1_HUMAN
217416	104049	159611	182926	81324.4	137284	173997	103051	135328	166447	80701.1	104092	227878	144429	123094	205959	174734	131472	143316	3	3	3	31.5	15.04	1	Q15121	Astrocytic phosphoprotein PEA-15	PEA15	Signaling	sp|P49458|SRP09_HUMAN
120152	140042	223777	113379	117166	96899.4	148860	155947	174407	100909	64979.6	104889	184594	181335	100219	93800	153406	83298.3	131642	1	1	1	0.7	122.42	1	Q9Y3R0	Glutamate receptor-interacting protein 1	GRIP1	Signaling	sp|P61956|SUMO2_HUMAN;sp|Q6EEV6|SUMO4_HUMAN;sp|P55854|SUMO3_HUMAN
NAN	130293	NAN	NAN	121610	NAN	NAN	103337	NAN	NAN	92508.6	NAN	NAN	139703	NAN	NAN	141663	NAN	121519	2	2	2	7.7	19.408	1	P41271	Neuroblastoma suppressor of tumorigenicity 1	NBL1	Signaling	sp|Q13126|MTAP_HUMAN
208777	106560	181423	159534	85729.3	113789	212073	87871	171363	142965	53124.9	109176	228194	113450	112698	124406	56431	85818.4	126153	3	3	3	16	21.099	1	O95998	Interleukin-18-binding protein	IL18BP	Signaling	sp|O95436|NPT2B_HUMAN
132653	91450.3	NAN	95572	92804	NAN	150249	75380.3	NAN	77617.8	37339.1	NAN	217703	120352	NAN	91501	64307.5	NAN	101298	1	1	1	3.1	35.646	1	Q8NGS4	Olfactory receptor 13F1	OR13F1	Signaling	sp|Q8WVQ1|CANT1_HUMAN
229701	33119.7	NAN	191436	31357	NAN	262326	39317.9	NAN	185763	22406	NAN	328310	40069	NAN	216334	39260.7	NAN	126336	2	2	2	23.2	10.871	3	P61956	Small ubiquitin-related modifier 2	SUMO2	Signaling	sp|Q07890|SOS2_HUMAN;sp|Q07889|SOS1_HUMAN
60544.2	49368.4	214869	49502	48001.8	119446	75067.5	43481.1	184211	57921	39244.4	123359	84116.4	64414.6	133724	45070.6	51276.1	116123	88188	3	3	3	58.8	9.1175	1	P61960	Ubiquitin-fold modifier 1	UFM1	Signaling	sp|O75533|SF3B1_HUMAN
70841.1	NAN	NAN	54350.3	NAN	NAN	90166.3	NAN	NAN	67570.2	NAN	NAN	76729.8	NAN	NAN	70127.9	NAN	NAN	71788.9	2	2	2	5.1	62.518	2	Q9UMX0	Ubiquilin-1	UBQLN1	Signaling	sp|P52823|STC1_HUMAN
NAN	NAN	118654	NAN	NAN	54316.4	NAN	NAN	123778	NAN	NAN	28423.6	NAN	NAN	131664	NAN	NAN	34001.2	81806.2	1	1	1	4.5	27.563	1	O43657	Tetraspanin-6	TSPAN6	Signaling	sp|O00391|QSOX1_HUMAN
55338.7	NAN	NAN	48702.2	NAN	NAN	53654.1	NAN	NAN	64822.2	NAN	NAN	63788.1	NAN	NAN	130981	NAN	NAN	72389.6	1	1	1	0.9	119.03	1	Q86UV5	Ubiquitin carboxyl-terminal hydrolase 48	USP48	Signaling	sp|P00441|SODC_HUMAN
105428	NAN	97607.2	132662	NAN	29509.7	199123	NAN	45750.5	39124.9	NAN	15032.5	231075	NAN	55223.7	59392.8	NAN	34855.5	85396.1	1	1	1	0.4	291.07	1	O00507	Probable ubiquitin carboxyl-terminal hydrolase FAF-Y	USP9Y	Signaling	sp|P04179|SODM_HUMAN
NAN	NAN	82071.9	NAN	NAN	38166	NAN	NAN	60246.9	NAN	NAN	29876	NAN	NAN	43103	NAN	NAN	26927.6	46731.9	1	1	1	2.9	37.567	3	P62879	Guanine nucleotide-binding protein G(I)/G(S)/G(T) subunit beta-2	GNB2	signaling	sp|Q9Y5Y6|ST14_HUMAN
NAN	48942.5	62018	NAN	42333.1	27520.1	NAN	38023.4	72716.7	NAN	18494.4	30228	NAN	50454.7	37378	NAN	16731.7	25567.1	39200.7	3	3	3	17.5	15.585	1	P21741	Midkine	MDK	signaling	sp|Q99536|VAT1_HUMAN
NAN	NAN	32568.7	NAN	NAN	159976	NAN	NAN	21843.3	NAN	NAN	18769.5	NAN	NAN	25051.3	NAN	NAN	19977.7	46364.5	2	2	2	24.2	10.4	1	P25815	Protein S100-P	S100P	signaling	sp|O15498|YKT6_HUMAN
16486.5	NAN	NAN	12582.2	NAN	NAN	18204.4	NAN	NAN	8994.95	NAN	NAN	27631	NAN	NAN	15082.6	NAN	NAN	16499	4	2	2	16.7	28.082	4	P31946	14-3-3 protein beta/alpha	YWHAB	Signaling	sp|O00161|SNP23_HUMAN
NAN	123838	284743	NAN	97283	233506	NAN	147832	285731	NAN	46572.8	151221	NAN	198599	197419	NAN	101463	160021	169019	4	4	4	15.6	33.155	1	Q13277	Syntaxin-3	STX3	Transport	sp|P31431|SDC4_HUMAN
41851.7	62679.2	NAN	39051.8	45321.2	NAN	42450.7	65982.7	NAN	29377	32936.5	NAN	52794.5	68423.3	NAN	41090	80740.2	NAN	50986.1	5	5	5	48	11.471	1	Q99584	Protein S100-A13	S100A13	Transport	sp|Q13277|STX3_HUMAN
5.44527e+07	4.81289e+07	6.03103e+07	4.59162e+07	4.81957e+07	4.65927e+07	5.82316e+07	5.02075e+07	6.18684e+07	4.21813e+07	3.24025e+07	4.62612e+07	6.15391e+07	5.69937e+07	3.88524e+07	4.53437e+07	4.97261e+07	4.43398e+07	4.92407e+07	59	59	54	79.1	69.366	2	P02768	Serum albumin	ALB	Transport	sp|O00560|SDCB1_HUMAN
8.84604e+06	7.71909e+06	1.14037e+07	9.95783e+06	1.00612e+07	8.49864e+06	1.3046e+07	1.1628e+07	1.05717e+07	5.79469e+06	4.45131e+06	5.97456e+06	1.32272e+07	9.8187e+06	8.32893e+06	7.03686e+06	9.83982e+06	6.07141e+06	9.02527e+06	40	40	38	59.5	77.063	1	P02787	Serotransferrin	TF	Transport	sp|P24821|TENA_HUMAN
8.06085e+06	9.88425e+06	9.40242e+06	6.96166e+06	8.33066e+06	6.34901e+06	9.95231e+06	7.86928e+06	7.50333e+06	3.28942e+06	3.46999e+06	3.9546e+06	1.25397e+07	1.17073e+07	5.75426e+06	5.36037e+06	5.14557e+06	5.75626e+06	7.24884e+06	6	6	6	30.1	25.382	1	P05814	Beta-casein	CSN2	Transport	sp|P05452|TETN_HUMAN;CON__Q2KIS7
3.58192e+06	3.66301e+06	3.47167e+06	3.21592e+06	3.50431e+06	3.05597e+06	3.9915e+06	3.29786e+06	3.6816e+06	3.20035e+06	2.84244e+06	2.59104e+06	4.09094e+06	4.90051e+06	2.11687e+06	4.13599e+06	5.51871e+06	2.92256e+06	3.54125e+06	13	13	13	76.7	14.858	2	P05413	Fatty acid-binding protein, heart	FABP3	Transport	sp|O43657|TSN6_HUMAN
3.3231e+06	2.67424e+06	5.06208e+06	2.39335e+06	2.43046e+06	2.33178e+06	4.19867e+06	3.27826e+06	3.97246e+06	2.53578e+06	1.70945e+06	2.22196e+06	4.37545e+06	3.16659e+06	2.85706e+06	2.6852e+06	2.77124e+06	2.66352e+06	3.01927e+06	21	21	21	25.8	122.2	2	P00450	Ceruloplasmin	CP	Transport	sp|P10599|THIO_HUMAN
4.06578e+06	3.12603e+06	4.65452e+06	2.27573e+06	3.28942e+06	2.21535e+06	4.37181e+06	2.82751e+06	3.43434e+06	2.4955e+06	1.15064e+06	1.68405e+06	6.89586e+06	5.71412e+06	4.3876e+06	2.13707e+06	1.83685e+06	1.90123e+06	3.19986e+06	17	17	17	62.2	30.777	2	P02647	Apolipoprotein A-I	APOA1	Transport	sp|O95881|TXD12_HUMAN
2.1633e+06	2.32033e+06	9.27233e+06	2.34946e+06	3.34181e+06	2.15193e+06	3.96943e+06	4.335e+06	5.20873e+06	1.43061e+06	555335	1.40477e+06	2.36499e+06	1.18222e+07	4.10173e+06	1.61578e+06	2.10984e+06	1.48384e+06	3.51989e+06	12	12	12	57.8	21.671	1	P47710	Alpha-S1-casein	CSN1S1	Transport	sp|Q9BRA2|TXD17_HUMAN
3.60808e+06	1.96255e+06	3.49582e+06	3.22664e+06	2.75191e+06	2.27305e+06	3.18729e+06	2.03684e+06	2.57296e+06	2.04987e+06	1.23931e+06	3.23134e+06	4.61756e+06	3.07105e+06	1.85669e+06	2.01983e+06	2.30654e+06	2.27952e+06	2.59875e+06	22	22	22	58	52.963	4	P02774	Vitamin D-binding protein	GC	Transport	sp|P07996|TSP1_HUMAN;CON__Q28194
1.17197e+06	2.33097e+06	3.54167e+06	1.16258e+06	1.95956e+06	2.64989e+06	2.16375e+06	2.39684e+06	3.4189e+06	986801	966292	1.65145e+06	2.5066e+06	3.3351e+06	2.56958e+06	1.09751e+06	1.82618e+06	1.8324e+06	2.14095e+06	24	24	24	67.7	48.075	1	Q99541	Perilipin-2	PLIN2	Transport	CON__P21752;sp|P63313|TYB10_HUMAN;sp|P62328|TYB4_HUMAN;sp|O14604|TYB4Y_HUMAN
1.83825e+06	1.84322e+06	3.59012e+06	1.34923e+06	1.69835e+06	1.57826e+06	2.57386e+06	2.60455e+06	2.65964e+06	1.35757e+06	1.2091e+06	1.8093e+06	2.22566e+06	1.98059e+06	1.90875e+06	1.14912e+06	1.88875e+06	1.82821e+06	1.95613e+06	15	15	15	40.3	51.676	1	P02790	Hemopexin	HPX	Transport	sp|P05543|THBG_HUMAN
1.19452e+06	2.9687e+06	3.70464e+06	737815	2.77489e+06	1.45733e+06	1.1843e+06	2.0805e+06	3.30748e+06	616739	1.60974e+06	2.09106e+06	1.14253e+06	4.4007e+06	2.69527e+06	851177	2.79729e+06	1.58571e+06	2.11799e+06	10	10	10	53.3	20.305	1	P07498	Kappa-casein	CSN3	Transport	sp|P04066|FUCO_HUMAN
1.87336e+06	1.71182e+06	3.09134e+06	1.29166e+06	2.16315e+06	1.76496e+06	1.73055e+06	1.73079e+06	2.75649e+06	1.14578e+06	1.37777e+06	1.87336e+06	2.36728e+06	2.6203e+06	1.65615e+06	1.04177e+06	2.64805e+06	1.42784e+06	1.90583e+06	10	10	10	28.9	48.206	1	P20061	Transcobalamin-1	TCN1	Transport	sp|Q9H497|TOR3A_HUMAN
1.10392e+06	1.56714e+06	2.11848e+06	916135	1.5462e+06	1.06417e+06	1.60151e+06	1.68896e+06	2.08975e+06	1.13779e+06	1.06329e+06	1.08638e+06	2.0928e+06	2.28775e+06	1.31972e+06	1.14103e+06	2.13633e+06	1.10967e+06	1.52748e+06	5	5	5	50.6	10.044	1	P07108	Acyl-CoA-binding protein	DBI	Transport	sp|P37837|TALDO_HUMAN
1.11021e+06	1.53233e+06	1.94724e+06	952461	1.41896e+06	1.40224e+06	1.28613e+06	1.28203e+06	1.56258e+06	926994	999190	1.06484e+06	1.50998e+06	2.10443e+06	1.21954e+06	823666	1.54417e+06	1.21582e+06	1.34074e+06	12	12	12	64.7	23.489	1	P51149	Ras-related protein Rab-7a	RAB7A	Transport	sp|P20061|TCO1_HUMAN
1.58461e+06	961015	1.67125e+06	1.42477e+06	974431	1.44837e+06	1.6054e+06	909996	1.71324e+06	1.17636e+06	623617	1.4037e+06	1.94873e+06	1.16379e+06	1.26009e+06	1.00099e+06	854310	1.03457e+06	1.24557e+06	8	8	8	56.3	16.57	1	P61916	NPC intracellular cholesterol transporter 2	NPC2	Transport	sp|P02786|TFR1_HUMAN
1.34979e+06	947259	1.47993e+06	1.0409e+06	845356	896410	1.48641e+06	1.07701e+06	1.5318e+06	1.11237e+06	608248	884621	1.41307e+06	1.03171e+06	922379	943851	973283	886585	1.0636e+06	17	17	17	26.7	69.068	2	P43652	Afamin	AFM	Transport	sp|P61586|RHOA_HUMAN;sp|P08134|RHOC_HUMAN;sp|P62745|RHOB_HUMAN
1.0638e+06	930083	1.50299e+06	942086	788090	1.32991e+06	1.50278e+06	1.26394e+06	1.32494e+06	621029	368371	707269	1.1688e+06	1.17652e+06	992357	757087	683509	812495	992486	17	17	17	47.7	47.074	1	O60664	Perilipin-3	PLIN3	Transport	sp|P37802|TAGL2_HUMAN
693531	870690	582501	646459	724286	501503	893433	938177	502130	708300	665417	441208	951141	1.0464e+06	313151	919698	1.28221e+06	562425	738184	7	7	7	41.3	21.097	1	Q9NRV9	Heme-binding protein 1	HEBP1	Transport	sp|O43493|TGON2_HUMAN
506113	913978	1.3361e+06	362218	723885	817863	714909	1.13291e+06	1.18126e+06	142826	395166	456862	1.07447e+06	1.13747e+06	803479	251989	967432	693675	770971	13	13	13	22.4	152.45	2	Q9P2E9	Ribosome-binding protein 1	RRBP1	Transport	sp|P29401|TKT_HUMAN
611630	623919	490604	516568	693242	224305	683130	479842	669860	2.31535e+06	2.23741e+06	399601	806995	976053	486507	676017	1.44476e+06	155064	816425	9	9	5	75.5	15.998	1	P68871	Hemoglobin subunit beta	HBB	Transport	sp|P13693|TCTP_HUMAN
477056	662105	645295	453549	741661	543116	607195	665740	631884	439225	542363	406896	743720	1.02899e+06	427214	473597	1.1411e+06	472515	625069	9	9	8	63	15.693	1	P29373	Cellular retinoic acid-binding protein 2	CRABP2	Transport	sp|Q14956|GPNMB_HUMAN
1.18004e+06	588670	480841	572533	212676	511615	1.17979e+06	635618	522438	1.9747e+06	292687	651814	479310	303618	178467	70025.9	554951	688836	582270	1	1	1	2	101.39	1	O14787	Transportin-2	TNPO2	Transport	sp|O14787|TNPO2_HUMAN
730538	507976	542664	416426	438161	296855	651227	461989	442587	422180	189955	251309	1.02999e+06	664357	406248	310321	353635	255064	449467	4	4	4	39	11.175	1	P02652	Apolipoprotein A-II	APOA2	Transport	sp|P02766|TTHY_HUMAN
610106	341115	522148	539738	343226	312674	698354	351143	363602	503349	224772	216889	922699	514068	275960	548070	383908	244487	429777	8	8	3	34.6	22.677	4	P62820	Ras-related protein Rab-1A	RAB1A	Transport	sp|P60174|TPIS_HUMAN
246495	305476	321687	207119	370060	127612	290726	236110	449637	963216	1.47399e+06	229272	458703	603670	293418	300478	738327	112659	440127	5	5	5	50.7	15.257	2	P69905	Hemoglobin subunit alpha	HBA	Transport	sp|O14773|TPP1_HUMAN
295439	290424	383748	237818	260803	278806	385214	313738	380385	208473	188317	246820	420312	464623	249313	306877	448951	254340	312880	6	6	6	19.5	29.717	1	Q14847	LIM and SH3 domain protein 1	LASP1	Transport	sp|P06753|TPM3_HUMAN;sp|P67936|TPM4_HUMAN;sp|P09493|TPM1_HUMAN;sp|P07951|TPM2_HUMAN;CON__Q3SX28
222724	465428	NAN	208849	382341	NAN	262799	460870	NAN	106892	187016	NAN	391323	689600	NAN	184083	359442	NAN	336240	3	3	3	12.1	22.417	1	O15498	Synaptobrevin homolog YKT6	YKT6	Transport	sp|P23381|SYWC_HUMAN
94773.8	354199	917024	74481.8	347222	314064	105721	349322	582097	69807.8	165434	247094	185518	547538	507764	63124	250613	259504	314149	11	11	11	28.8	45.398	1	P06727	Apolipoprotein A-IV	APOA4	Transport	sp|O75347|TBCA_HUMAN
462694	200438	354371	310084	213533	105340	300853	149750	336466	415532	117998	180695	544850	317633	199994	287300	216154	158135	259360	1	1	1	11.6	16.39	1	Q8NI22	Multiple coagulation factor deficiency protein 2	MCFD2	Transport	sp|Q8NAT2|TDRD5_HUMAN
195120	180358	930922	170369	194027	315111	240537	176206	450760	133049	62814.1	231925	451041	377051	506850	133919	120477	222416	288108	9	9	9	29.7	36.154	2	P02649	Apolipoprotein E	APOE	Transport	sp|O75888|TNF13_HUMAN
197624	240021	275463	185069	240887	137284	309054	239938	251152	168934	134263	126467	422795	409669	177948	186744	213163	139955	226989	4	4	4	18.9	22.977	1	Q9NP72	Ras-related protein Rab-18	RAB18	Transport	sp|P55327|TPD52_HUMAN
130691	246085	382633	122558	226194	234284	148479	242933	246564	143580	192540	220192	171542	350025	193477	124596	264315	179783	217046	4	4	4	19	24.393	3	P62491	Ras-related protein Rab-11A	RB11A	Transport	sp|Q16890|TPD53_HUMAN
173732	271464	161660	120302	214364	94249.7	224149	275444	148263	181713	222416	96310.1	216064	340289	92182.2	180771	339182	108603	193378	4	4	4	24.4	22.875	1	Q9Y5Z4	Heme-binding protein 2	HEBP2	Transport	sp|O43399|TPD54_HUMAN
229463	187613	128820	191568	194971	102531	275769	208458	102063	244335	140801	93806.5	294805	266689	93540.3	264664	281271	134757	188615	5	5	5	29	26.922	1	O00299	Chloride intracellular channel protein 1	CLIC1	Transport	sp|P78324|SHPS1_HUMAN;sp|Q5TFQ8|SIRBL_HUMAN
83252.2	320197	230195	69109.7	297803	166112	85143	277591	248502	63819.1	180495	166932	96818.8	397749	171435	61181.2	271013	152696	191576	11	11	11	12.4	119.76	1	Q9HBR0	Putative sodium-coupled neutral amino acid transporter 10	SLC38A10	Transport	sp|Q9UMX0|UBQL1_HUMAN;sp|Q9UHD9|UBQL2_HUMAN
32686.3	252181	504887	25485.7	187016	333956	48925.5	222724	445325	21716.4	112308	223064	127576	376555	341589	23406.1	210885	248726	218019	7	7	7	31.2	31.73	1	P27105	Erythrocyte band 7 integral membrane protein	STOM	Transport	sp|Q86UV5|UBP48_HUMAN
NAN	141182	NAN	NAN	130419	NAN	NAN	196096	NAN	NAN	67019.8	NAN	NAN	198902	NAN	NAN	190866	NAN	154081	1	1	1	7.6	11.749	1	P99999	Cytochrome c	CYCS	Transport	sp|P15374|UCHL3_HUMAN
59520.5	278053	213370	54967.8	273807	153035	73263.1	272576	187068	52132.7	126441	188004	63229.1	316929	136316	55994.6	262144	151315	168156	4	4	4	48.3	15.887	1	P02766	Transthyretin	TTR	Transport	sp|P62987|RL40_HUMAN;sp|P62979|RS27A_HUMAN;sp|P0CG47|UBB_HUMAN;sp|P0CG48|UBC_HUMAN
99464.9	171792	208285	84924.9	166597	114628	137084	178307	160365	87070.7	117793	92233.3	156045	234674	105743	76073.2	161056	92246.1	137936	2	2	2	10.8	23.545	2	P61019	Ras-related protein Rab-2A	RAB2A	Transport	sp|P61086|UBE2K_HUMAN
216724	187275	150656	147576	128401	64499.5	178109	156511	106596	112113	69267.9	61100.6	238247	194822	78244.4	103516	120227	48837.4	126235	3	3	3	8.1	43.173	1	P49908	Selenoprotein P	SELENOP	Transport	sp|P68036|UB2L3_HUMAN;sp|A0A1B0GUS4|UB2L5_HUMAN
NAN	95605.1	158453	NAN	87354.8	127373	NAN	99817.1	153300	NAN	67331.8	124449	NAN	130311	109928	NAN	130501	118777	116934	1	1	1	12.5	10.921	2	Q9NP97	Dynein light chain roadblock-type 1	DYNLRB1	Transport	sp|P61088|UBE2N_HUMAN;sp|Q5JXB2|UE2NL_HUMAN
NAN	116204	NAN	NAN	57716.7	NAN	NAN	121897	NAN	NAN	119753	NAN	NAN	72964.1	NAN	NAN	156467	NAN	107500	1	1	1	5.4	38.387	1	Q9UKF7	Cytoplasmic phosphatidylinositol transfer protein 1	PITPNC1	Transport	sp|Q13404|UB2V1_HUMAN
54834.6	94184.4	153982	52368.1	70767.5	139306	76575.8	90629.9	132644	52644.7	39963.6	70978.8	168023	159932	94951.3	29242.9	66101.7	76099.5	92258.6	2	2	2	9.6	22.367	2	Q9NR31	GTP-binding protein SAR1a	SAR1A	Transport	sp|P61960|UFM1_HUMAN
226948	NAN	54569.2	185557	NAN	31239.9	344896	NAN	44327.1	181536	NAN	24425.5	374031	NAN	37130.1	184364	NAN	21081.6	134833	3	3	3	6.5	54.739	1	P55058	Phospholipid transfer protein	PLTP	Transport	sp|Q8NFL0|B3GN7_HUMAN
57517	100811	124070	52349.9	81121.7	106471	69407.3	84725	96403.6	47706.6	76284.4	87082.8	88396.4	135572	84948.4	45753.7	84221.4	74895.9	84718.9	3	3	1	16.7	23.707	1	P61020	Ras-related protein Rab-5B	RAB5B	Transport	sp|Q14376|GALE_HUMAN
80049.2	61431.9	162762	57973.3	77183.2	78532.4	94190.9	63867.7	132810	37755.5	34571.6	54207.3	151169	121072	114620	69037.9	77268.9	51718.8	84715.9	4	4	4	36.4	14.889	1	O15540	Fatty acid-binding protein, brain	FABP7	Transport	sp|P30085|KCY_HUMAN
22175.8	89011.2	159169	20703.7	100247	100623	24819.7	118876	117118	17904.1	86098.5	66028.4	33961.2	137627	82408.2	17203.3	188160	109723	86451.8	1	1	1	0.7	136.68	1	Q9BZH6	WD repeat-containing protein 11	WDR11	Transport	sp|Q6UX73|CP089_HUMAN;sp|Q6NSJ2|PHLB3_HUMAN
NAN	52502.6	NAN	NAN	48928.9	NAN	NAN	73594	NAN	NAN	73019.8	NAN	NAN	81719.9	NAN	NAN	84719.1	NAN	69080.7	5	1	1	39.5	16.055	2	P02042	Hemoglobin subunit delta	HBD	Transport	sp|Q03405|UPAR_HUMAN
79232.2	NAN	NAN	67275.8	NAN	NAN	116737	NAN	NAN	47314.7	NAN	NAN	83506.4	NAN	NAN	33747.7	NAN	NAN	69716.3	2	2	2	0.4	515.6	1	P04114	Apolipoprotein B-100	APOB	Transport	sp|Q16851|UGPA_HUMAN
62622.8	62653.2	NAN	57696.7	54523.9	NAN	71235.1	55990.7	NAN	67117.4	36197.4	NAN	82820.5	79905.1	NAN	43841.2	55338.7	NAN	60665.4	1	1	1	5.3	23.461	3	Q9NRW1	Ras-related protein Rab-6B	RAB6B	Transport	sp|P54727|RD23B_HUMAN;sp|P54725|RD23A_HUMAN
388593	13404.2	129501	278400	13865.4	42748.9	424587	17437.4	87925.9	271897	5815.55	40378.5	443785	19442.1	57872.9	337962	10841.7	38618.4	131440	5	5	5	29.6	21.275	1	P05090	Apolipoprotein D	APOD	Transport	sp|Q9P0L0|VAPA_HUMAN
NAN	69614.5	90705.3	NAN	67828.3	42589.2	NAN	74121.3	68115.7	NAN	32265.4	50738.7	NAN	83547	43508.2	NAN	59839.1	35059.1	59827.6	1	1	1	0.5	274.37	1	P11717	Cation-independent mannose-6-phosphate receptor	IGF2R	Transport	sp|P46459|NSF_HUMAN
45963.5	23307.4	184134	31110.2	23889.7	142184	43953.8	25188.9	129008	31562	17952.5	119372	59797.6	33368.5	107987	67257.1	42102	148623	72399.9	3	3	3	12.8	19.595	3	P13693	Translationally-controlled tumor protein	TPT1	Transport	sp|P02774|VTDB_HUMAN
NAN	67640.5	132727	NAN	68551.5	28437.4	NAN	43481.1	80321.6	NAN	27539.2	67696.8	NAN	99720.3	49981.3	NAN	34526.1	36835.3	61454.8	1	1	1	1.1	94.198	1	Q8IWT6	Volume-regulated anion channel subunit LRRC8A	LRRC8A	Transport	sp|P04004|VTNC_HUMAN
120227	38099.9	97925.7	73650.1	34278.1	42921.1	129330	35538.6	73085.6	90310.1	19005.1	42630.5	147127	55430.8	46511.5	75915.1	30662.8	39451.7	63051.4	3	3	3	4.4	67.993	1	P08195	4F2 cell-surface antigen heavy chain	SLC3A2	Transport	sp|P54289|CA2D1_HUMAN
NAN	NAN	125776	NAN	NAN	37562.4	NAN	NAN	66593.8	NAN	NAN	51112.9	NAN	NAN	38535.5	NAN	NAN	27755.8	57889.4	1	1	1	9.4	14.371	1	P51161	Gastrotropin	FABP6	Transport	sp|Q8IWT6|LRC8A_HUMAN
71507.2	NAN	90586	67856.5	NAN	21708.9	101267	NAN	48668.5	76618.2	NAN	26333.3	73131.2	NAN	23787.2	61474.5	NAN	25748.5	56107.2	4	3	3	5.1	92.468	2	P14625	Endoplasmin	HSP90B1	Transport	sp|Q6PCB0|VWA1_HUMAN
NAN	40471	72034.5	NAN	30565.1	30596.9	NAN	37947	53978.6	NAN	15687.2	21728.5	NAN	62181.6	41129.9	NAN	34860.4	33637.9	39568.2	1	1	1	1.7	75.759	1	O95436	Sodium-dependent phosphate transport protein 2B	SLC34A2	Transport	sp|Q7Z7D3|VTCN1_HUMAN
105377	29849.1	49392.4	156706	29395.3	25395.8	259127	111463	12941.3	56595.5	9846.53	5815.55	146577	33041.7	9851.31	72485.3	23896.3	8051.82	61201.8	2	2	2	16.7	10.18	1	P06703	Protein S100-A6	S100A6	Transport	sp|Q15904|VAS1_HUMAN
NAN	NAN	148397	NAN	NAN	14405.2	NAN	NAN	41764.8	NAN	NAN	22409.1	NAN	NAN	26273.1	NAN	NAN	21932.8	45863.6	2	2	2	17	15.164	1	Q01469	Fatty acid-binding protein 5	FABP5	Transport	sp|Q14508|WFDC2_HUMAN
16628.8	29591.6	67922.4	19988.7	33301.5	50974.9	19979	30238.5	50384.8	14684.4	19528.6	33170.2	25051.3	53464.7	41378.7	15226.5	29326.1	26686.1	32994	1	1	1	6.5	23.897	1	P61106	Ras-related protein Rab-14	RAB14	Transport	sp|Q9BZH6|WDR11_HUMAN
NAN	NAN	30474.2	NAN	NAN	18380.6	NAN	NAN	35012.9	NAN	NAN	24495	NAN	NAN	22174.3	NAN	NAN	19551.6	25014.8	1	1	1	1.5	83.207	1	Q14746	Conserved oligomeric Golgi complex subunit 2	COG2	Transport	sp|P47989|XDH_HUMAN
NAN	NAN	31322.2	NAN	NAN	24503.5	NAN	NAN	25208.1	NAN	NAN	24590.3	NAN	NAN	22206.6	NAN	NAN	19278.4	24518.2	3	1	1	15.8	23.658	2	P20339	Ras-related protein Rab-5A	RAB5A	Transport	sp|P25311|ZA2G_HUMAN
14853.3	NAN	NAN	16491.1	NAN	NAN	8103.33	NAN	NAN	12675.9	NAN	NAN	11055.7	NAN	NAN	30918.9	NAN	NAN	15849	1	1	1	6.2	19.25	1	P31025	Lipocalin-1	LCN1	Transport	sp|Q96DA0|ZG16B_HUMAN
