# Supplementary material for: Geography and ethnicity related variation in the Chinese human milk serum proteome
Source: Royal Society of Chemistry journal article supplement (doi:10.1039/c9fo01591d), 2019-01-01
Supplement: c9fo01591d6.xlsx [file c9fo01591d6.xlsx]

## Sheet: Sheet1
HanYN	BaiYN	HanGS	Tibetan GS	Mengolian IM	Uygur XJ
CFL1	A1BG	ALB	A1BG	ALB	ALDOA
CHI3L1	ALB	APOA1	ALB	ALDOA	APOA1
FUCA1	ALDOA	APOH	ALDOA	APOA1	APOH
HBA	APOA1	ASAH1	APOA1	APOH	ASAH1
HLA-DRB1	APOH	AZGP1	APOH	AZGP1	AZGP1
HP	ASAH1	CD9	AZGP1	BTD	BTD
ICAM1	AZGP1	CEACAM1	BTN1A1	BTN1A1	CALB2
IGA2	CALB2	CLU	CAPG	CANT1	CAPG
IGLV3-10	CD9	CSN1S1	CD9	CD9	CD9
LASP1	CFI	CTSD	CEACAM1	CFI	CFI
MUC5B	CFL1	FABP3	CFI	CFL1	CFL1
PPIB	CLU	FUCA1	CFL1	CLEC3B	CHI3L1
SELENBP1	CSN1S1	HLA-DRB1	CHI3L1	CLU	CLU
SERPINA3	CSN2	HLA-DRB1-12	CLEC3B	CSN1S1	CSN1S1
SERPING1	CST3	HP	CLU	CSN2	CTSD
SH3BGRL3	DDAH1	HPX	CSN2	CST3	ENO1
SPINT1	FABP3	HSPA5	CST3	CUTA	ERO1A
SPP1	FUCA1	ICAM1	DDAH1	DDAH1	FABP3
TF	GAPDH	KLK6	ERO1A	ENO1	FAM3B
TXN	HP	LALBA	FABP3	FABP3	FUCA1
	HPX	ORM1	FABP7	FABP7	GAPDH
FABP3	HSP90AB1	PODXL	FAM3B	FAM3B	HLA-DRB1
PLIN3	HSPA5	SERPINA3	FUCA1	FUCA1	HSP90AB1
ALDOA	ICAM1	SERPING1	GAPDH	HP	HSPA5
TAGLN2	IGL1	SPINT1	HBA	HSP90AB1	ICAM1
GAPDH	IGLV3-10	TF	HLA-DRB1	HSPA5	IGA2
TALDO1	IGLV8-61	XDH	HP	ICAM1	IGFBP2
	KLK6		HSP90AB1	IGHM	IGHM
	LALBA		HSPA5	IGLC7	IGHV5-51
UBE2L3	LASP1	IGFBP2	ICAM1	LALBA	IGL1
ENO1	LDHB	CANT1	IGA2	LASP1	IGLC3
	LGALS3BP	IGLC3	IGHM	LDHB	IGLV8-61
HLA-DRB1	MUC5B	CLEC3B	IGHV5-51	LPL	LASP1
	ORM1		IGLV3-10	MFGE8	LGALS3BP
HSPA5	P4HB	CSN2	LALBA	MUC1	MUC5B
IGL1	PDIA4	HSP90AB1	LASP1	ORM1	PDIA4
LDHB	PFN1	CUTA	LPL	P4HB	PEBP1
	PLIN3	CHI3L1	MFGE8	PDIA4	PFN1
PFN1	PODXL	DDAH1	MUC1	PFN1	PODXL
	PPIA	PDIA4	MUC5B	PGM1	PPIA
	PPIB	PPIA	P4HB	PODXL	PPIB
PGM1	SERPINA3	IGLC7	PDIA4	PPIB	PSAP
	SERPING1	PSAP	PEBP1	SERPINA3	SELENBP1
LGALS3BP	SPP1	IGHM	PFN1	SH3BGRL3	SERPINA3
	TAGLN2	TXN	PGM1	TAGLN2	SERPING1
CD9	TF	P4HB	PODXL	TET1	SH3BGRL3
PDIA4	TNPO2	PPIB	PPIA	TF	SPP1
	TXN	CFL1	PPIB	TXN	TAGLN2
PPIA	XDH	SH3BGRL3	SERPINA3	XDH	TALDO1
			SERPING1		TET1
			SH3BGRL3		TF
			SPINT1		TXN
			SPP1		UBE2L3
			TAGLN2		XDH
			TALDO1
			TNPO2
			TXN
			XDH
